# Supplementary material for: Impact of early low-calorie low-protein versus standard-calorie standard-protein feeding on outcomes of ventilated adults with shock: design and conduct of a randomised, controlled, multicentre, open-label, parallel-group trial (NUTRIREA-3)
Source: PubMed Central journal article supplement — BMJ Open. 2021 May 11;11(5):e045041. doi: 10.1136/bmjopen-2020-045041 (PMC8117996; doi:10.1136/bmjopen-2020-045041), 2021-05-11
Supplement: bmjopen-2020-045041.draft_revisions.pdf [file bmjopen-2020-045041.draft_revisions.pdf]

# BMJ Open

BMJ Open is committed to open peer review. As part of this commitment we make the peer review history of every article we publish publicly available.

When an article is published we post the peer reviewers' comments and the authors' responses online. We also post the versions of the paper that were used during peer review. These are the versions that the peer review comments apply to.

The versions of the paper that follow are the versions that were submitted during the peer review process. They are not the versions of record or the final published versions. They should not be cited or distributed as the published version of this manuscript.

BMJ Open is an open access journal and the full, final, typeset and author-corrected version of record of the manuscript is available on our site with no access controls, subscription charges or pay-per-view fees (<http://bmjopen.bmj.com>).

If you have any questions on BMJ Open's open peer review process please email [info.bmjopen@bmj.com](mailto:info.bmjopen@bmj.com)

# BMJ Open

## Impact of Early Low-Calorie Low-Protein versus Standard-Calorie Standard-Protein Feeding on Outcomes of Ventilated Adults with Shock: Design and Conduct of a Randomised, Controlled, Multicentre, Open-Label, Parallel-Group Trial (NUTRIREA-3)

|                               |                                                                                                                                                                                                                                                                                                                                                                                                                                                                                                                                                                                                                                                                                                                                                                                                                                                                                                                                                                                                                                                                                                                                                                                                                                                                                                                                                                                                                                                                                                                                                                                                                                                                                                                                                                                                                                                                                                                                                        |
|-------------------------------|--------------------------------------------------------------------------------------------------------------------------------------------------------------------------------------------------------------------------------------------------------------------------------------------------------------------------------------------------------------------------------------------------------------------------------------------------------------------------------------------------------------------------------------------------------------------------------------------------------------------------------------------------------------------------------------------------------------------------------------------------------------------------------------------------------------------------------------------------------------------------------------------------------------------------------------------------------------------------------------------------------------------------------------------------------------------------------------------------------------------------------------------------------------------------------------------------------------------------------------------------------------------------------------------------------------------------------------------------------------------------------------------------------------------------------------------------------------------------------------------------------------------------------------------------------------------------------------------------------------------------------------------------------------------------------------------------------------------------------------------------------------------------------------------------------------------------------------------------------------------------------------------------------------------------------------------------------|
| Journal:                      | <i>BMJ Open</i>                                                                                                                                                                                                                                                                                                                                                                                                                                                                                                                                                                                                                                                                                                                                                                                                                                                                                                                                                                                                                                                                                                                                                                                                                                                                                                                                                                                                                                                                                                                                                                                                                                                                                                                                                                                                                                                                                                                                        |
| Manuscript ID                 | bmjopen-2020-045041                                                                                                                                                                                                                                                                                                                                                                                                                                                                                                                                                                                                                                                                                                                                                                                                                                                                                                                                                                                                                                                                                                                                                                                                                                                                                                                                                                                                                                                                                                                                                                                                                                                                                                                                                                                                                                                                                                                                    |
| Article Type:                 | Protocol                                                                                                                                                                                                                                                                                                                                                                                                                                                                                                                                                                                                                                                                                                                                                                                                                                                                                                                                                                                                                                                                                                                                                                                                                                                                                                                                                                                                                                                                                                                                                                                                                                                                                                                                                                                                                                                                                                                                               |
| Date Submitted by the Author: | 20-Sep-2020                                                                                                                                                                                                                                                                                                                                                                                                                                                                                                                                                                                                                                                                                                                                                                                                                                                                                                                                                                                                                                                                                                                                                                                                                                                                                                                                                                                                                                                                                                                                                                                                                                                                                                                                                                                                                                                                                                                                            |
| Complete List of Authors:     | <p>Reignier, Jean; Centre Hospitalier Universitaire de Nantes, Médecine intensive réanimation<br/> Le Gouge, Amélie; Centre Hospitalier Regional Universitaire de Tours, INSERM CIC 1415<br/> Lascarrou, Jean-Baptiste; Centre Hospitalier Universitaire de Nantes, Service de Médecine Intensive Réanimation<br/> annane, djillali; Hôpital Raymond Poincaré, Service de Médecine Intensive Réanimation<br/> Argaud, Laurent Argaud; Centre Hospitalier Universitaire de Lyon, Service de Médecine Intensive Réanimation<br/> Hourmant, Yannick; CHU Nantes, Pôle Anesthésie Réanimations, Service d'Anesthésie Réanimation Chirurgicale<br/> Asfar, Pierre; Centre Hospitalier Universitaire d'Angers, Service de Médecine Intensive Réanimation<br/> Badie, Julio; Hôpital Nord Franche-Comté, Service de Médecine Intensive Réanimation<br/> Nay, Mai-Anh; Centre Hospitalier Régional d'Orleans Hôpital de La Source, Service de Médecine Intensive Réanimation<br/> Botoc, Nicolae-Vlad; Centre Hospitalier de Saint-Malo, Service de Médecine Intensive Réanimation<br/> Brisard, Laurent; CHU Nantes, Service d'Anesthésie Réanimation Chirurgicale<br/> Bui, Hoang-Nam; CHU de Bordeaux, Service de Médecine Intensive Réanimation<br/> Chatellier, Delphine; CHU Poitiers, Service de Médecine Intensive Réanimation<br/> Chauvelot, Louis; CHU Lyon, Service de Médecine Intensive Réanimation<br/> Combes, Alain; Hôpital Universitaire Pitié Salpêtrière, Service de Médecine Intensive Réanimation<br/> Cracco, Christophe; Centre Hospitalier d'Angouleme, Service de Médecine Intensive Réanimation<br/> Darmon, Michael; Hôpital Saint-Louis, Service de Médecine Intensive Réanimation<br/> Das, Vincent; CHI André Grégoire, Médecine Intensive Réanimation<br/> Debarre, Matthieu; Centre Hospitalier de Saint Briec, Médecine Intensive Réanimation<br/> Delbove, Agathe; Centre Hospitalier Bretagne Atlantique, Réanimation</p> |

1  
2  
3  
4  
5  
6  
7  
8  
9  
10  
11  
12  
13  
14  
15  
16  
17  
18  
19  
20  
21  
22  
23  
24  
25  
26  
27  
28  
29  
30  
31  
32  
33  
34  
35  
36  
37  
38  
39  
40  
41  
42  
43  
44  
45  
46  
47  
48  
49  
50  
51  
52  
53  
54  
55  
56  
57  
58  
59  
60

|  |                                                                                                                                                                                                                                                                                                                                                                                                                                                                                                                                                                                                                                                                                                                                                                                                                                                                                                                                                                                                                                                                                                                                                                                                                                                                                                                                                                                                                                                                                                                                                                                                                                                                                                                                                                                                                                                                                                                                                                                                                                                                                                                                                                                                                                                                                                                                                                                                                                                                                                                                                                                                                                                                                                                                                                                                                                                                                                                                                                                                                                                                                                                                                                                                                                                                                                                                   |
|--|-----------------------------------------------------------------------------------------------------------------------------------------------------------------------------------------------------------------------------------------------------------------------------------------------------------------------------------------------------------------------------------------------------------------------------------------------------------------------------------------------------------------------------------------------------------------------------------------------------------------------------------------------------------------------------------------------------------------------------------------------------------------------------------------------------------------------------------------------------------------------------------------------------------------------------------------------------------------------------------------------------------------------------------------------------------------------------------------------------------------------------------------------------------------------------------------------------------------------------------------------------------------------------------------------------------------------------------------------------------------------------------------------------------------------------------------------------------------------------------------------------------------------------------------------------------------------------------------------------------------------------------------------------------------------------------------------------------------------------------------------------------------------------------------------------------------------------------------------------------------------------------------------------------------------------------------------------------------------------------------------------------------------------------------------------------------------------------------------------------------------------------------------------------------------------------------------------------------------------------------------------------------------------------------------------------------------------------------------------------------------------------------------------------------------------------------------------------------------------------------------------------------------------------------------------------------------------------------------------------------------------------------------------------------------------------------------------------------------------------------------------------------------------------------------------------------------------------------------------------------------------------------------------------------------------------------------------------------------------------------------------------------------------------------------------------------------------------------------------------------------------------------------------------------------------------------------------------------------------------------------------------------------------------------------------------------------------------|
|  | <p>Polyvalente</p> <p>Devaquet, Jérôme; Hôpital Foch, Medical-Surgical Intensive Care Unit</p> <p>Voicu, Sebastian; Hopital Lariboisiere, Médecine Intensive Réanimation</p> <p>Aissaoui-Balanant, Nadia; Hôpital Europeen Georges-Pompidou - Broussais, Médecine Intensive Réanimation</p> <p>Dumont, Louis-Marie; Hôpital Louis-Mourier, Service de Médecine Intensive Réanimation</p> <p>Oziel, Johanna; Hôpital Avicenne, Service de Médecine Intensive Réanimation</p> <p>Gontier, Olivier; Centre Hospitalier de Chartres, Service de Médecine Intensive Réanimation</p> <p>Groyer, Samuel; Centre Hospitalier de Montauban, Service de Médecine Intensive Réanimation</p> <p>Guidet, Bertrand ; Hôpital Saint-Antoine, Service de Médecine Intensive Réanimation</p> <p>Jaber, S.; Hôpital Saint-Eloi, Service de Réanimation chirurgicale</p> <p>Lambiotte, Fabien; Centre Hospitalier de Valenciennes, Service de Médecine Intensive Réanimation</p> <p>Leroy, Christophe; Centre Hospitalier Emile Roux, Service de Médecine Intensive Réanimation</p> <p>Letocart, Philippe; Centre Hospitalier de Rodez, Service de Médecine Intensive Réanimation</p> <p>Madeux, Benjamin; Centre Hospitalier de Bigorre, Service de Médecine Intensive Réanimation</p> <p>Maizel, Julien; Centre Hospitalier Universitaire Amiens-Picardie, Service de Médecine Intensive Réanimation</p> <p>Martinet, Olivier; Centre Hospitalier Universitaire de La Réunion, Service de Médecine Intensive Réanimation</p> <p>Martino, Frédéric; Centre Hospitalier Universitaire Pointe-à-Pitre Abymes, Service de Médecine Intensive Réanimation</p> <p>Mercier, Emmanuelle; Centre Hospitalier Régional Universitaire de Tours, Service de Médecine Intensive Réanimation</p> <p>Mira, Jean-Paul; Hôpital Cochin, Service de Médecine Intensive Réanimation</p> <p>Nseir, Saad; CHU Lille, Service de Médecine Intensive Réanimation</p> <p>Picard, Walter; Centre Hospitalier de Pau, Service de Médecine Intensive Réanimation</p> <p>Piton, G; Centre Hospitalier Universitaire de Besancon, Service de Médecine Intensive Réanimation</p> <p>Plantefeve, Gaetan; Centre Hospitalier d'Argenteuil, Service de Médecine Intensive Réanimation</p> <p>Quenot, Jean-Pierre; Centre Hospitalier Universitaire de Dijon, Service de Médecine Intensive Réanimation</p> <p>Renault, Anne; CHRU de Brest, Service de Médecine Intensive Réanimation</p> <p>Guérin, Laurent; Centre Hospitalier Universitaire de Bicêtre, Service de Médecine Intensive Réanimation</p> <p>Richecoeur, Jack; Centre Hospitalier de Beauvais, Service de Médecine Intensive Réanimation</p> <p>Rigaud, Jean Philippe; Centre Hospitalier de Dieppe, Service de Médecine Intensive Réanimation</p> <p>Schneider, Francis; Hopitaux universitaires de Strasbourg, Service de Médecine Intensive Réanimation</p> <p>Silva, Daniel; Centre Hospitalier de Saint Denis, Service de Médecine Intensive Réanimation</p> <p>Sirodot, Michel; Centre Hospitalier Annecy Genevois, Service de Médecine Intensive Réanimation</p> <p>Souweine, Bertrand; Centre Hospitalier Universitaire de Clermont-Ferrand, Service de Médecine Intensive Réanimation</p> <p>Reizine, Florian; Centre Hospitalier Universitaire de Rennes, Service de Médecine Intensive et Réanimation</p> |
|--|-----------------------------------------------------------------------------------------------------------------------------------------------------------------------------------------------------------------------------------------------------------------------------------------------------------------------------------------------------------------------------------------------------------------------------------------------------------------------------------------------------------------------------------------------------------------------------------------------------------------------------------------------------------------------------------------------------------------------------------------------------------------------------------------------------------------------------------------------------------------------------------------------------------------------------------------------------------------------------------------------------------------------------------------------------------------------------------------------------------------------------------------------------------------------------------------------------------------------------------------------------------------------------------------------------------------------------------------------------------------------------------------------------------------------------------------------------------------------------------------------------------------------------------------------------------------------------------------------------------------------------------------------------------------------------------------------------------------------------------------------------------------------------------------------------------------------------------------------------------------------------------------------------------------------------------------------------------------------------------------------------------------------------------------------------------------------------------------------------------------------------------------------------------------------------------------------------------------------------------------------------------------------------------------------------------------------------------------------------------------------------------------------------------------------------------------------------------------------------------------------------------------------------------------------------------------------------------------------------------------------------------------------------------------------------------------------------------------------------------------------------------------------------------------------------------------------------------------------------------------------------------------------------------------------------------------------------------------------------------------------------------------------------------------------------------------------------------------------------------------------------------------------------------------------------------------------------------------------------------------------------------------------------------------------------------------------------------|

|           |                                                                                                                                                                                                                                                                                                                                                                                                                                                                                                                                                                                                                                                                                                                                                                                                                                                                                                                                                                                                                                                                                                                                                                                                                                                                                                                                                                                                                                     |
|-----------|-------------------------------------------------------------------------------------------------------------------------------------------------------------------------------------------------------------------------------------------------------------------------------------------------------------------------------------------------------------------------------------------------------------------------------------------------------------------------------------------------------------------------------------------------------------------------------------------------------------------------------------------------------------------------------------------------------------------------------------------------------------------------------------------------------------------------------------------------------------------------------------------------------------------------------------------------------------------------------------------------------------------------------------------------------------------------------------------------------------------------------------------------------------------------------------------------------------------------------------------------------------------------------------------------------------------------------------------------------------------------------------------------------------------------------------|
|           | <p>Tamion, Fabienne; Centre Hospitalier Universitaire de Rouen, Service de Médecine Intensive Réanimation</p> <p>Terzi, Nicolas ; Centre Hospitalier Universitaire Grenoble Alpes Hopital Michallon, Service de Médecine Intensive Réanimation</p> <p>Thévenin, Didier; Centre Hospitalier de Lens, Service de Médecine Intensive Réanimation</p> <p>Thiéry, Guillaume; Centre Hospitalier Universitaire de Saint-Etienne, Service de Médecine Intensive Réanimation</p> <p>Thieulot-Rolin, Nathalie; Centre Hospitalier de Melun, Service de Médecine Intensive Réanimation</p> <p>Timsit, Jean-François; Hôpital Bichat - Claude-Bernard, Service de Médecine Intensive Réanimation</p> <p>Tinturier, François; Centre Hospitalier Universitaire Amiens-Picardie, Réanimation chirurgicale</p> <p>Tirot, Patrice; Centre Hospitalier du Mans, Service de Médecine Intensive Réanimation</p> <p>Vanderlinden, Thierry; Institut Catholique de Lille, Service de Médecine Intensive Réanimation</p> <p>Vinatier, Isabelle; Centre Hospitalier Départemental Vendée, Service de Médecine Intensive Réanimation</p> <p>Vinsonneau, Christophe; Centre Hospitalier de Béthune, Service de Médecine Intensive Réanimation</p> <p>Maugars, Diane; Centre Hospitalier Universitaire de Nantes, Service de Médecine Intensive Réanimation</p> <p>Giraudeau, Bruno; Centre Hospitalier Régional Universitaire de Tours, Inserm CIC 1415</p> |
| Keywords: | Adult intensive & critical care < INTENSIVE & CRITICAL CARE, NUTRITION & DIETETICS, Clinical trials < THERAPEUTICS                                                                                                                                                                                                                                                                                                                                                                                                                                                                                                                                                                                                                                                                                                                                                                                                                                                                                                                                                                                                                                                                                                                                                                                                                                                                                                                  |
|           |                                                                                                                                                                                                                                                                                                                                                                                                                                                                                                                                                                                                                                                                                                                                                                                                                                                                                                                                                                                                                                                                                                                                                                                                                                                                                                                                                                                                                                     |

SCHOLARONE™  
Manuscripts

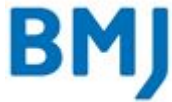

I, the Submitting Author has the right to grant and does grant on behalf of all authors of the Work (as defined in the below author licence), an exclusive licence and/or a non-exclusive licence for contributions from authors who are: i) UK Crown employees; ii) where BMJ has agreed a CC-BY licence shall apply, and/or iii) in accordance with the terms applicable for US Federal Government officers or employees acting as part of their official duties; on a worldwide, perpetual, irrevocable, royalty-free basis to BMJ Publishing Group Ltd ("BMJ") its licensees and where the relevant Journal is co-owned by BMJ to the co-owners of the Journal, to publish the Work in this journal and any other BMJ products and to exploit all rights, as set out in our [licence](#).

The Submitting Author accepts and understands that any supply made under these terms is made by BMJ to the Submitting Author unless you are acting as an employee on behalf of your employer or a postgraduate student of an affiliated institution which is paying any applicable article publishing charge ("APC") for Open Access articles. Where the Submitting Author wishes to make the Work available on an Open Access basis (and intends to pay the relevant APC), the terms of reuse of such Open Access shall be governed by a Creative Commons licence – details of these licences and which [Creative Commons](#) licence will apply to this Work are set out in our licence referred to above.

Other than as permitted in any relevant BMJ Author's Self Archiving Policies, I confirm this Work has not been accepted for publication elsewhere, is not being considered for publication elsewhere and does not duplicate material already published. I confirm all authors consent to publication of this Work and authorise the granting of this licence.

1  
2  
3 **Impact of Early Low-Calorie Low-Protein versus Standard-Calorie Standard-Protein**  
4  
5 **Feeding on Outcomes of Ventilated Adults with Shock: Design and Conduct of a**  
6  
7 **Randomised, Controlled, Multicentre, Open-Label, Parallel-Group Trial (NUTRIREA-**  
8  
9 **3)**  
10  
11  
12  
13  
14

15 Jean Reignier<sup>1</sup>, Amélie Le Gouge<sup>2</sup>, Jean-Baptiste Lascarrou<sup>1</sup>, Djillali Annane<sup>3</sup>, Laurent  
16 Argaud<sup>4</sup>, Yannick Hourmant<sup>5</sup>, Pierre Asfar<sup>6</sup>, Julio Badie<sup>7</sup>, Mai-Anh Nay<sup>8</sup>, Nicolae-Vlad  
17 Botoc<sup>9</sup>, Laurent Brisard<sup>10</sup>, Hoang-Nam Bui<sup>11</sup>, Delphine Chatellier<sup>12</sup>, Louis Chauvelot<sup>13</sup>,  
18 Alain Combes<sup>14</sup>, Christophe Cracco<sup>15</sup>, Michael Darmon<sup>16</sup>, Vincent Das<sup>17</sup>, Matthieu  
19 Debarre<sup>18</sup>, Agathe Delbove<sup>19</sup>, Jérôme Devaquet<sup>20</sup>, Sebastian Voicu<sup>21</sup>, Nadia Aissaoui-  
20 Balanant<sup>22</sup>, Louis-Marie Dumont<sup>23</sup>, Johanna Oziel<sup>24</sup>, Olivier Gontier<sup>25</sup>, Samuel Groyer<sup>26</sup>,  
21 Bertrand Guidet<sup>27</sup>, Samir Jaber<sup>28</sup>, Fabien Lambiotte<sup>29</sup>, Christophe Leroy<sup>30</sup>, Philippe  
22 Letocart<sup>31</sup>, Benjamin Madeux<sup>32</sup>, Julien Maizel<sup>33</sup>, Olivier Martinet<sup>34</sup>, Frédéric Martino<sup>35</sup>,  
23 Emmanuelle Mercier<sup>36</sup>, Jean-Paul Mira<sup>37</sup>, Saad Nseir<sup>38</sup>, Walter Picard<sup>39</sup>, Gael Piton<sup>40</sup>,  
24 Gaetan Plantefevé<sup>41</sup>, Jean-Pierre Quenot<sup>42</sup>, Anne Renault<sup>43</sup>, Laurent Guérin<sup>44</sup>, Jack  
25 Richecoeur<sup>45</sup>, Jean-Philippe Rigaud<sup>46</sup>, Francis Schneider<sup>47</sup>, Daniel Silva<sup>48</sup>, Michel Sirodot<sup>49</sup>,  
26 Bertrand Souweine<sup>50</sup>, Florian Reizine<sup>51</sup>, Fabienne Tamion<sup>52</sup>, Nicolas Terzi<sup>53</sup>, Didier  
27 Thévenin<sup>54</sup>, Guillaume Thiery<sup>55</sup>, Nathalie Thieulot-Rolin<sup>56</sup>, Jean-Francois Timsit<sup>57</sup>, Francois  
28 Tinturier<sup>58</sup>, Patrice Tirof<sup>59</sup>, Thierry Vanderlinden<sup>60</sup>, Isabelle Vinatier<sup>61</sup>, Christophe  
29 Vinsonneau<sup>62</sup>, Diane Maugars<sup>63</sup>, Bruno Giraudeau<sup>2,64</sup>.  
30  
31  
32  
33  
34  
35  
36  
37  
38  
39  
40  
41  
42  
43  
44  
45  
46  
47  
48  
49

50 <sup>1</sup> Service de Médecine Intensive Réanimation, Centre Hospitalier Universitaire de Nantes,  
51 Nantes, France ; Université de Nantes, Nantes, France  
52

53 <sup>2</sup> Inserm CIC 1415, Tours, France; Centre Hospitalier Universitaire de Tours, Tours, France  
54

55 <sup>3</sup> Service de Médecine Intensive Réanimation, Hôpital Raymond Poincaré, Assistance  
56 Publique des Hôpitaux de Paris, Garches, France ; Inserm U 1173, Université de Versailles-  
57  
58  
59  
60

1  
2  
3 Saint Quentin en Yvelines, Versailles, France.

4  
5 <sup>4</sup> Service de Médecine Intensive Réanimation, Hôpital Edouard Herriot, Hospices Civils de  
6  
7  
8 Lyon, Lyon, France

9  
10 <sup>5</sup> Laboratoire UPRES EA3826 «Thérapeutiques Cliniques Et Expérimentales Des  
11  
12 Infections», IRS2 - Nantes Biotech, Université De Nantes, Nantes, France; Centre  
13  
14 Hospitalier Universitaire de Nantes, Pôle Anesthésie Réanimations, Service d'Anesthésie  
15  
16 Réanimation Chirurgicale, Hôtel Dieu, Nantes, F-44093, France.

17  
18  
19 <sup>6</sup> Service de Médecine Intensive Réanimation, Centre Hospitalier Universitaire Angers,  
20  
21 Angers, France

22  
23  
24 <sup>7</sup> Service de Médecine Intensive Réanimation, Hôpital Nord Franche Comté, Belfort, France

25  
26 <sup>8</sup>Service de Médecine Intensive Réanimation, Centre Hospitalier Régional d'Orléans,  
27  
28 Orléans, France.

29  
30  
31 <sup>9</sup> Service de Médecine Intensive Réanimation, Centre Hospitalier de Saint Malo, Saint-Malo,  
32  
33 France

34  
35 <sup>10</sup> Service d'Anesthésie Réanimation Chirurgicale, Hopital Laënnec, Centre Hospitalier  
36  
37 Universitaire de Nantes, Nantes, France

38  
39  
40 <sup>11</sup> Service de Médecine Intensive Réanimation, Centre Hospitalier Universitaire de Bordeaux,  
41  
42 Bordeaux, France

43  
44  
45 <sup>12</sup> Service de Médecine Intensive Réanimation, Centre Hospitalier Universitaire de Poitiers,  
46  
47 Poitiers, France

48  
49  
50 <sup>13</sup> Service de Médecine Intensive Réanimation, Hôpital de la Croix Rousse, Hospices Civils  
51  
52 de Lyon, Lyon, France

53  
54 <sup>14</sup> Service de Médecine Intensive Réanimation, Institut de Cardiométabolisme et Nutrition,  
55  
56 Centre Hospitalier Universitaire La Pitié-Salpêtrière, Assistance Publique –Hôpitaux de  
57  
58 Paris, Paris, France; Sorbonne Université, Paris, France

1  
2  
3 15 Service de Médecine Intensive Réanimation, Centre Hospitalier d'Angoulême,  
4  
5 Angoulême, France  
6

7  
8 16 Service de Médecine Intensive Réanimation, Centre Hospitalier Universitaire Saint Louis,  
9  
10 Assistance Publique –Hôpitaux de Paris, Paris, France  
11

12 17 Service de Médecine Intensive Réanimation, Centre Hospitalier Intercommunal André  
13  
14 Grégoire, Montreuil, France  
15

16  
17 18 Service de Médecine Intensive Réanimation, Centre Hospitalier de Saint Briec, Saint  
18  
19 Briec, France  
20

21 19 Service de Médecine Intensive Réanimation, Centre Hospitalier Bretagne-Atlantique,  
22  
23 Vannes, France  
24

25  
26 20 Service de Réanimation polyvalente, Hôpital Foch, Suresnes, France  
27

28 21 Service de Médecine Intensive Réanimation, Centre Hospitalier Universitaire Lariboisière,  
29  
30 Assistance Publique –Hôpitaux de Paris, Paris, France  
31

32 22 Service de Médecine Intensive Réanimation, Hôpital Européen Georges Pompidou,  
33  
34 Assistance Publique –Hôpitaux de Paris, Paris, France  
35

36 23 Service de Médecine Intensive Réanimation, Hôpital Louis-Mourier, Assistance Publique  
37  
38 –Hôpitaux de Paris, Colombes, France  
39

40 24 Service de Médecine Intensive Réanimation, Hôpital Avicenne, Assistance Publique –  
41  
42 Hôpitaux de Paris, Bobigny, France  
43

44 25 Service de Médecine Intensive Réanimation, Centre Hospitalier de Chartres, Chartres,  
45  
46 France  
47

48  
49 26 Service de Médecine Intensive Réanimation, Centre Hospitalier de Montauban,  
50  
51 Montauban, France  
52

53  
54 27 Service de Médecine Intensive Réanimation, Hopital Saint Antoine, Assistance Publique –  
55  
56 Hôpitaux de Paris, Paris, France  
57  
58  
59  
60



- 1  
2  
3 28 Service de Réanimation chirurgicale, Hôpital Saint-Eloi, CHU de Montpellier,  
4  
5 Montpellier, France ; PhyMedExp, INSERM, CNRS, Montpellier, France  
6  
7 29 Service de Médecine Intensive Réanimation, Centre Hospitalier de Valenciennes,  
8  
9 Valenciennes, France  
10  
11  
12 30 Service de Médecine Intensive Réanimation, Centre Hospitalier Emile Roux, Le Puy-en-  
13  
14 Velay, France  
15  
16  
17 31 Service de Médecine Intensive Réanimation, Centre Hospitalier Jacques Puel, Rodez,  
18  
19 France  
20  
21 32 Service de Médecine Intensive Réanimation, Centre Hospitalier de Bigorre, Tarbes, France  
22  
23  
24 33 Service de Médecine Intensive Réanimation, Centre Hospitalier Universitaire Amiens-  
25  
26 Picardie, Amiens, France  
27  
28  
29 34 Service de Médecine Intensive Réanimation, Centre Hospitalier Universitaire de la  
30  
31 Réunion, Saint-Denis, La Réunion, France  
32  
33 35 Service de Médecine Intensive Réanimation, Centre Hospitalier Universitaire de Pointe-à-  
34  
35 Pitre-Abymes, Pointe-à-Pitre, Guadeloupe, France  
36  
37  
38 36 Service de Médecine Intensive Réanimation, Centre Hospitalier Universitaire Bretonneau,  
39  
40 CRICS-TRIGGERSEP network Tours, France  
41  
42  
43 37 Service de Médecine Intensive Réanimation, Hôpital Cochin, Groupe Hospitalier Centre-  
44  
45 Université de Paris, Assistance Publique –Hôpitaux de Paris, Paris, France  
46  
47  
48 38 CHU de Lille, Centre de Réanimation, Lille, France; Université de Lille, INSERM U995,  
49  
50 Lille Inflammation Research International Center E2, F-59000 Lille, France  
51  
52  
53 39 Service de Médecine Intensive Réanimation, Centre Hospitalier de Pau, Pau, France  
54  
55  
56 40 Service de Médecine Intensive Réanimation, Centre Hospitalier Universitaire de Besançon,  
57  
58 Besançon, France  
59  
60 41 Service de Médecine Intensive Réanimation, Centre Hospitalier d'Argenteuil, Argenteuil,

1  
2  
3 France

4  
5 <sup>42</sup> Service de Médecine Intensive Réanimation, Centre Hospitalier Universitaire François  
6 Mitterrand, Dijon, France ; Lipness Team, INSERM, LabExLipSTIC, Université de  
7 Bourgogne, Dijon, France; INSERM Centres d'Investigation Clinique, Département  
8 d'épidémiologie clinique, Université de Bourgogne, Dijon, France.

9  
10  
11  
12  
13  
14 <sup>43</sup> Service de Médecine Intensive Réanimation, Centre Hospitalier Universitaire La Cavale  
15 Blanche, Brest, France

16  
17  
18  
19 <sup>44</sup> Service de Médecine Intensive Réanimation, Centre Hospitalier Universitaire Bicêtre,  
20 Assistance Publique –Hôpitaux de Paris, Paris, France

21  
22  
23  
24 <sup>45</sup> Service de Médecine Intensive Réanimation, Centre Hospitalier de Beauvais, Beauvais,  
25 France

26  
27  
28 <sup>46</sup> Service de Médecine Intensive Réanimation, Centre Hospitalier de Dieppe, Dieppe, France

29  
30  
31 <sup>47</sup> Service de Médecine Intensive Réanimation, Hôpital de Hautepierre, Centre Hospitalier  
32 Universitaire de Strasbourg, Strasbourg, France.

33  
34  
35 <sup>48</sup> Service de Médecine Intensive Réanimation, Hôpital Delafontaine, Saint-Denis, France

36  
37  
38 <sup>49</sup> Service de Médecine Intensive Réanimation, Centre Hospitalier Annecy Genevois, Pringy,  
39 France

40  
41  
42 <sup>50</sup> Service de Médecine Intensive Réanimation, Centre Hospitalier Universitaire Gabriel-  
43 Montpied, Clermont-Ferrand, France.

44  
45  
46  
47 <sup>51</sup> Service de Médecine Intensive Réanimation, Centre Hospitalier Universitaire de Rennes,  
48 Rennes, France

49  
50  
51 <sup>52</sup> Service de Médecine Intensive Réanimation, Hôpital Charles Nicolle, Centre Hospitalier  
52 Universitaire de Rouen; Normandie Université, UNIROUEN, Inserm U1096, FHU-REMODO-  
53 VHF, Rouen, France  
54  
55  
56  
57  
58  
59  
60

1  
2  
3 5<sup>3</sup> Service de Médecine Intensive Réanimation, Université de Grenoble-Alpes, Grenoble,  
4  
5 France. INSERM 1042, Grenoble, France.

6  
7 5<sup>4</sup> Service de Médecine Intensive Réanimation, Centre Hospitalier de Lens, Lens, France

8  
9  
10 5<sup>5</sup> Service de Médecine Intensive Réanimation, Centre Hospitalier Universitaire de Saint  
11  
12 Etienne, Saint Priest en Jarez, France.

13  
14 5<sup>6</sup> Service de Médecine Intensive Réanimation, Centre Hospitalier Marc Jacquet, Melun,  
15  
16 France

17  
18 5<sup>7</sup> Service de Médecine Intensive Réanimation, Centre Hospitalier Universitaire Bichat-  
19  
20 Claude Bernard, AP-HP, Paris, France ; Université Paris, INSERM IAME, U1137, Team  
21  
22 DesCID, Paris, France.

23  
24 5<sup>8</sup> Service de Réanimation Chirurgicale, Centre Hospitalier Universitaire Amiens-Picardie,  
25  
26 Amiens, France

27  
28 5<sup>9</sup> Service de Médecine Intensive Réanimation, Centre Hospitalier du Mans, Le Mans, France

29  
30 6<sup>0</sup> Service de Médecine Intensive Réanimation, Groupe Hospitalier Institut Catholique de  
31  
32 Lille/Faculté Libre de Médecine/Université Lille Nord de France, Lomme, France ;

33  
34 6<sup>1</sup> Service de Médecine Intensive Réanimation, Centre Hospitalier Départemental de la  
35  
36 Vendée, La Roche sur Yon, France

37  
38 6<sup>2</sup> Service de Médecine Intensive Réanimation, Centre Hospitalier de Béthune, Béthune,  
39  
40 France

41  
42 6<sup>3</sup> Service de Médecine Intensive Réanimation, Unité d'Investigation Clinique, CHU Nantes,  
43  
44 Nantes, France

45  
46 6<sup>4</sup> Inserm CIC 1415, Tours, France; Université de Tours, Tours, France; CHU Tours, Tours,  
47  
48 France.

1  
2  
3 **Corresponding author:** Professor Jean Reignier, Service de Médecine Intensive  
4  
5 Réanimation, Centre Hospitalier Universitaire Hôtel-Dieu, 30 Bd. Jean Monnet, 44093  
6  
7 Nantes Cedex 1, FRANCE  
8  
9  
10 Phone: + 33 240 087 365  
11  
12 E-mail: [jean.reignier@chu-nantes.fr](mailto:jean.reignier@chu-nantes.fr)  
13  
14  
15  
16  
17  
18

19 **Key words:** Critical illness, nutritional support, mechanical ventilation, shock, calories,  
20  
21 proteins, vasoactive drugs, nosocomial infection  
22  
23  
24  
25

26 **Manuscript Word Count (body only):** 4494 words  
27  
28  
29

30 **Abstract Word Count:** 299  
31  
32  
33  
34  
35  
36  
37  
38  
39  
40  
41  
42  
43  
44  
45  
46  
47  
48  
49  
50  
51  
52  
53  
54  
55  
56  
57  
58  
59  
60

## ABSTRACT

**Introduction:** International guidelines include early nutritional support ( $\leq 48$  h after admission), 20-25 kcal/kg/d, and 1.2-2 g/kg/d protein at the acute phase of critical illness. Recent data challenge the wisdom of providing standard amounts of calories and protein during acute critical illness. Restricting calorie and protein intakes seemed beneficial, suggesting a role for metabolic pathways such as autophagy, a potential key mechanism in muscle protection during critical illness. However, the optimal calorie and protein supply at the acute phase of severe critical illness remains unknown. NUTRIREA-3 will be the first trial to compare standard calorie and protein feeding complying with guidelines to low-calorie low-protein feeding. We hypothesised that nutritional support with calorie and protein restriction during acute critical illness decreased day-90 mortality and/or dependency on ICU management in mechanically ventilated patients receiving vasoactive amine therapy for shock, compared to standard calorie and protein targets.

**Methods and analysis:** NUTRIREA-3 is a randomised, controlled, multicentre, open-label trial comparing two parallel groups of patients receiving invasive mechanical ventilation and vasoactive amine therapy for shock and given early nutritional support according to one of two strategies: early calorie-protein restriction (6 kcal/kg/d-0.2-0.4 g/kg/d) or standard calorie-protein targets (25 kcal/kg/d-1.0-1.3g/kg/d) at the acute phase defined as the first 7 days in the ICU. We will include 3044 patients in 61 French ICUs. Two primary end-points will be evaluated: day-90 mortality and time to ICU discharge readiness. The trial will be considered positive if significant between-group differences are found for one or both alternative primary endpoints. Secondary outcomes include hospital-acquired infections and nutritional, clinical, and functional outcomes.

**Ethics and dissemination:** The NUTRIREA-3 study has been approved by the appropriate

1  
2  
3 ethics committee. Patients are included after informed consent. Results will be submitted for  
4  
5 publication in peer-reviewed journals.  
6

7  
8 **Trial Registration:** ClinicalTrials: NCT01802099. Date of registration: February 27, 2013.  
9  
10  
11  
12  
13  
14  
15  
16  
17  
18  
19  
20  
21  
22  
23  
24  
25  
26  
27  
28  
29  
30  
31  
32  
33  
34  
35  
36  
37  
38  
39  
40  
41  
42  
43  
44  
45  
46  
47  
48  
49  
50  
51  
52  
53  
54  
55  
56  
57  
58  
59  
60

For peer review only

## STRENGTHS AND LIMITATIONS OF THIS STUDY

- NUTRIREA-3 is a pragmatic randomised controlled trial whose large number of patients recruited in numerous intensive care units (ICUs) enhance the reliability and general applicability of the results.
- We included a well-defined population of very severely critically ill patients requiring at least vasoactive drugs and mechanical ventilation, at high risk for death or protracted recovery, and therefore most likely to benefit from improved early nutritional support.
- We used two strong patient-centred primary outcomes, i.e., 90-day mortality and ICU dependency, and we evaluated important secondary outcomes, including long-term function, in keeping with recommendations about studies on of nutritional support in critically ill patients.
- NUTRIREA-3 is the first study to evaluate the potential benefits of calorie and protein restriction versus standard calorie and protein targets during early nutritional support, using very different amounts of calories and proteins.
- A limitation is that blinding of nutritional strategies is not feasible.

## INTRODUCTION

Severe critical illness is associated during the acute phase with anorexia, metabolic disorders, endocrine dysfunction, and a major catabolic response responsible for severe skeletal and diaphragmatic muscle wasting(1). Among critically ill patients requiring mechanical ventilation (MV) and catecholamines for shock, nearly 40% to 50% die, and functional recovery is often delayed in survivors (2). Nutritional support is crucial, as malnutrition is associated with poor outcomes. Prescribing nutritional support in the critically ill is the result of a complex decision-making process designed to optimise three key parameters: the timing, the dose, and the route of artificial feeding. International guidelines encourage early nutritional support ( $\leq 48$  h after admission), via the enteral route if not contraindicated, with 20-25 kcal/kg/d, and 1.2-2 g/kg/d protein at the acute phase(3, 4). These targets are rarely achieved in patients with severe critical illnesses, who frequently experience gastroparesis responsible for intolerance to enteral nutrition(5). Observational studies have indicated that calorie and protein deficiencies were associated with nosocomial infections, ICU-acquired weakness, delayed weaning off MV, longer stays, and higher mortality(6-12).

However, recent data challenge the wisdom of providing standard amounts of calories and protein during the acute phase of critical illness(13, 14). Studies showed no outcome benefits with higher intakes(15, 16). Instead, adding parenteral nutrition to increase intakes was associated with longer ICU stays and more infectious complications(17, 18). Higher protein intakes during the acute phase may be associated with greater muscle wasting and ICU-acquired weakness(1, 19). Restricting calorie and protein intakes seemed beneficial, suggesting a role for metabolic pathways such as autophagy, a potential key mechanism in muscle protection during critical illness(20, 21). The recent EDEN and PERMIT trials showed no differences in patient outcomes between hypocaloric and standard feeding(22-24).



1  
2  
3 However, in both studies, calorie intakes were below-target in the standard groups.  
4

5 Moreover, patients in both PERMIT trial groups received similar protein intakes, as protein  
6 solutions were added in the hypocaloric group. Thus, the optimal calorie and protein supply  
7  
8 at the acute phase of severe critical illness remains unknown(14, 25-28).  
9  
10

11  
12 We designed the NUTRIREA-3 trial to compare standard calorie and protein feeding  
13 complying with guidelines to low-calorie low-protein feeding in a well-defined group of  
14 severely ill ICU patients requiring at least MV and vasoactive drugs. These patients typically  
15 have poor outcomes with long ICU stays, high frequencies of ICU-acquired weakness and  
16 infections, and high mortality(1, 29). Reported impacts of nutritional support were greatest in  
17 the most severely ill ICU patients (3, 4, 30, 31). Our hypothesis is that, in those severe  
18 critically ill patients, low-calorie low-protein feeding at the early phase of critical illness  
19 improves muscle preservation, thereby improving outcomes, and most notably diminishing  
20 mortality and dependency on ICU care.  
21  
22  
23  
24  
25  
26  
27  
28  
29  
30  
31  
32  
33  
34  
35  
36  
37  
38  
39  
40  
41  
42  
43  
44  
45  
46  
47  
48  
49  
50  
51  
52  
53  
54  
55  
56  
57  
58  
59  
60

## METHODS AND ANALYSIS

### Trial design

NUTRIREA-3 is a randomised, controlled, multicentre, open-label trial comparing two parallel groups of patients.

### Participants, interventions, outcomes

#### *Participating units*

Of the 61 French ICUs participating in the study, 34 are in university hospitals. All participating ICU staff members have attended training in the study procedures and protocols for providing nutritional support.

#### *Study population and recruitment modalities*

*Inclusion criteria* are age older than 18 years; invasive MV for an expected duration of at least 48 hours after inclusion, started in the ICU within the past 24 h, or started before ICU admission with ICU admission within the 24 h after intubation; treatment with a vasoactive agent for shock (adrenaline, dobutamine, or noradrenaline); nutritional support expected to be started within 24 h after intubation or within 24 h after ICU admission when MV was started before ICU admission; and patient and/or next-of-kin informed about the study and having consented to participation in the study. If the patient is unable to receive information and no next-of-kin can be contacted during screening for the study, trial inclusion will be completed as an emergency procedure by the ICU physician, in compliance with French law.

*Exclusion criteria* are specific nutritional needs, such as pre-existing long-term home enteral or parenteral nutrition, for chronic bowel disease; dying patient, not-to-be-resuscitated

1  
2  
3 order, or other treatment limitation decision at ICU admission; pregnancy, recent delivery, or  
4  
5 lactation; adult under guardianship; and department of corrections inmate.  
6  
7  
8  
9

### 10 ***Interventions***

11  
12 After study inclusion, patients will be allocated at random to one of two nutritional  
13 support strategies (Figure 1). The designated feeding strategy will be initiated as soon as  
14 possible after randomisation (in all patients, within 24 hours after intubation or ICU  
15 admission in patients with MV started before admission) and continued until extubation and  
16 withdrawal of vasoactive support, or death, or day 7, whichever occurs first.  
17  
18  
19  
20  
21  
22  
23

24 In the low-calorie low-protein (Low) group, the calorie target will be 6 kcal/kg/day  
25 and the protein target 0.2-0.4 g/kg/d during the acute phase, i.e. from D0 to D7. On D8, the  
26 calorie target will be 30 kcal/kg/d and the protein target 1.2-2.0 g/kg/d.  
27  
28  
29

30 In the standard-calorie/standard-protein (Standard) group, the first-line calorie target  
31 calculated based on body weight is 25 kcal/kg/day and the protein target 1.0-1.3 g/kg/d  
32 during the acute phase, i.e. from D0 to D7. On D8, the calorie target will be 30 kcal/kg/d and  
33 the protein target 1.2-2.0 g/kg/d.  
34  
35  
36  
37  
38  
39  
40  
41

### 42 ***Nutritional support protocol***

43  
44 The nutritional support protocol, including measures designed to evaluate tolerance,  
45 is standardised as indicated below.  
46  
47  
48

#### 49 *General principles of nutritional support in both study arms*

50  
51 Nutritional support is started as soon as possible after randomisation and no later than  
52 24 hours after intubation or after ICU admission if intubation preceded ICU admission. Daily  
53 nutritional intakes needed to meet the allocated calorie target will be calculated based on  
54 body weight (BW). In obese patients (BMI>30 Kg/m<sup>2</sup>), the body weight yielding a BMI of  
55  
56  
57  
58  
59  
60

1  
2  
3 30 will be used. In patients with BMI<18.5, the following corrected body weight will be  
4 used: (ideal body weight + actual body weight)/2. The calorie/protein ratios of nutritional  
5 solutions currently available in French hospitals will ensure that the protein intake complies  
6 with the allocated nutritional regimen.  
7  
8  
9  
10

11  
12 Randomised controlled trials showed that feeding route during the acute phase had no  
13 impact on major clinical outcomes of critically ill patients (32, 33). Thus, during the acute  
14 phase, bedside physicians will be free, each day, to choose the best feeding route, according  
15 to clinical considerations, to ensure that the calorie target is achieved. After the acute phase,  
16 enteral feeding remains the preferred route in patients without contraindications (4). Thus, on  
17 day 8, in the absence of contraindications to enteral nutrition, parenteral nutrition will be  
18 stopped in those patients fed via the parenteral route and enteral nutrition started. From day 8  
19 onwards, supplemental parenteral nutrition may be added in the event of intolerance to  
20 enteral nutrition precluding the achievement of the predefined calorie targets.  
21  
22  
23  
24  
25  
26  
27  
28  
29  
30  
31  
32

33 Nutritional support is prescribed as a flow rate (mL/hour) and started at the prescribed  
34 flow rate (as opposed to increased gradually). The feed is delivered continuously over the 24-  
35 hour cycle, with no interruptions. Actual feed delivery is monitored regularly based on the  
36 volumes delivered relative to the predefined daily calorie targets. In addition, special  
37 attention is directed to avoiding delays. Any interruption in feed delivery is reported to the  
38 ICU physician in charge. Except in special situations, nutritional support is not interrupted  
39 while transporting the patient. However, when EN or PN must be interrupted (e.g., for a  
40 specific gastrointestinal or radiological investigation), the flow rate is not increased to  
41 compensate for the interruption. Finally, all patients are in the semi-recumbent supine  
42 position (torso inclined 30° to 45° relative to the horizontal plane).  
43  
44  
45  
46  
47  
48  
49  
50  
51  
52  
53  
54

55  
56 After extubation, regardless of time since randomisation, decisions about the  
57 continued need for, and optimal route of, nutritional support are made by the physician in  
58  
59  
60

1  
2  
3 charge of the patient. Patients who are reintubated within 7 days after trial inclusion are  
4 managed until the end of the acute phase according to the arm they were randomised to  
5  
6 during the first intubation period.  
7  
8

### 9 10 *Enteral nutrition (EN)*

11  
12 Iso-osmotic iso-caloric normal-protein polymeric preparations are used during the  
13 first week, after which the choice of feed is at the discretion of the physician. The feed is  
14 delivered via a 14-French silicone gastric tube. Tube position in the middle of the stomach is  
15 checked on a radiograph obtained at ICU admission or immediately after tube placement, as  
16 well as when the tube is changed or repositioned.  
17  
18  
19  
20  
21  
22

23  
24 A predefined protocol is used to manage upper gastrointestinal intolerance to enteral  
25 nutrition. This protocol was used in the NUTRIREA-2 trial(33). To minimise the risk of  
26 gastric intolerance and consequently of vomiting, the volume of supplemental water given  
27 enterally will be as small as possible during the first study week. Residual gastric volume is  
28 not monitored(34). The tolerance of enteral nutrition is defined based only on episodes of  
29 significant vomiting or regurgitation (passage of enteral nutrition formula into the mouth,  
30 outside the mouth, or into the endotracheal tube in the absence of care procedures or  
31 mobilisation). Minimal regurgitation or vomiting triggered by tracheal aspiration or oral  
32 cavity care is not taken to indicate intolerance. EN intolerance leads to the following two  
33 measures. First, treatment with a prokinetic agent is initiated after confirmation that there are  
34 no contraindications. The study ICUs use the prokinetic agent of their choice, according to  
35 their standard practice. The prokinetic agent is discontinued when EN at the highest  
36 prescribed flow rate has been well tolerated for 48 hours. Second, if gastric intolerance  
37 persists despite prokinetic therapy, the flow rate is decreased by 25 mL/h every 6 hours until  
38 the signs of intolerance resolve. Therefore, EN is stopped (and the gastric tube placed under  
39 suction) only in patients with intolerance despite a flow rate  $\leq 25$  mL/h. All interruptions in  
40  
41  
42  
43  
44  
45  
46  
47  
48  
49  
50  
51  
52  
53  
54  
55  
56  
57  
58  
59  
60

1  
2  
3 EN delivery must be reported to the physician in charge of the patient. This precaution is  
4 particularly important in patients receiving insulin. EN is resumed at the prescribed flow rate  
5 (appropriate to the patient's needs) after 6 hours have elapsed with no further signs of  
6 intolerance. Patients at high risk for gastric intolerance, such as those turned in the prone  
7 position for acute respiratory distress syndrome (ARDS), receive prophylactic prokinetic  
8 treatment starting at the first turn in the prone position (35, 36).  
9

### 17 *Parenteral nutrition (PN)*

19 Ternary admixtures packaged in bags and containing the three groups of  
20 macronutrients are used according to standard practice in each participating centre.  
21 Supplemental electrolytes are supplied in a solution separate from the parenteral feed,  
22 according to the needs of each patient. PN is delivered continuously via a central venous  
23 catheter (CVC). Special attention is directed to preventing infections by complying with the  
24 standard protocols for CVC insertion and maintenance used in each of the participating  
25 centres. Proper CVC position is checked on a radiograph.  
26  
27  
28  
29  
30  
31  
32  
33

### 35 *Additional intakes*

37 Additional water, electrolytes, vitamins, and trace elements are given intravenously  
38 according to the needs of each individual patient as assessed by the physician in charge and  
39 using the standard preparations and protocols available in each study ICU.  
40  
41  
42  
43

### 45 *Monitoring of intestinal transit*

47 The volume and appearance of the stools are monitored daily. The occurrence of  
48 constipation (no stool for more than 6 days) or diarrhoea (more than 300 mL of liquid stool  
49 or 4 loose stools per day) will be reported and will lead to the appropriate diagnostic and  
50 therapeutic management (15, 37, 38).  
51  
52  
53  
54  
55  
56  
57

### 58 *Study outcomes*

### *Primary endpoints*

Two primary end-points will be analysed: all-cause mortality by day 90, and time to readiness for ICU discharge. Information on vital status will be collected on the 90<sup>th</sup> day after patient inclusion. For discharged patients, information on this primary endpoint will be collected by a telephone call to the patient's home. The time of ICU discharge to a regular ward may be affected by the availability of beds on regular wards, which may induce bias. The study will therefore consider the time to readiness for ICU discharge. A patient will be considered ready for ICU discharge as soon as all predefined clinical conditions for ICU discharge are fulfilled (Table 1), regardless of ward-bed availability. Readiness for ICU discharge will be checked daily in all patients weaned from invasive MV and vasoactive drugs. A similar strategy regarding this endpoint has been used previously in studies on nutrition in the ICU(17, 18).

The trial will be considered positive if significant between-group differences are found for one or both alternative primary endpoints.

### *Secondary outcomes*

- Daily mean values during the first week, throughout the time on IMV and from weaning off MV to readiness for ICU discharge of the following:
  - number of calories (in Kcal) delivered enterally and/or parenterally
  - ratio (as a %) of prescribed over delivered calories
- Proportion of patients who achieved their calorie target from day 0 to day 7
- Daily mean values from day 0 to day 7 and during MV of the following:
  - protein supply (g) given enterally and/or parenterally
  - volume of fluids (in mL) received (daily mean from day 0 to day 7 and during MV)

- 1  
2  
3  
4  
5  
6  
7  
8  
9  
10  
11  
12  
13  
14  
15  
16  
17  
18  
19  
20  
21  
22  
23  
24  
25  
26  
27  
28  
29  
30  
31  
32  
33  
34  
35  
36  
37  
38  
39  
40  
41  
42  
43  
44  
45  
46  
47  
48  
49  
50  
51  
52  
53  
54  
55  
56  
57  
58  
59  
60
- From day 0 to day 7:
    - SOFA score changes
    - Changes in daily maximum blood glucose levels
    - Proportion of patients with hypoglycaemia
    - Total insulin dose received daily
  - Days on insulin treatment from day 0 to readiness for ICU discharge
  - Proportion of patients with at least one ICU-acquired infection; an independent blinded committee will adjudicate all ICU-acquired infections
    - Ventilator-associated pneumonia (VAP): the diagnosis of VAP is suspected based on the development or persistence of lung infiltrates on the chest radiograph with at least two of the following criteria: body temperature  $\geq 38.5$  or  $\leq 35.5^{\circ}\text{C}$ , leucocytosis ( $>10\,000/\text{mm}^3$ ) or leucopenia ( $<4000/\text{mm}^3$ ), and purulent tracheobronchial aspirate, from H48 after intubation to H48 after extubation. The diagnosis will have to be confirmed by a positive *semi-quantitative* bacteriological test: bronchoalveolar lavage ( $>10^{-4}$  cfu/mL), brush ( $>10^{-3}$  cfu/mL), tracheal aspirate ( $>10^{-6}$  cfu/mL), or protected distal specimen ( $>10^{-3}$  cfu/mL)(39, 40). VAP episodes are recorded from 48 hours after intubation until day 2 after extubation.
      - Proportion of patients with at least one VAP episode.
      - Total number of VAP episodes in each group.
    - Other ICU-acquired infections:
      - Proportion of patients with at least one episode of bacteraemia
      - Proportion of patients with at least one central venous catheter (CVC)-related infection
      - Proportion of patients with at least one episode of urinary tract infection
      - Proportion of patients with at least one soft tissue infection



- 1
- 2
- 3                   ▪ Proportion of patients with other nosocomial infections
- 4
- 5                   – Descriptive bacteriological data: organisms recovered in the overall population with
- 6 nosocomial infections, and antimicrobial resistance profiles
- 7
- 8                   – Proportion of patients with at least one episode of liver dysfunction, defined as serum
- 9 bilirubin >50 µmol/L and/or elevation >3N of one or more liver enzymes (γ-
- 10 glutamyltransferase, alkaline phosphatase, and ASAT-ALAT) at the end of MV, on day 7 (in
- 11 patients on MV for more than 7 days), and at ICU discharge
- 12
- 13                   – Proportion of patients with at least one episode of vomiting or regurgitation while on
- 14 MV
- 15
- 16                   – Proportion of patients with at least one episode of diarrhoea defined as liquid stools in
- 17 a volume greater than 300 mL/24 hours in patients with a faecal collector or as more than
- 18 four loose stools/24 hours (15)
- 19
- 20                   – Proportion of patients with at least one episode of constipation (no stool for more than
- 21 6 days)
- 22
- 23                   – Proportion of patients with at least one documented episode of bowel ischaemia
- 24 defined as absent blood flow in one of the main arteries supplying the bowel (superior
- 25 mesenteric artery, inferior mesenteric artery, or celiac artery) with evidence of bowel wall
- 26 compromise on an imaging study (computed tomography angiography, angiography, or
- 27 magnetic resonance angiography) or presence of criteria for colonic ischaemia according to
- 28 the Favier classification system (stage I, petechiae; stage II, petechiae and superficial ulcers;
- 29 and stage III, necrotic ulcers and polypoid lesions) by endoscopy (rectosigmoidoscopy or
- 30 colonoscopy) (41)
- 31
- 32                   – Mean changes in serum albumin, pre-albumin, and C-reactive protein (CRP)
- 33 measured at baseline, at the end of MV, on day 7 (in patients on MV for more than 7 days),
- 34 and at ICU discharge
- 35
- 36
- 37
- 38
- 39
- 40
- 41
- 42
- 43
- 44
- 45
- 46
- 47
- 48
- 49
- 50
- 51
- 52
- 53
- 54
- 55
- 56
- 57
- 58
- 59
- 60

- Changes in mean body weight determined at baseline, on day 7, and at ICU discharge
- Days on MV
- Hospital stay length (days in hospital)
- ICU mortality, 28-day mortality, and hospital mortality
- Proportions of patients mobilised from day 0 to day 7 and total number of active mobilisations, using predetermined criteria (42) (Table 2).
- Total Medical Research Council (MRC) score and proportion of patients with ICU-acquired paresis at the time of readiness for ICU discharge (43, 44); the MRC score can range from 0 (quadriplegia) to 60 (normal muscle strength); scores <48 will define ICU-acquired paresis.
- Proportion of patients with at least one criterion for persistent altered health status at the time of readiness for ICU discharge, among the following: tracheostomy, non-invasive ventilation, ongoing renal-replacement therapy, parenteral nutrition, enteral nutrition via a nasogastric tube; Glasgow Coma Scale score <15, and treatment-limitation decision(45)
- SF-36 score completed during a phone call to the patient by an independent blinded research nurse or psychologist 3 months and 1 year after study inclusion(46, 47)

## **Organisation of the trial**

Figure 2 is the study diagram.

## ***Recruitment modalities***

All patients treated with invasive MV and vasopressor support for shock within 24 h after intubation, or within 24 h after ICU admission if already intubated will be screened for eligibility by the ICU physicians and clinical research nurses, around the clock and 7 days a week. Patients will be included after checking inclusion and non-inclusion criteria. A log of patients considered for study participation will be kept and will include any reasons for non-

1  
2  
3 inclusion and refusals of consent.  
4  
5  
6

### 7 8 ***Randomisation*** 9

10 Randomisation is centralised and performed using a secure, computer-generated,  
11 interactive, web-response system available at each study centre. Randomisation is stratified  
12 on study centre with a 1:1 ratio.  
13  
14  
15  
16

### 17 18 19 ***Blinding*** 20

21 The trial will be open, since the nature of the intervention precludes blinding of  
22 healthcare staff to group assignment. However, the absence of blinding cannot have an  
23 impact on either of the primary endpoints. Day-90 mortality is an objective endpoint with no  
24 evidence that absence of blinding may affect the data (48). Given more subjective nature, the  
25 primary endpoint of readiness to discharge alive from the ICU will be checked daily by the  
26 bedside physician according to predefined criteria, in order to strongly limit the risk of  
27 detection bias. Moreover, the secondary endpoints relevant to nosocomial infections will be  
28 validated by an adjudication committee.  
29  
30  
31  
32  
33  
34  
35  
36  
37  
38  
39  
40  
41  
42

### 43 ***Sample size*** 44

45 Assuming a 43% day-90 mortality rate in the Standard group and a 5% absolute decrease  
46 in day-90 mortality (to 38%) in the Low group, with the alpha risk set at 4.9% (as two  
47 interim analyses are planned) and the beta risk at 20%, 1522 patients are needed in each  
48 group, i.e., a theoretical total of 3044 patients.  
49  
50  
51  
52

53 This sample size will provide 94% power to detect a 1.5 day difference in time to ICU  
54 discharge alive between the two groups (mean, 14.5 days in the control group versus 13.0  
55 days in the experimental group).  
56  
57  
58  
59  
60

1  
2  
3 No corrections will be made for multiple comparisons. Indeed, adjusting for multiplicity  
4 is controversial and there is no consensus about the appropriate analysis (49). Moreover,  
5  
6 adjusting for multiplicity may lead to increased sample size, and subsequent decreased  
7  
8 feasibility of the study. Last, most recent studies with a similar design did not use corrections  
9  
10 for multiple comparisons (17, 18).  
11  
12  
13

14 The ICU stay lengths in survivors and mortality rates used for the sample size estimation  
15  
16 are those obtained in the NUTRIREA-1 and -2 trials, which used similar inclusion criteria.  
17  
18  
19

### 20 21 ***Interim analysis*** 22

23  
24 Given the need for a large sample size, two interim analyses will be scheduled, one  
25  
26 after enrolment of 1000 patients and the other after enrolment of 2000 patients. Members of  
27  
28 the independent Data Safety Monitoring Board (DSMB) will not be otherwise involved in the  
29  
30 trial. This DSMB consists of one methodologist and two intensivists. For both interim  
31  
32 analyses, the DSMB will have access to unblinded results on day-90 mortality, time to  
33  
34 discharge alive from the ICU, variations in SOFA scores from day 0 to day 7, amounts of  
35  
36 calories and proteins received daily from day 0 to day 7, and nosocomial infections. The  
37  
38 results of the interim analyses will not be disclosed unless they lead the DSMB to request  
39  
40 premature trial discontinuation.  
41  
42  
43  
44  
45  
46

### 47 ***Statistical analysis*** 48

49 Each patient will remain in the group assigned by randomisation, regardless of  
50  
51 subsequent events. A statistical analysis report will be written to describe all the findings,  
52  
53 according to CONSORT Statement recommendations, while taking into account the specific  
54  
55 features of the trial, most notably the nonpharmacological nature of the intervention. The  
56  
57  
58  
59  
60

1  
2  
3 baseline features of the groups established by randomisation will be compared using  
4  
5 descriptive statistics; no statistical tests will be performed.  
6

7  
8 *Primary endpoint*  
9

10 Day-90 mortality will be reported as the point estimate with the 95% confidence  
11 interval in each group. The difference in proportions with the 95% confidence interval will  
12 also be estimated. Day-90 mortality will be compared between the two groups using the chi-  
13 square test.  
14  
15  
16  
17  
18

19 Time to readiness for ICU discharge will be analysed using the competing risk  
20 approach, with death in the ICU as a competing risk.  
21  
22  
23

24 *Secondary endpoints*  
25

26 The incidence of patients with at least one nosocomial infection will be estimated and  
27 compared between the groups using a competing-risk model, with death and ICU discharge  
28 alive as competing events. The incidence of patients with at least one VAP episode will be  
29 estimated using a competing-risk model, with death and survival for 48 hours without  
30 pneumonia as competing events. For CVC-related infections, the competing risks will be  
31 death and CVC removal and for urinary tract infections they will be death and urinary  
32 catheter removal. Bacteraemia, soft tissue infections, and other infections will be analysed  
33 using the same method as for the pooled nosocomial infections. For descriptive  
34 bacteriological data (organisms recovered with their resistance profiles for each nosocomial  
35 infection), only descriptive analyses will be performed. For the proportions of patients with  
36 at least one episode of vomiting or regurgitation, diarrhoea, constipation, documented acute  
37 colonic pseudo-obstruction, documented bowel ischaemia, mechanical complication of CVC  
38 insertion, hypoglycaemia from day 0 to day 7, and liver dysfunction, the method will be the  
39 same as for nosocomial infections. Changes over time in delivered calories and proteins will  
40 be represented graphically by boxplots created each day on the same graph; changes over  
41  
42  
43  
44  
45  
46  
47  
48  
49  
50  
51  
52  
53  
54  
55  
56  
57  
58  
59  
60

1  
2  
3 time will be compared between the two groups using a mixed linear model, after data  
4 transformation if necessary. The same analysis will be performed for volume of feeds  
5 delivered each day. The proportion of patients who achieved 100% of their daily calorie  
6 target will be determined at each follow-up time point (in days) and compared between the  
7 two groups using a logistic random-effects model. Day-28 mortality will be analysed in the  
8 same way as day-90 mortality. For ICU and hospital mortality rates, competing-risk models  
9 will be used, with ICU discharge and hospital discharge as events competing with death  
10 during the stay. Changes over time in SOFA, total insulin, blood glucose, nutritional markers  
11 and body weight will be analysed using the method described above for the number of  
12 calories delivered. For the proportion of mobilised patients, patients with at least one  
13 criterion of persistent altered health status at the time of readiness for ICU discharge, and  
14 patients with ICU-acquired paresis, the method will be the same as for nosocomial infections.  
15 The Medical Research Council (MRC) sum score at the time of readiness for ICU discharge  
16 will be compared between the two groups using the non-parametric Wilcoxon test. The total  
17 quality-of-life SF-36 score will be compared between the two groups using a mixed linear  
18 model.

### 41 42 ***Data collection and follow-up***

43  
44 The following data will be recorded until the patient is extubated: demographic and  
45 clinical data, nutrition monitoring data, treatments given, laboratory tests, invasive devices,  
46 functional evaluation, and data relevant to nosocomial infections. The patient will be  
47 followed up for 1 year after study inclusion; at hospital discharge, on D28 and D90, and at 1  
48 year, the vital status will be recorded. The SF-36 score will be recorded on D90 and 1 year  
49 after study inclusion. Below is a flow-chart of patient follow-up. Table 3 is the study flow-  
50 chart.  
51  
52  
53  
54  
55  
56  
57  
58  
59  
60

### ***Data entry and monitoring***

An Internet-based data collection tool will be used for this study to store the data of all the participants. This electronic case-report form (eCRF) is a secure, interactive, web-response system available at each study centre. It is provided and managed by the biometrical unit of the Tours University Hospital (CIC INSERM 1415, Tours, France). Access to the eCRF will require only an Internet connection and a browser.

Monitoring of the data collected and of the screening forms in each participating centre will be carried out by the Research Division Promotion Department of the Nantes University hospital. Research assistants will regularly perform on-site checks of adherence to the protocol and accuracy of recorded data.

### ***Trial Status***

Inclusions started in July 2018. The scheduled interim analysis were performed on the first 1000 (by October 2009) and 2000 (by March 2020) included patients, respectively. Both analyses led the DSMB to recommend continuation of the study. Recruitment in the trial was interrupted from March to June 2020 because of the COVID-19 crisis, when all ICUs were full with COVID-19 patients and all research teams were working only on COVID-19 trials. By August 19, 2020, 2764 patients had been included. Recruitment is expected to be complete by December 2020.

### ***Ethics and dissemination***

#### ***Ethical review board***

The NUTRIREA-3 trial was approved by the competent French authorities on 20 April 2016 (*Comité de Protection des Personnes Sud-Méditerranée 2*, registration 2018-

1  
2  
3 A00424-51) and registered on ClinicalTrials (NCT01802099) on June 2018.  
4

### 5 ***Consent***

6  
7 The patients are included after providing their signed informed consent to trial  
8 participation. For patients unable to consent because of impaired consciousness or severe  
9 critical illness, information about the study is provided to their next of kin. Patients who are  
10 unable to consent and for whom no relative is available to consent to study participation  
11 within a timeframe compatible with the study design are included after completion of an  
12 emergency consent form by the bedside physician. The relatives are informed of the  
13 inclusion as soon as possible. Patients are asked to confirm their willingness to participate in  
14 the trial once they regain decision-making capacity. Data of patients without relatives who  
15 die without previously recovering consciousness will be included in the statistical analysis.  
16  
17  
18  
19  
20  
21  
22  
23  
24  
25  
26  
27

### 28 ***Confidentiality and source data archiving***

29  
30 The medical data about each patient will be communicated only to the institution (i.e.,  
31 the sponsor) with which the chief investigator is affiliated or to a person appointed by the  
32 chief investigator and the sponsor under conditions that ensure the confidentiality of the  
33 patient data. During or at completion of the study, the data collected from the study  
34 participants and communicated by the individuals involved in the study will be rendered  
35 anonymous. Study investigators will archive all study data for at least 15 years after the end  
36 of the study.  
37  
38  
39  
40  
41  
42  
43  
44  
45  
46

### 47 ***Dissemination policy***

48  
49 The publication policy will comply with international recommendations (N Engl J  
50 Med, 1997; 336:309-315) and the CONSORT statement (<http://www.consort-statement.org>).  
51 Findings will be published in peer-reviewed journals and presented during national and  
52 international scientific meetings. Communications and scientific reports relevant to this study  
53  
54  
55  
56  
57  
58  
59  
60



1  
2  
3 will be under the responsibility of the coordinator of the study (JR), who will obtain the  
4  
5 approval of the other investigators.  
6

7  
8 ***Patient and public involvement***  
9

10 Neither patients nor the public are involved in the study.  
11  
12  
13  
14  
15  
16  
17  
18  
19  
20  
21  
22  
23  
24  
25  
26  
27  
28  
29  
30  
31  
32  
33  
34  
35  
36  
37  
38  
39  
40  
41  
42  
43  
44  
45  
46  
47  
48  
49  
50  
51  
52  
53  
54  
55  
56  
57  
58  
59  
60

For peer review only

## AUTHORS' CONTRIBUTIONS:

ALG and JR prepared the first draft of the manuscript.

JR, JBL, DM, ALG, and BG wrote the manuscript.

JR, JBL, ALG, DM, and BG participated in designing the NUTRIREA-3 study.

ALG and BG wrote the statistical analysis plan and performed the sample size estimation.

JR and DM obtaining funding for the study.

JR, JBL, DA, LA, YH, PA, JB, MAM, NVB, LB, HNB, DC, LC, AC, CC, MD, VD, MD, AD, JD, SV, NAB, LMD, JO, OG, SG, BG, SJ, FL, CL, PL, BM, JM, OM, FM, EM, JPM, SN, WP, GPI, GPi, JPQ, AR, LG, JR, JPR, FS, DS, MS, BS, FR, FT, NT, DT, GT, NTR, JFT, FT, PT, TV, IV, and CV contribute to acquire the study data.

All authors revised the manuscript for important intellectual content and read and approved the final version of the manuscript.

## FUNDING STATEMENT

The NUTRIREA-3 trial is sponsored par the Nantes University Hospital (CHU, Nantes, France) and supported by a grant from the French Ministry of Health (*Programme Hospitalier de Recherche Clinique*, PHRC 2017-0213) that will cover all the expenses related to the research. The NUTRIREA-3 trial does not require funding from, or any other form of participation of, any pharmaceutical company.

## COMPETING INTEREST STATEMENT

JR had travel and accommodation expenses to attend scientific meetings covered by Baxter, and Fresenius.

## ACKNOWLEDGEMENTS

We are indebted to Antoinette Wolfe, MD, for assistance in preparing and reviewing the manuscript; Carine Coffre and Frédérique Musset for managing the database; Manon Rouaud for coordinating the study; and Prof. Sylvie Chevret (Biostatistics and Medical Information Department, Hôpital Saint-Louis, Paris, France; Centre de Recherche en Épidémiologie et Statistiques [CRESS-INSERM-UMR1153], Paris, France; Epidemiology and Clinical Statistics for Tumour, Respiratory, and Resuscitation Assessments [ECSTRRA] Team, Paris, France; Université de Paris, Paris, France), Prof. Jean Chastre (Medical ICU, La Pitié-Salpêtrière Hospital, Paris, France), and Prof. Pierre-François Laterre (St Luc University Hospital, Université Catholique de Louvain, Brussels, Belgium) for constituting the independent data safety and monitoring board.

## References

1. Puthuchery ZA, Rawal J, McPhail M, et al. Acute skeletal muscle wasting in critical illness. *JAMA* 2013;310(15):1591-1600.
2. Hermans G, Van den Berghe G. Clinical review: intensive care unit acquired weakness. *Crit Care* 2015;19:274.
3. Singer P, Blaser AR, Berger MM, et al. ESPEN guideline on clinical nutrition in the intensive care unit. *Clin Nutr* 2018.
4. Taylor BE, McClave SA, Martindale RG, et al. Guidelines for the Provision and Assessment of Nutrition Support Therapy in the Adult Critically Ill Patient: Society of Critical Care Medicine (SCCM) and American Society for Parenteral and Enteral Nutrition (A.S.P.E.N.). *Crit Care Med* 2016;44(2):390-438.
5. Blaser AR, Starkopf J, Kirsimagi U, et al. Definition, prevalence, and outcome of feeding intolerance in intensive care: a systematic review and meta-analysis. *Acta Anaesthesiol Scand* 2014;58(8):914-922.
6. Alberda C, Gramlich L, Jones N, et al. The relationship between nutritional intake and clinical outcomes in critically ill patients: results of an international multicenter observational study. *Intensive care medicine* 2009;35(10):1728-1737.
7. Elke G, Wang M, Weiler N, et al. Close to recommended caloric and protein intake by enteral nutrition is associated with better clinical outcome of critically ill septic patients: secondary analysis of a large international nutrition database. *Crit Care* 2014;18(1):R29.
8. Compher C, Chittams J, Sammarco T, et al. Greater Protein and Energy Intake May Be Associated With Improved Mortality in Higher Risk Critically Ill Patients: A Multicenter, Multinational Observational Study. *Crit Care Med* 2017;45(2):156-163.

- 1  
2  
3 9. Allingstrup MJ, Esmailzadeh N, Wilkens Knudsen A, et al. Provision of protein and  
4 energy in relation to measured requirements in intensive care patients. *Clin Nutr*  
5  
6 2012;31(4):462-468.  
7
- 8  
9  
10 10. Faisy C, Candela Llerena M, Savalle M, et al. Early ICU energy deficit is a risk factor  
11 for *Staphylococcus aureus* ventilator-associated pneumonia. *Chest* 2011;140(5):1254-1260.  
12
- 13  
14 11. Villet S, Chioloro RL, Bollmann MD, et al. Negative impact of hypocaloric feeding  
15 and energy balance on clinical outcome in ICU patients. *Clin Nutr* 2005;24(4):502-509.  
16
- 17  
18 12. Wei X, Day AG, Ouellette-Kuntz H, et al. The Association Between Nutritional  
19 Adequacy and Long-Term Outcomes in Critically Ill Patients Requiring Prolonged  
20 Mechanical Ventilation: A Multicenter Cohort Study. *Crit Care Med* 2015;43(8):1569-1579.  
21
- 22  
23 13. Casaer MP, Van den Berghe G. Nutrition in the acute phase of critical illness. *N Engl*  
24 *J Med* 2014;370(25):2450-2451.  
25
- 26  
27 14. Preiser JC, van Zanten AR, Berger MM, et al. Metabolic and nutritional support of  
28 critically ill patients: consensus and controversies. *Crit Care* 2015;19(1):35.  
29
- 30  
31 15. Doig GS, Simpson F, Finfer S, et al. Effect of evidence-based feeding guidelines on  
32 mortality of critically ill adults: a cluster randomized controlled trial. *JAMA*  
33 2008;300(23):2731-2741.  
34
- 35  
36 16. Heyland DK, Murch L, Cahill N, et al. Enhanced Protein-Energy Provision via the  
37 Enteral Route Feeding Protocol in Critically Ill Patients: Results of a Cluster Randomized  
38 Trial. *Crit Care Med* 2013.  
39
- 40  
41 17. Favez T, Kerklaan D, Mesotten D, et al. Early versus Late Parenteral Nutrition in  
42 Critically Ill Children. *N Engl J Med* 2016;374(12):1111-1122.  
43
- 44  
45 18. Casaer MP, Mesotten D, Hermans G, et al. Early versus late parenteral nutrition in  
46 critically ill adults. *N Engl J Med* 2011;365(6):506-517.  
47  
48  
49  
50  
51  
52  
53  
54  
55  
56  
57  
58  
59  
60

19. Casaer MP, Wilmer A, Hermans G, et al. Role of disease and macronutrient dose in the randomized controlled EPaNIC trial: a post hoc analysis. *Am J Respir Crit Care Med* 2013;187(3):247-255.
20. Vanhorebeek I, Gunst J, Derde S, et al. Insufficient activation of autophagy allows cellular damage to accumulate in critically ill patients. *J Clin Endocrinol Metab* 2011;96(4):E633-645.
21. Choi AM, Ryter SW, Levine B. Autophagy in human health and disease. *N Engl J Med* 2013;368(7):651-662.
22. Arabi YM, Aldawood AS, Haddad SH, et al. Permissive Underfeeding or Standard Enteral Feeding in Critically Ill Adults. *N Engl J Med* 2015;372(25):2398-2408.
23. Needham DM, Dinglas VD, Bienvenu OJ, et al. One year outcomes in patients with acute lung injury randomised to initial trophic or full enteral feeding: prospective follow-up of EDEN randomised trial. *BMJ* 2013;346:f1532.
24. Rice TW, Wheeler AP, Thompson BT, et al. Initial trophic vs full enteral feeding in patients with acute lung injury: the EDEN randomized trial. *JAMA* 2012;307(8):795-803.
25. Marik PE, Hooper MH. Normocaloric versus hypocaloric feeding on the outcomes of ICU patients: a systematic review and meta-analysis. *Intensive Care Med* 2016;42(3):316-323.
26. Marik PE, Rice TW. Feeding the Critically Ill: More Questions Than Answers! *Am J Respir Crit Care Med* 2017;195(5):555-556.
27. Preiser JC. High protein intake during the early phase of critical illness: yes or no? *Crit Care* 2018;22(1):261.
28. Singer P, Cohen J. Nutrition in the ICU: proof of the pudding is in the tasting. *Intensive Care Med* 2015;41(1):154-156.

- 1  
2  
3 29. Iwashyna TJ, Ely EW, Smith DM, et al. Long-term cognitive impairment and  
4 functional disability among survivors of severe sepsis. *JAMA* 2010;304(16):1787-1794.  
5  
6
- 7 30. Rhodes A, Evans LE, Alhazzani W, et al. Surviving Sepsis Campaign: International  
8 Guidelines for Management of Sepsis and Septic Shock: 2016. *Intensive Care Med*  
9 2017;43(3):304-377.  
10  
11
- 12 31. Artinian V, Krayem H, DiGiovine B. Effects of early enteral feeding on the outcome  
13 of critically ill mechanically ventilated medical patients. *Chest* 2006;129(4):960-967.  
14  
15
- 16 32. Harvey SE, Parrott F, Harrison DA, et al. Trial of the route of early nutritional  
17 support in critically ill adults. *N Engl J Med* 2014;371(18):1673-1684.  
18  
19
- 20 33. Reignier J, Boisrame-Helms J, Brisard L, et al. Enteral versus parenteral early  
21 nutrition in ventilated adults with shock: a randomised, controlled, multicentre, open-label,  
22 parallel-group study (NUTRIREA-2). *Lancet* 2018;391(10116):133-143.  
23  
24
- 25 34. Reignier J, Mercier E, Le Gouge A, et al. Effect of not monitoring residual gastric  
26 volume on risk of ventilator-associated pneumonia in adults receiving mechanical ventilation  
27 and early enteral feeding: a randomized controlled trial. *JAMA* 2013;309(3):249-256.  
28  
29
- 30 35. Poulard F, Dimet J, Martin-Lefevre L, et al. Impact of Not Measuring Residual  
31 Gastric Volume in Mechanically Ventilated Patients Receiving Early Enteral Feeding: A  
32 Prospective Before-After Study. *JPEN J Parenter Enteral Nutr* 2009.  
33  
34
- 35 36. Reignier J, Dimet J, Martin-Lefevre L, et al. Before-after study of a standardized ICU  
36 protocol for early enteral feeding in patients turned in the prone position. *Clin Nutr*  
37 2010;29(2):210-216.  
38  
39
- 40 37. Gacouin A, Camus C, Gros A, et al. Constipation in long-term ventilated patients:  
41 associated factors and impact on intensive care unit outcomes. *Critical care medicine*  
42 2010;38(10):1933-1938.  
43  
44  
45  
46  
47  
48  
49  
50  
51  
52  
53  
54  
55  
56  
57  
58  
59  
60

- 1  
2  
3 38. van der Spoel JI, Schultz MJ, van der Voort PH, et al. Influence of severity of illness,  
4 medication and selective decontamination on defecation. *Intensive Care Med*  
5  
6 2006;32(6):875-880.  
7  
8  
9  
10 39. Chastre J, Fagon JY. Ventilator-associated pneumonia. *Am J Respir Crit Care Med*  
11  
12 2002;165(7):867-903.  
13  
14  
15 40. Hubmayr RD, Burchardi H, Elliot M, et al. Statement of the 4th International  
16  
17 Consensus Conference in Critical Care on ICU-Acquired Pneumonia--Chicago, Illinois, May  
18  
19 2002. *Intensive Care Med* 2002;28(11):1521-1536.  
20  
21  
22 41. Favier C, Bonneau HP, Tran Minh V, et al. Endoscopic diagnosis of regressive  
23  
24 ischemic colitis. Endoscopic, histologic and arteriographic correlations. *Nouv Presse Med*  
25  
26 1976;5(2):77-79.  
27  
28  
29 42. Wright SE, Thomas K, Watson G, et al. Intensive versus standard physical  
30  
31 rehabilitation therapy in the critically ill (EPICC): a multicentre, parallel-group, randomised  
32  
33 controlled trial. *Thorax* 2017.  
34  
35  
36 43. Bittner EA, Martyn JA, George E, et al. Measurement of muscle strength in the  
37  
38 intensive care unit. *Crit Care Med* 2009;37(10 Suppl):S321-330.  
39  
40  
41 44. Sharshar T, Bastuji-Garin S, Stevens RD, et al. Presence and severity of intensive  
42  
43 care unit-acquired paresis at time of awakening are associated with increased intensive care  
44  
45 unit and hospital mortality. *Crit Care Med* 2009;37(12):3047-3053.  
46  
47  
48 45. Santamaria JD, Duke GJ, Pilcher DV, et al. The timing of discharge from the  
49  
50 intensive care unit and subsequent mortality. A prospective, multicenter study. *Am J Respir*  
51  
52 *Crit Care Med* 2015;191(9):1033-1039.  
53  
54  
55 46. Ware J, Jr., Kosinski M, Gande B. SF-36® Health Survey Manual & Interpretation  
56  
57 Guide. : Lincoln, RI: Quality Metric Incorporated; 2005.  
58  
59  
60



- 1  
2  
3 47. Oeyen SG, Vandijck DM, Benoit DD, et al. Quality of life after intensive care: a  
4 systematic review of the literature. *Crit Care Med* 2010;38(12):2386-2400.  
5  
6  
7 48. Anthon CT, Granholm A, Perner A, et al. No firm evidence that lack of blinding  
8 affects estimates of mortality in randomized clinical trials of intensive care interventions: a  
9 systematic review and meta-analysis. *Journal of clinical epidemiology* 2018;100:71-81.  
10  
11  
12 49. Li G, Taljaard M, Van den Heuvel ER, et al. An introduction to multiplicity issues in  
13 clinical trials: the what, why, when and how. *Int J Epidemiol* 2017;46(2):746-755.  
14  
15  
16  
17  
18  
19  
20  
21  
22  
23  
24  
25  
26  
27  
28  
29  
30  
31  
32  
33  
34  
35  
36  
37  
38  
39  
40  
41  
42  
43  
44  
45  
46  
47  
48  
49  
50  
51  
52  
53  
54  
55  
56  
57  
58  
59  
60

**FIGURE LEGENDS****Figure 1:** Study interventions**Figure 2:** Study diagram

For peer review only

**Table 1: Criteria for readiness for ICU discharge**

---

*A patient will be considered ready for ICU discharge when he/she meets all of the following criteria:*

- No longer in need of, or at risk for needing, invasive mechanical ventilation
  - No longer in need of, or at risk for needing, vasoactive support
  - No agitation or altered consciousness requiring close monitoring and management
  - No severe acute metabolic or haematologic disorder requiring close monitoring and management
-

**Table 2: Mobilisation scale**

|                             |                                                                                                                                                                                                |
|-----------------------------|------------------------------------------------------------------------------------------------------------------------------------------------------------------------------------------------|
| <b>Remains in bed</b>       | <ul style="list-style-type: none"><li>▪ no mobilisation,</li><li>▪ turned in bed,</li><li>▪ sitting position in bed with the head of the bed elevated</li></ul>                                |
| <b>Mobilised in the bed</b> | <ul style="list-style-type: none"><li>▪ passive mobilisation of the legs in bed</li><li>▪ active mobilisation of the legs in bed</li><li>▪ cycling motions in bed</li></ul>                    |
| <b>Mobilised out of bed</b> | <ul style="list-style-type: none"><li>▪ sits on the edge of the bed with the feet on the floor</li><li>▪ sits in a chair</li><li>▪ stands</li><li>▪ marches in place</li><li>▪ walks</li></ul> |

**Table 3: Study flow chart of patient follow-up**

|                                                            | Inclusion | D0* | D1 to Dn | End of study protocol | Ready for ICU discharge | D28 | D90 | One year End of follow-up ** |
|------------------------------------------------------------|-----------|-----|----------|-----------------------|-------------------------|-----|-----|------------------------------|
| <b>Eligibility: check inclusion and exclusion criteria</b> | X         |     |          |                       |                         |     |     |                              |
| <b>Patient information and consent</b>                     | X         |     |          |                       |                         |     |     |                              |
| <b>Randomisation</b>                                       |           | X   |          |                       |                         |     |     |                              |
| <b>Demographic characteristics</b>                         |           | X   |          |                       |                         |     |     |                              |
| <b>Vital signs</b>                                         |           | X   |          |                       |                         |     |     |                              |
| <b>Weight</b>                                              |           | X   | X        |                       |                         |     |     |                              |
| <b>Ventilation</b>                                         |           | X   | X        |                       |                         |     |     |                              |
| <b>Laboratory tests</b>                                    |           | X   | X*       |                       |                         |     |     |                              |
| <b>SOFA</b>                                                |           | X   | X        |                       |                         |     |     |                              |
| <b>Nutritional evaluation</b>                              |           | X   | X        |                       |                         |     |     |                              |
| <b>Treatments used</b>                                     |           | X   | X        |                       |                         |     |     |                              |
| <b>Daily nutritional intake</b>                            |           | X   | X        |                       |                         |     |     |                              |
| <b>Fluid intake</b>                                        |           | X   | X        |                       |                         |     |     |                              |
| <b>Nosocomial infections</b>                               |           |     | X        |                       |                         |     |     |                              |
| <b>Final extubation</b>                                    |           |     |          | X                     |                         |     |     |                              |
| <b>Final discontinuation of nutritional support</b>        |           |     |          | X                     |                         |     |     |                              |
| <b>Health status</b>                                       |           |     |          |                       | X                       |     |     |                              |
| <b>MRC score</b>                                           |           |     |          |                       | X                       |     |     |                              |
| <b>Survived / died</b>                                     |           |     |          |                       | X                       | X   | X   | X                            |
| <b>SF-36</b>                                               |           |     |          |                       |                         |     | X   | X                            |

\* from time of inclusion to 11:59 pm

\*\* Information will be collected by phone contact with patients or relatives.

**Figure 1: Study interventions**

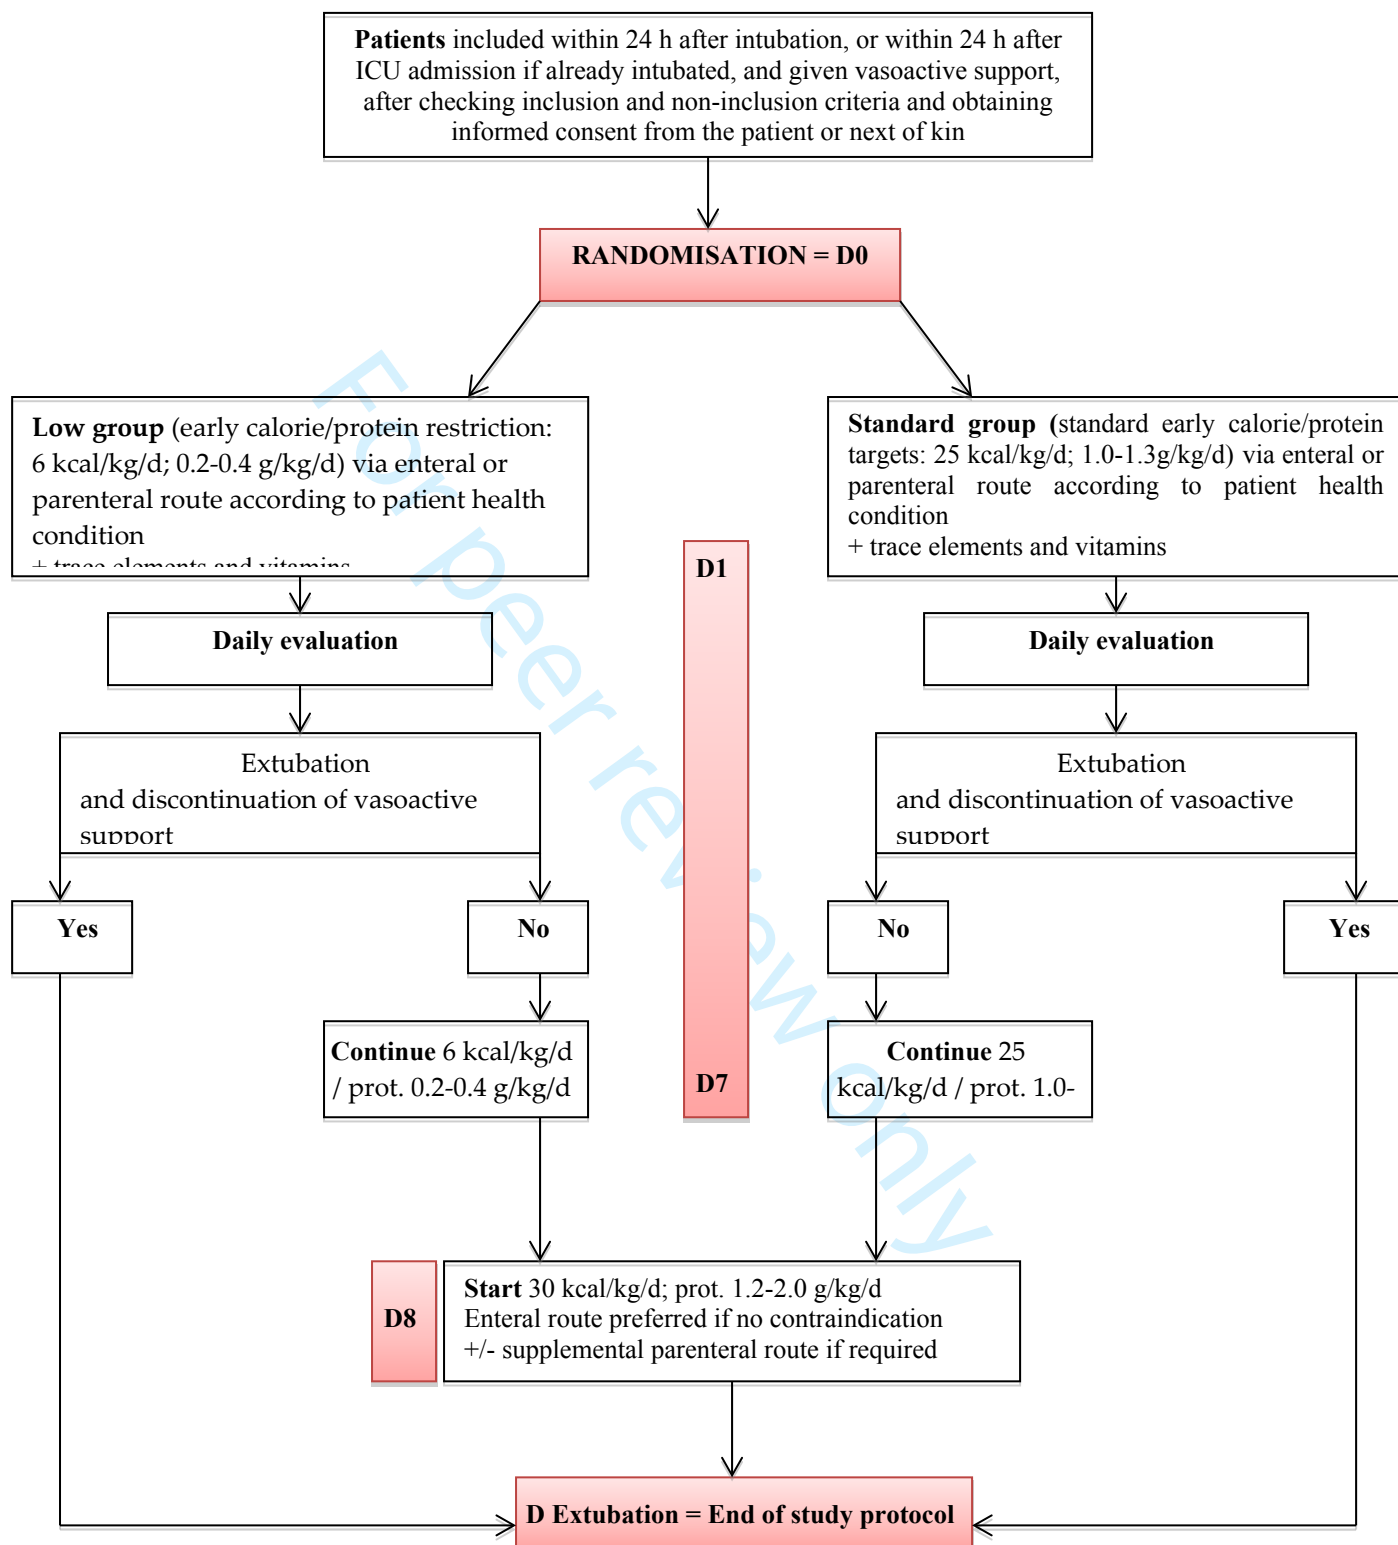

**Figure 2: Study diagram**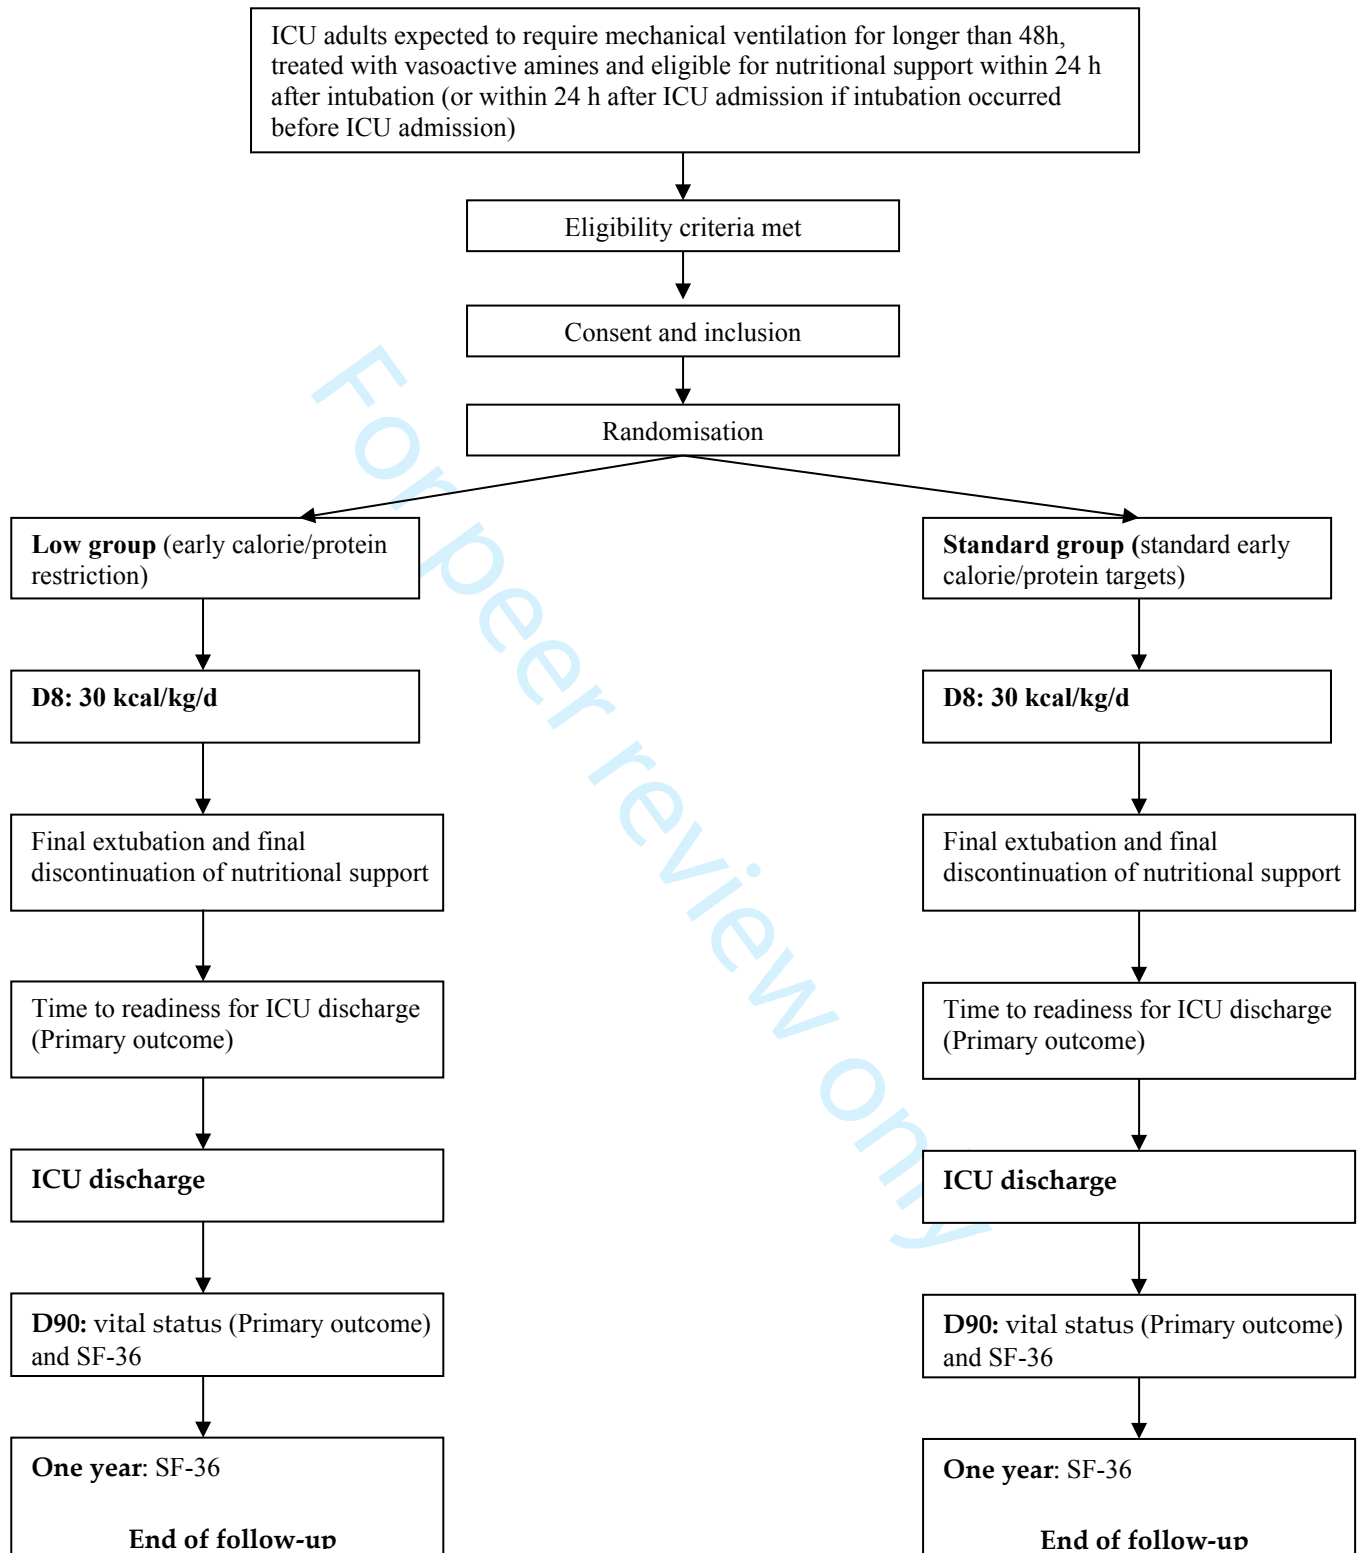

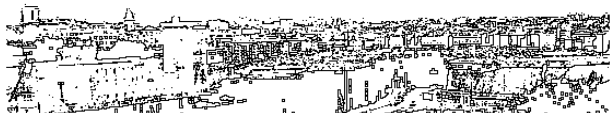

# Comité de Protection des Personnes Sud-Méditerranée II

## AVIS

Le Comité de Protection des Personnes Sud-Méditerranée II, agréé par arrêté ministériel en date du 31 mai 2012, constitué selon l'arrêté du Directeur Général de l'Agence Régionale de Santé de la région Provence Alpes Côte d'Azur en date du 20 avril 2016,

➤ en application des dispositions du Code de la Santé Publique et de la réglementation en vigueur applicables sur un projet de recherche mentionnée au 1° ou au 2° de l'article L. 1121-1 du code de la santé publique ne portant pas sur un produit mentionné à l'article L. 5311-1 du même code

➤ ayant été saisi par le **CHU de Nantes**, promoteur d'un dossier de recherche impliquant la personne humaine intitulée:

### **Impact of early low-calorie low-protein versus standard calorie standards protein feeding on outcomes of ventilated adults with shock : a randomised, controlled, multicentre, open-label, parallel-group, study (NUTRIREA-3)**

Référencée chez le promoteur : **RC18 0006**

Identifiée sous le numéro ID RCB : **2018-A00424-51**

et dont l'investigateur coordonnateur est le **Pr Jean Reignier**.

➤ ayant, après vérification de la conformité réglementaire, enregistré ce dossier le **22/02/2018** sous la référence interne **218 B14**,

➤ ayant examiné ce dossier de recherche lors de sa séance plénière du **06/04/2018** au cours de laquelle

**D. DUSSOL, PH. ROLLAND, V. PRADEL, H. BAGHDADI, C. SICHEL, D. BRAGUER, D. TAILLEFER, J. RICOEUR, G. NAURAYE, P. D'ANGIO . P. BLIEK**

le quorum général étant constaté,

après avoir entendu le rapporteur du collège technique, le rapporteur du collège social et l'avis du méthodologiste ont délibéré,

a décidé de demander au promoteur des compléments d'information et de révisions.

Le Comité,

➤ ayant reçu le **17/04/2018** l'ensemble des informations et des documents demandés,

➤ sur la base du dossier de recherche ainsi constitué :

- Courrier de demande d'autorisation du 14/02/2018
- Lettre de réponse du 17/04/2018
- Lettre de réponse du 16/04/2018
- Formulaire de demande d'autorisation du 17/04/2018



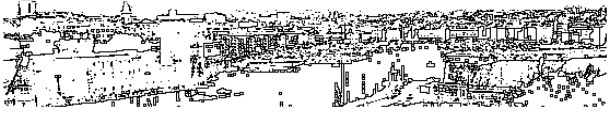

## Comité de Protection des Personnes Sud-Méditerranée II

- Document additionnel du 14/02/2018
- Protocole de recherche v2 du 16/04/2018
- Résumé du protocole en français V2 du 16/04/2018
- Note d'information patient v2 du 16/04/2018
- Note d'information patient A postérieur v2 du 16/04/2018
- Note d'information proche hors procédure d'urgence et formulaire de consentement v2 du 16/04/2018
- Attestation de consentement proche ou personne de confiance
- Attestation de consentement patient
- Attestation de consentement de procédure d'urgence
- CV des investigateurs des principaux de site
- Attestation d'assurance
- Justification d'adéquation des moyens du lieu de recherche

lors de sa séance plénière du **04/05/2018** au cours de laquelle

**C. BAGNIS, PH. ROLLAND, H. BAGHDADI, C. SICHEL, D. BRAGUER, M. RAFFRAY, D. TAILLEFER, J. RICOEUR, M. GABORIAU TABARY, P. D'ANGIO .**

le quorum général étant constaté,

après avoir entendu le rapporteur du collège technique, le rapporteur du collège social et l'avis du méthodologiste ont délibéré,

a émis un

### **AVIS FAVORABLE**

à la mise en oeuvre de cette recherche impliquant la personne humaine, considérant que les conditions de validité de la recherche, notamment celles définies dans l'article L. 1123-7 du code de la santé publique, étaient réunies.

Le Président  
M. Pierre Henri ROLLAND

---

Il appartient au promoteur ou à son mandataire d'informer le Comité de "la date effective de commencement de la recherche correspondant à la date de la signature du consentement par la première personne qui se prête à la recherche en France" (Art. R. Art R1123-40 du Code de la Santé Publique) et « si, dans le délai de deux ans suivant l'avis du comité de protection des personnes, la recherche biomédicale n'a pas débuté, cet avis devient caduc. Toutefois, sur justification produite avant l'expiration dudit délai, celui-ci peut être prorogé par le comité concerné ». (Art R1123-26).

1 PÔLE AFFAIRES MÉDICALES,  
2 RECHERCHE ET STRATÉGIE  
3 TERRITORIALE

4 5, allée de l'Île-Gloriette  
5 44093 Nantes cedex 1

6 DIRECTEUR DU PÔLE  
7 Guillaume Caro

9 AFFAIRES MÉDICALES  
10 ET TERRITORIALES

11 Guillaume Caro  
12 DIRECTEUR

13 T. 02 40 08 72 23

15 SECRÉTAIRE GÉNÉRAL GHT 44

16 T. 02 40 08 72 09

18 RECHERCHE ET INNOVATION

19 Milan Lazarevic  
20 DIRECTEUR

21 Anne Royer-Moes  
22 DIRECTRICE ADJOINTE

23 T. 02 53 48 28 98

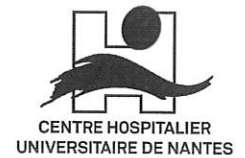

Nantes, october 19<sup>th</sup>, 2020

The University Hospital of Nantes, represented for this paper by the acting Director of Medical Affairs and Research M.Lazarevic by delegation of the chief executive M. El Saïr, certify that the NUTRIREA-3 study

***"Impact of Early Low-Calorie Low-Protein versus Standard-Calorie Standard-Protein Feeding on Outcomes of ventilated adults with shock: a randomised, controlled, multicentre, open-label, parallel-group study (NUTRIREA-3)"***

was supported by the French Ministry of Health under National PHRC call 2017. The principal investigator coordinator of this study is Professor Jean Reingnier, attached to our hospital.

The total amount of this grant is 1 443 324 €.

This information can be checked on the site of DGOS:

<https://solidarites-sante.gouv.fr/systeme-de-sante-et-medico-social/recherche-et-innovation/l-innovation-et-la-recherche-clinique/appels-a-projets/article/les-projets-retenus>

To assert that right.

Milan LAZAREVIC  
A Directeur de la recherche et de  
B l'innovation

PO

Anne OMNES  
CHU

délégation à la recherche clinique  
44093 NANTES CEDEX 1

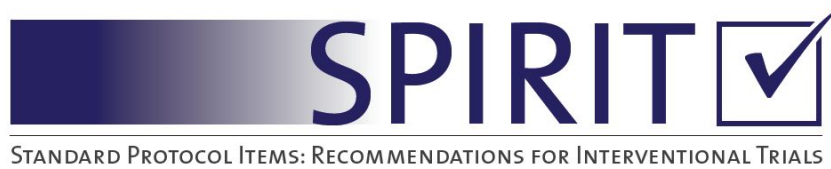

STANDARD PROTOCOL ITEMS: RECOMMENDATIONS FOR INTERVENTIONAL TRIALS

SPIRIT 2013 Checklist: Recommended items to address in a clinical trial protocol and related documents\*

| Section/item                      | Item No | Description                                                                                                                                                                                                                                                                              |
|-----------------------------------|---------|------------------------------------------------------------------------------------------------------------------------------------------------------------------------------------------------------------------------------------------------------------------------------------------|
| <b>Administrative information</b> |         |                                                                                                                                                                                                                                                                                          |
| Title                             | 1       | Descriptive title identifying the study design, population, interventions, and, if applicable, trial acronym                                                                                                                                                                             |
| Trial registration                | 2a      | Trial identifier and registry name. If not yet registered, name of intended registry                                                                                                                                                                                                     |
|                                   | 2b      | All items from the World Health Organization Trial Registration Data Set                                                                                                                                                                                                                 |
| Protocol version                  | 3       | Date and version identifier                                                                                                                                                                                                                                                              |
| Funding                           | 4       | Sources and types of financial, material, and other support                                                                                                                                                                                                                              |
| Roles and responsibilities        | 5a      | Names, affiliations, and roles of protocol contributors                                                                                                                                                                                                                                  |
|                                   | 5b      | Name and contact information for the trial sponsor                                                                                                                                                                                                                                       |
|                                   | 5c      | Role of study sponsor and funders, if any, in study design; collection, management, analysis, and interpretation of data; writing of the report; and the decision to submit the report for publication, including whether they will have ultimate authority over any of these activities |
|                                   | 5d      | Composition, roles, and responsibilities of the coordinating centre, steering committee, endpoint adjudication committee, data management team, and other individuals or groups overseeing the trial, if applicable (see Item 21a for data monitoring committee)                         |
| <b>Introduction</b>               |         |                                                                                                                                                                                                                                                                                          |
| Background and rationale          | 6a      | Description of research question and justification for undertaking the trial, including summary of relevant studies (published and unpublished) examining benefits and harms for each intervention                                                                                       |
|                                   | 6b      | Explanation for choice of comparators                                                                                                                                                                                                                                                    |
| Objectives                        | 7       | Specific objectives or hypotheses                                                                                                                                                                                                                                                        |
| Trial design                      | 8       | Description of trial design including type of trial (eg, parallel group, crossover, factorial, single group), allocation ratio, and framework (eg, superiority, equivalence, noninferiority, exploratory)                                                                                |

## Methods: Participants, interventions, and outcomes

|                      |     |                                                                                                                                                                                                                                                                                                                                                                                |
|----------------------|-----|--------------------------------------------------------------------------------------------------------------------------------------------------------------------------------------------------------------------------------------------------------------------------------------------------------------------------------------------------------------------------------|
| Study setting        | 9   | Description of study settings (eg, community clinic, academic hospital) and list of countries where data will be collected. Reference to where list of study sites can be obtained                                                                                                                                                                                             |
| Eligibility criteria | 10  | Inclusion and exclusion criteria for participants. If applicable, eligibility criteria for study centres and individuals who will perform the interventions (eg, surgeons, psychotherapists)                                                                                                                                                                                   |
| Interventions        | 11a | Interventions for each group with sufficient detail to allow replication, including how and when they will be administered                                                                                                                                                                                                                                                     |
|                      | 11b | Criteria for discontinuing or modifying allocated interventions for a given trial participant (eg, drug dose change in response to harms, participant request, or improving/worsening disease)                                                                                                                                                                                 |
|                      | 11c | Strategies to improve adherence to intervention protocols, and any procedures for monitoring adherence (eg, drug tablet return, laboratory tests)                                                                                                                                                                                                                              |
|                      | 11d | Relevant concomitant care and interventions that are permitted or prohibited during the trial                                                                                                                                                                                                                                                                                  |
| Outcomes             | 12  | Primary, secondary, and other outcomes, including the specific measurement variable (eg, systolic blood pressure), analysis metric (eg, change from baseline, final value, time to event), method of aggregation (eg, median, proportion), and time point for each outcome. Explanation of the clinical relevance of chosen efficacy and harm outcomes is strongly recommended |
| Participant timeline | 13  | Time schedule of enrolment, interventions (including any run-ins and washouts), assessments, and visits for participants. A schematic diagram is highly recommended (see Figure)                                                                                                                                                                                               |
| Sample size          | 14  | Estimated number of participants needed to achieve study objectives and how it was determined, including clinical and statistical assumptions supporting any sample size calculations                                                                                                                                                                                          |
| Recruitment          | 15  | Strategies for achieving adequate participant enrolment to reach target sample size                                                                                                                                                                                                                                                                                            |

## Methods: Assignment of interventions (for controlled trials)

### Allocation:

|                     |     |                                                                                                                                                                                                                                                                                                                                                          |
|---------------------|-----|----------------------------------------------------------------------------------------------------------------------------------------------------------------------------------------------------------------------------------------------------------------------------------------------------------------------------------------------------------|
| Sequence generation | 16a | Method of generating the allocation sequence (eg, computer-generated random numbers), and list of any factors for stratification. To reduce predictability of a random sequence, details of any planned restriction (eg, blocking) should be provided in a separate document that is unavailable to those who enrol participants or assign interventions |
|---------------------|-----|----------------------------------------------------------------------------------------------------------------------------------------------------------------------------------------------------------------------------------------------------------------------------------------------------------------------------------------------------------|

|    |                |     |                                                                         |
|----|----------------|-----|-------------------------------------------------------------------------|
| 1  |                |     |                                                                         |
| 2  | Allocation     | 16b | Mechanism of implementing the allocation sequence (eg, central          |
| 3  | concealment    |     | telephone; sequentially numbered, opaque, sealed envelopes),            |
| 4  | mechanism      |     | describing any steps to conceal the sequence until interventions are    |
| 5  |                |     | assigned                                                                |
| 6  |                |     |                                                                         |
| 7  | Implementation | 16c | Who will generate the allocation sequence, who will enrol participants, |
| 8  |                |     | and who will assign participants to interventions                       |
| 9  |                |     |                                                                         |
| 10 | Blinding       | 17a | Who will be blinded after assignment to interventions (eg, trial        |
| 11 | (masking)      |     | participants, care providers, outcome assessors, data analysts), and    |
| 12 |                |     | how                                                                     |
| 13 |                | 17b | If blinded, circumstances under which unblinding is permissible, and    |
| 14 |                |     | procedure for revealing a participant's allocated intervention during   |
| 15 |                |     | the trial                                                               |
| 16 |                |     |                                                                         |
| 17 |                |     |                                                                         |
| 18 |                |     |                                                                         |
| 19 |                |     |                                                                         |

### Methods: Data collection, management, and analysis

|    |                 |     |                                                                          |
|----|-----------------|-----|--------------------------------------------------------------------------|
| 20 |                 |     |                                                                          |
| 21 | Data collection | 18a | Plans for assessment and collection of outcome, baseline, and other      |
| 22 | methods         |     | trial data, including any related processes to promote data quality (eg, |
| 23 |                 |     | duplicate measurements, training of assessors) and a description of      |
| 24 |                 |     | study instruments (eg, questionnaires, laboratory tests) along with      |
| 25 |                 |     | their reliability and validity, if known. Reference to where data        |
| 26 |                 |     | collection forms can be found, if not in the protocol                    |
| 27 |                 | 18b | Plans to promote participant retention and complete follow-up,           |
| 28 |                 |     | including list of any outcome data to be collected for participants who  |
| 29 |                 |     | discontinue or deviate from intervention protocols                       |
| 30 |                 |     |                                                                          |
| 31 | Data            | 19  | Plans for data entry, coding, security, and storage, including any       |
| 32 | management      |     | related processes to promote data quality (eg, double data entry;        |
| 33 |                 |     | range checks for data values). Reference to where details of data        |
| 34 |                 |     | management procedures can be found, if not in the protocol               |
| 35 |                 |     |                                                                          |
| 36 | Statistical     | 20a | Statistical methods for analysing primary and secondary outcomes.        |
| 37 | methods         |     | Reference to where other details of the statistical analysis plan can be |
| 38 |                 |     | found, if not in the protocol                                            |
| 39 |                 | 20b | Methods for any additional analyses (eg, subgroup and adjusted           |
| 40 |                 |     | analyses)                                                                |
| 41 |                 | 20c | Definition of analysis population relating to protocol non-adherence     |
| 42 |                 |     | (eg, as randomised analysis), and any statistical methods to handle      |
| 43 |                 |     | missing data (eg, multiple imputation)                                   |
| 44 |                 |     |                                                                          |
| 45 |                 |     |                                                                          |
| 46 |                 |     |                                                                          |
| 47 |                 |     |                                                                          |
| 48 |                 |     |                                                                          |
| 49 |                 |     |                                                                          |
| 50 |                 |     |                                                                          |
| 51 |                 |     |                                                                          |

### Methods: Monitoring

|    |                 |     |                                                                      |
|----|-----------------|-----|----------------------------------------------------------------------|
| 52 |                 |     |                                                                      |
| 53 | Data monitoring | 21a | Composition of data monitoring committee (DMC); summary of its role  |
| 54 |                 |     | and reporting structure; statement of whether it is independent from |
| 55 |                 |     | the sponsor and competing interests; and reference to where further  |
| 56 |                 |     | details about its charter can be found, if not in the protocol.      |
| 57 |                 |     | Alternatively, an explanation of why a DMC is not needed             |
| 58 |                 |     |                                                                      |
| 59 |                 |     |                                                                      |
| 60 |                 |     |                                                                      |

|    |          |     |                                                                        |
|----|----------|-----|------------------------------------------------------------------------|
| 1  |          | 21b | Description of any interim analyses and stopping guidelines, including |
| 2  |          |     | who will have access to these interim results and make the final       |
| 3  |          |     | decision to terminate the trial                                        |
| 4  |          |     |                                                                        |
| 5  |          |     |                                                                        |
| 6  | Harms    | 22  | Plans for collecting, assessing, reporting, and managing solicited and |
| 7  |          |     | spontaneously reported adverse events and other unintended effects     |
| 8  |          |     | of trial interventions or trial conduct                                |
| 9  |          |     |                                                                        |
| 10 |          |     |                                                                        |
| 11 | Auditing | 23  | Frequency and procedures for auditing trial conduct, if any, and       |
| 12 |          |     | whether the process will be independent from investigators and the     |
| 13 |          |     | sponsor                                                                |
| 14 |          |     |                                                                        |

### 15 Ethics and dissemination

|    |                   |     |                                                                               |
|----|-------------------|-----|-------------------------------------------------------------------------------|
| 16 |                   |     |                                                                               |
| 17 | Research ethics   | 24  | Plans for seeking research ethics committee/institutional review board        |
| 18 | approval          |     | (REC/IRB) approval                                                            |
| 19 |                   |     |                                                                               |
| 20 |                   |     |                                                                               |
| 21 | Protocol          | 25  | Plans for communicating important protocol modifications (eg,                 |
| 22 | amendments        |     | changes to eligibility criteria, outcomes, analyses) to relevant parties      |
| 23 |                   |     | (eg, investigators, REC/IRBs, trial participants, trial registries, journals, |
| 24 |                   |     | regulators)                                                                   |
| 25 |                   |     |                                                                               |
| 26 | Consent or assent | 26a | Who will obtain informed consent or assent from potential trial               |
| 27 |                   |     | participants or authorised surrogates, and how (see Item 32)                  |
| 28 |                   |     |                                                                               |
| 29 |                   | 26b | Additional consent provisions for collection and use of participant data      |
| 30 |                   |     | and biological specimens in ancillary studies, if applicable                  |
| 31 |                   |     |                                                                               |
| 32 |                   |     |                                                                               |
| 33 | Confidentiality   | 27  | How personal information about potential and enrolled participants will       |
| 34 |                   |     | be collected, shared, and maintained in order to protect confidentiality      |
| 35 |                   |     | before, during, and after the trial                                           |
| 36 |                   |     |                                                                               |
| 37 | Declaration of    | 28  | Financial and other competing interests for principal investigators for       |
| 38 | interests         |     | the overall trial and each study site                                         |
| 39 |                   |     |                                                                               |
| 40 |                   |     |                                                                               |
| 41 | Access to data    | 29  | Statement of who will have access to the final trial dataset, and             |
| 42 |                   |     | disclosure of contractual agreements that limit such access for               |
| 43 |                   |     | investigators                                                                 |
| 44 |                   |     |                                                                               |
| 45 | Ancillary and     | 30  | Provisions, if any, for ancillary and post-trial care, and for                |
| 46 | post-trial care   |     | compensation to those who suffer harm from trial participation                |
| 47 |                   |     |                                                                               |
| 48 | Dissemination     | 31a | Plans for investigators and sponsor to communicate trial results to           |
| 49 | policy            |     | participants, healthcare professionals, the public, and other relevant        |
| 50 |                   |     | groups (eg, via publication, reporting in results databases, or other         |
| 51 |                   |     | data sharing arrangements), including any publication restrictions            |
| 52 |                   |     |                                                                               |
| 53 |                   |     |                                                                               |
| 54 |                   | 31b | Authorship eligibility guidelines and any intended use of professional        |
| 55 |                   |     | writers                                                                       |
| 56 |                   |     |                                                                               |
| 57 |                   | 31c | Plans, if any, for granting public access to the full protocol, participant-  |
| 58 |                   |     | level dataset, and statistical code                                           |
| 59 |                   |     |                                                                               |
| 60 |                   |     |                                                                               |

**Appendices**

|                            |    |                                                                                                                                                                                                |
|----------------------------|----|------------------------------------------------------------------------------------------------------------------------------------------------------------------------------------------------|
| Informed consent materials | 32 | Model consent form and other related documentation given to participants and authorised surrogates                                                                                             |
| Biological specimens       | 33 | Plans for collection, laboratory evaluation, and storage of biological specimens for genetic or molecular analysis in the current trial and for future use in ancillary studies, if applicable |

---

\*It is strongly recommended that this checklist be read in conjunction with the SPIRIT 2013 Explanation & Elaboration for important clarification on the items. Amendments to the protocol should be tracked and dated. The SPIRIT checklist is copyrighted by the SPIRIT Group under the Creative Commons "[Attribution-NonCommercial-NoDerivs 3.0 Unported](#)" license.

For peer review only

# BMJ Open

## Impact of Early Low-Calorie Low-Protein versus Standard-Calorie Standard-Protein Feeding on Outcomes of Ventilated Adults with Shock: Design and Conduct of a Randomised, Controlled, Multicentre, Open-Label, Parallel-Group Trial (NUTRIREA-3)

|                               |                                                                                                                                                                                                                                                                                                                                                                                                                                                                                                                                                                                                                                                                                                                                                                                                                                                                                                                                                                                                                                                                                                                                                                                                                                                                                                                                                                                                                                                                                                                                                                                                                                                                                                                                                                                                                                                                                                                                                        |
|-------------------------------|--------------------------------------------------------------------------------------------------------------------------------------------------------------------------------------------------------------------------------------------------------------------------------------------------------------------------------------------------------------------------------------------------------------------------------------------------------------------------------------------------------------------------------------------------------------------------------------------------------------------------------------------------------------------------------------------------------------------------------------------------------------------------------------------------------------------------------------------------------------------------------------------------------------------------------------------------------------------------------------------------------------------------------------------------------------------------------------------------------------------------------------------------------------------------------------------------------------------------------------------------------------------------------------------------------------------------------------------------------------------------------------------------------------------------------------------------------------------------------------------------------------------------------------------------------------------------------------------------------------------------------------------------------------------------------------------------------------------------------------------------------------------------------------------------------------------------------------------------------------------------------------------------------------------------------------------------------|
| Journal:                      | <i>BMJ Open</i>                                                                                                                                                                                                                                                                                                                                                                                                                                                                                                                                                                                                                                                                                                                                                                                                                                                                                                                                                                                                                                                                                                                                                                                                                                                                                                                                                                                                                                                                                                                                                                                                                                                                                                                                                                                                                                                                                                                                        |
| Manuscript ID                 | bmjopen-2020-045041.R1                                                                                                                                                                                                                                                                                                                                                                                                                                                                                                                                                                                                                                                                                                                                                                                                                                                                                                                                                                                                                                                                                                                                                                                                                                                                                                                                                                                                                                                                                                                                                                                                                                                                                                                                                                                                                                                                                                                                 |
| Article Type:                 | Protocol                                                                                                                                                                                                                                                                                                                                                                                                                                                                                                                                                                                                                                                                                                                                                                                                                                                                                                                                                                                                                                                                                                                                                                                                                                                                                                                                                                                                                                                                                                                                                                                                                                                                                                                                                                                                                                                                                                                                               |
| Date Submitted by the Author: | 16-Mar-2021                                                                                                                                                                                                                                                                                                                                                                                                                                                                                                                                                                                                                                                                                                                                                                                                                                                                                                                                                                                                                                                                                                                                                                                                                                                                                                                                                                                                                                                                                                                                                                                                                                                                                                                                                                                                                                                                                                                                            |
| Complete List of Authors:     | <p>Reignier, Jean; Centre Hospitalier Universitaire de Nantes, Médecine intensive réanimation<br/> Le Gouge, Amélie; Centre Hospitalier Regional Universitaire de Tours, INSERM CIC 1415<br/> Lascarrou, Jean-Baptiste; Centre Hospitalier Universitaire de Nantes, Service de Médecine Intensive Réanimation<br/> annane, djillali; Hôpital Raymond Poincaré, Service de Médecine Intensive Réanimation<br/> Argaud, Laurent Argaud; Centre Hospitalier Universitaire de Lyon, Service de Médecine Intensive Réanimation<br/> Hourmant, Yannick; CHU Nantes, Pôle Anesthésie Réanimations, Service d'Anesthésie Réanimation Chirurgicale<br/> Asfar, Pierre; Centre Hospitalier Universitaire d'Angers, Service de Médecine Intensive Réanimation<br/> Badie, Julio; Hôpital Nord Franche-Comté, Service de Médecine Intensive Réanimation<br/> Nay, Mai-Anh; Centre Hospitalier Régional d'Orleans Hôpital de La Source, Service de Médecine Intensive Réanimation<br/> Botoc, Nicolae-Vlad; Centre Hospitalier de Saint-Malo, Service de Médecine Intensive Réanimation<br/> Brisard, Laurent; CHU Nantes, Service d'Anesthésie Réanimation Chirurgicale<br/> Bui, Hoang-Nam; CHU de Bordeaux, Service de Médecine Intensive Réanimation<br/> Chatellier, Delphine; CHU Poitiers, Service de Médecine Intensive Réanimation<br/> Chauvelot, Louis; CHU Lyon, Service de Médecine Intensive Réanimation<br/> Combes, Alain; Hôpital Universitaire Pitié Salpêtrière, Service de Médecine Intensive Réanimation<br/> Cracco, Christophe; Centre Hospitalier d'Angouleme, Service de Médecine Intensive Réanimation<br/> Darmon, Michael; Hôpital Saint-Louis, Service de Médecine Intensive Réanimation<br/> Das, Vincent; CHI André Grégoire, Médecine Intensive Réanimation<br/> Debarre, Matthieu; Centre Hospitalier de Saint Briec, Médecine Intensive Réanimation<br/> Delbove, Agathe; Centre Hospitalier Bretagne Atlantique, Réanimation</p> |



|    |                                                                            |
|----|----------------------------------------------------------------------------|
| 1  |                                                                            |
| 2  |                                                                            |
| 3  |                                                                            |
| 4  | Polyvalente                                                                |
| 5  | Devaquet, Jérôme; Hôpital Foch, Medical-Surgical Intensive Care Unit       |
| 6  | Voicu, Sebastian; Hopital Lariboisiere, Médecine Intensive Réanimation     |
| 7  | Aissaoui-Balanant, Nadia; Hôpital Europeen Georges-Pompidou -              |
| 8  | Broussais, Médecine Intensive Réanimation                                  |
| 9  | Dumont, Louis-Marie; Hôpital Louis-Mourier, Service de Médecine            |
| 10 | Intensive Réanimation                                                      |
| 11 | Oziel, Johanna; Hôpital Avicenne, Service de Médecine Intensive            |
| 12 | Réanimation                                                                |
| 13 | Gontier, Olivier; Centre Hospitalier de Chartres, Service de Médecine      |
| 14 | Intensive Réanimation                                                      |
| 15 | Groyer, Samuel; Centre Hospitalier de Montauban, Service de Médecine       |
| 16 | Intensive Réanimation                                                      |
| 17 | Guidet, Bertrand ; Hôpital Saint-Antoine, Service de Médecine Intensive    |
| 18 | Réanimation                                                                |
| 19 | Jaber, S.; Hôpital Saint-Eloi, Service de Réanimation chirurgicale         |
| 20 | Lambiotte, Fabien; Centre Hospitalier de Valenciennes, Service de          |
| 21 | Médecine Intensive Réanimation                                             |
| 22 | Leroy, Christophe; Centre Hospitalier Emile Roux, Service de Médecine      |
| 23 | Intensive Réanimation                                                      |
| 24 | Letocart, Philippe; Centre Hospitalier de Rodez, Service de Médecine       |
| 25 | Intensive Réanimation                                                      |
| 26 | Madeux, Benjamin; Centre Hospitalier de Bigorre, Service de Médecine       |
| 27 | Intensive Réanimation                                                      |
| 28 | Maizel, Julien; Centre Hospitalier Universitaire Amiens-Picardie, Service  |
| 29 | de Médecine Intensive Réanimation                                          |
| 30 | Martinet, Olivier; Centre Hospitalier Universitaire de La Réunion, Service |
| 31 | de Médecine Intensive Réanimation                                          |
| 32 | Martino, Frédéric; Centre Hospitalier Universitaire Pointe-à-Pitre Abymes, |
| 33 | Service de Médecine Intensive Réanimation                                  |
| 34 | Mercier, Emmanuelle; Centre Hospitalier Régional Universitaire de Tours,   |
| 35 | Service de Médecine Intensive Réanimation                                  |
| 36 | Mira, Jean-Paul; Hôpital Cochin, Service de Médecine Intensive             |
| 37 | Réanimation                                                                |
| 38 | Nseir, Saad; CHU Lille, Service de Médecine Intensive Réanimation          |
| 39 | Picard, Walter; Centre Hospitalier de Pau, Service de Médecine Intensive   |
| 40 | Réanimation                                                                |
| 41 | Piton, G; Centre Hospitalier Universitaire de Besancon, Service de         |
| 42 | Médecine Intensive Réanimation                                             |
| 43 | Plantefeve, Gaetan; Centre Hospitalier d'Argenteuil, Service de Médecine   |
| 44 | Intensive Réanimation                                                      |
| 45 | Quenot, Jean-Pierre; Centre Hospitalier Universitaire de Dijon, Service    |
| 46 | de Médecine Intensive Réanimation                                          |
| 47 | Renault, Anne; CHRU de Brest, Service de Médecine Intensive                |
| 48 | Réanimation                                                                |
| 49 | Guérin, Laurent; Centre Hospitalier Universitaire de Bicêtre, Service de   |
| 50 | Médecine Intensive Réanimation                                             |
| 51 | Richecoeur, Jack; Centre Hospitalier de Beauvais, Service de Médecine      |
| 52 | Intensive Réanimation                                                      |
| 53 | Rigaud, Jean Philippe; Centre Hospitalier de Dieppe, Service de Médecine   |
| 54 | Intensive Réanimation                                                      |
| 55 | Schneider, Francis; Hopitaux universitaires de Strasbourg, Service de      |
| 56 | Médecine Intensive Réanimation                                             |
| 57 | Silva, Daniel; Centre Hospitalier de Saint Denis, Service de Médecine      |
| 58 | Intensive Réanimation                                                      |
| 59 | Sirodot, Michel; Centre Hospitalier Annecy Genevois, Service de            |
| 60 | Médecine Intensive Réanimation                                             |
|    | Souweine, Bertrand; Centre Hospitalier Universitaire de Clermont-          |
|    | Ferrand, Service de Médecine Intensive Réanimation                         |
|    | Reizine, Florian; Centre Hospitalier Universitaire de Rennes, Service de   |
|    | Médecine Intensive et Réanimation                                          |

|                                 |                                                                                                                                                                                                                                                                                                                                                                                                                                                                                                                                                                                                                                                                                                                                                                                                                                                                                                                                                                                                                                                                                                                                                                                                                                                                                                                                                                             |
|---------------------------------|-----------------------------------------------------------------------------------------------------------------------------------------------------------------------------------------------------------------------------------------------------------------------------------------------------------------------------------------------------------------------------------------------------------------------------------------------------------------------------------------------------------------------------------------------------------------------------------------------------------------------------------------------------------------------------------------------------------------------------------------------------------------------------------------------------------------------------------------------------------------------------------------------------------------------------------------------------------------------------------------------------------------------------------------------------------------------------------------------------------------------------------------------------------------------------------------------------------------------------------------------------------------------------------------------------------------------------------------------------------------------------|
|                                 | Tamion, Fabienne; Centre Hospitalier Universitaire de Rouen, Service de Médecine Intensive Réanimation<br>Terzi, Nicolas ; Centre Hospitalier Universitaire Grenoble Alpes Hopital Michallon, Service de Médecine Intensive Réanimation<br>Thévenin, Didier; Centre Hospitalier de Lens, Service de Médecine Intensive Réanimation<br>Thiéry, Guillaume; Centre Hospitalier Universitaire de Saint-Etienne, Service de Médecine Intensive Réanimation<br>Thieulot-Rolin, Nathalie; Centre Hospitalier de Melun, Service de Médecine Intensive Réanimation<br>Timsit, Jean-François; Hôpital Bichat - Claude-Bernard, Service de Médecine Intensive Réanimation<br>Tinturier, François; Centre Hospitalier Universitaire Amiens-Picardie, Réanimation chirurgicale<br>Tiro, Patrice; Centre Hospitalier du Mans, Service de Médecine Intensive Réanimation<br>Vanderlinden, Thierry; Institut Catholique de Lille, Service de Médecine Intensive Réanimation<br>Vinatier, Isabelle; Centre Hospitalier Départemental Vendée, Service de Médecine Intensive Réanimation<br>Vinsonneau, Christophe; Centre Hospitalier de Béthune, Service de Médecine Intensive Réanimation<br>Maugars, Diane; Centre Hospitalier Universitaire de Nantes, Service de Médecine Intensive Réanimation<br>Giraudeau, Bruno; Centre Hospitalier Régional Universitaire de Tours, Inserm CIC 1415 |
| <b>Primary Subject Heading</b>: | Intensive care                                                                                                                                                                                                                                                                                                                                                                                                                                                                                                                                                                                                                                                                                                                                                                                                                                                                                                                                                                                                                                                                                                                                                                                                                                                                                                                                                              |
| Secondary Subject Heading:      | Nutrition and metabolism                                                                                                                                                                                                                                                                                                                                                                                                                                                                                                                                                                                                                                                                                                                                                                                                                                                                                                                                                                                                                                                                                                                                                                                                                                                                                                                                                    |
| Keywords:                       | Adult intensive & critical care < INTENSIVE & CRITICAL CARE, NUTRITION & DIETETICS, Clinical trials < THERAPEUTICS                                                                                                                                                                                                                                                                                                                                                                                                                                                                                                                                                                                                                                                                                                                                                                                                                                                                                                                                                                                                                                                                                                                                                                                                                                                          |
|                                 |                                                                                                                                                                                                                                                                                                                                                                                                                                                                                                                                                                                                                                                                                                                                                                                                                                                                                                                                                                                                                                                                                                                                                                                                                                                                                                                                                                             |

SCHOLARONE™  
Manuscripts



I, the Submitting Author has the right to grant and does grant on behalf of all authors of the Work (as defined in the below author licence), an exclusive licence and/or a non-exclusive licence for contributions from authors who are: i) UK Crown employees; ii) where BMJ has agreed a CC-BY licence shall apply, and/or iii) in accordance with the terms applicable for US Federal Government officers or employees acting as part of their official duties; on a worldwide, perpetual, irrevocable, royalty-free basis to BMJ Publishing Group Ltd ("BMJ") its licensees and where the relevant Journal is co-owned by BMJ to the co-owners of the Journal, to publish the Work in this journal and any other BMJ products and to exploit all rights, as set out in our [licence](#).

The Submitting Author accepts and understands that any supply made under these terms is made by BMJ to the Submitting Author unless you are acting as an employee on behalf of your employer or a postgraduate student of an affiliated institution which is paying any applicable article publishing charge ("APC") for Open Access articles. Where the Submitting Author wishes to make the Work available on an Open Access basis (and intends to pay the relevant APC), the terms of reuse of such Open Access shall be governed by a Creative Commons licence – details of these licences and which [Creative Commons](#) licence will apply to this Work are set out in our licence referred to above.

Other than as permitted in any relevant BMJ Author's Self Archiving Policies, I confirm this Work has not been accepted for publication elsewhere, is not being considered for publication elsewhere and does not duplicate material already published. I confirm all authors consent to publication of this Work and authorise the granting of this licence.

1  
2  
3 **Impact of Early Low-Calorie Low-Protein versus Standard-Calorie Standard-Protein**  
4  
5 **Feeding on Outcomes of Ventilated Adults with Shock: Design and Conduct of a**  
6  
7 **Randomised, Controlled, Multicentre, Open-Label, Parallel-Group Trial (NUTRIREA-**  
8  
9 **3)**  
10  
11  
12  
13  
14

15 Jean Reignier<sup>1</sup>, Amélie Le Gouge<sup>2</sup>, Jean-Baptiste Lascarrou<sup>1</sup>, Djillali Annane<sup>3</sup>, Laurent  
16 Argaud<sup>4</sup>, Yannick Hourmant<sup>5</sup>, Pierre Asfar<sup>6</sup>, Julio Badie<sup>7</sup>, Mai-Anh Nay<sup>8</sup>, Nicolae-Vlad  
17 Botoc<sup>9</sup>, Laurent Brisard<sup>10</sup>, Hoang-Nam Bui<sup>11</sup>, Delphine Chatellier<sup>12</sup>, Louis Chauvelot<sup>13</sup>,  
18 Alain Combes<sup>14</sup>, Christophe Cracco<sup>15</sup>, Michael Darmon<sup>16</sup>, Vincent Das<sup>17</sup>, Matthieu  
19 Debarre<sup>18</sup>, Agathe Delbove<sup>19</sup>, Jérôme Devaquet<sup>20</sup>, Sebastian Voicu<sup>21</sup>, Nadia Aissaoui-  
20 Balanant<sup>22</sup>, Louis-Marie Dumont<sup>23</sup>, Johanna Oziel<sup>24</sup>, Olivier Gontier<sup>25</sup>, Samuel Groyer<sup>26</sup>,  
21 Bertrand Guidet<sup>27</sup>, Samir Jaber<sup>28</sup>, Fabien Lambiotte<sup>29</sup>, Christophe Leroy<sup>30</sup>, Philippe  
22 Letocart<sup>31</sup>, Benjamin Madeux<sup>32</sup>, Julien Maizel<sup>33</sup>, Olivier Martinet<sup>34</sup>, Frédéric Martino<sup>35</sup>,  
23 Emmanuelle Mercier<sup>36</sup>, Jean-Paul Mira<sup>37</sup>, Saad Nseir<sup>38</sup>, Walter Picard<sup>39</sup>, Gael Piton<sup>40</sup>,  
24 Gaetan Plantefevé<sup>41</sup>, Jean-Pierre Quenot<sup>42</sup>, Anne Renault<sup>43</sup>, Laurent Guérin<sup>44</sup>, Jack  
25 Richecoeur<sup>45</sup>, Jean-Philippe Rigaud<sup>46</sup>, Francis Schneider<sup>47</sup>, Daniel Silva<sup>48</sup>, Michel Sirodot<sup>49</sup>,  
26 Bertrand Souweine<sup>50</sup>, Florian Reizine<sup>51</sup>, Fabienne Tamion<sup>52</sup>, Nicolas Terzi<sup>53</sup>, Didier  
27 Thévenin<sup>54</sup>, Guillaume Thiery<sup>55</sup>, Nathalie Thieulot-Rolin<sup>56</sup>, Jean-Francois Timsit<sup>57</sup>, Francois  
28 Tinturier<sup>58</sup>, Patrice Tirof<sup>59</sup>, Thierry Vanderlinden<sup>60</sup>, Isabelle Vinatier<sup>61</sup>, Christophe  
29 Vinsonneau<sup>62</sup>, Diane Maugars<sup>63</sup>, Bruno Giraudeau<sup>2,64</sup>.  
30  
31  
32  
33  
34  
35  
36  
37  
38  
39  
40  
41  
42  
43  
44  
45  
46  
47  
48  
49

50 <sup>1</sup> Service de Médecine Intensive Réanimation, Centre Hospitalier Universitaire de Nantes,  
51 Nantes, France; Université de Nantes, Nantes, France  
52

53 <sup>2</sup> Inserm CIC 1415, Tours, France; Centre Hospitalier Universitaire de Tours, Tours, France  
54

55 <sup>3</sup> Service de Médecine Intensive Réanimation, Hôpital Raymond Poincaré, Assistance  
56 Publique des Hôpitaux de Paris, Garches, France; Inserm U 1173, Université de Versailles-  
57  
58  
59  
60

1  
2  
3 Saint Quentin en Yvelines, Versailles, France.

4  
5 <sup>4</sup> Service de Médecine Intensive Réanimation, Hôpital Edouard Herriot, Hospices Civils de  
6  
7  
8 Lyon, Lyon, France

9  
10 <sup>5</sup> Laboratoire UPRES EA3826 «Thérapeutiques Cliniques Et Expérimentales Des  
11  
12 Infections», IRS2 - Nantes Biotech, Université De Nantes, Nantes, France; Centre  
13  
14 Hospitalier Universitaire de Nantes, Pôle Anesthésie Réanimations, Service d'Anesthésie  
15  
16 Réanimation Chirurgicale, Hôtel Dieu, Nantes, F-44093, France.

17  
18  
19 <sup>6</sup> Service de Médecine Intensive Réanimation, Centre Hospitalier Universitaire Angers,  
20  
21 Angers, France

22  
23  
24 <sup>7</sup> Service de Médecine Intensive Réanimation, Hôpital Nord Franche Comté, Belfort, France

25  
26 <sup>8</sup>Service de Médecine Intensive Réanimation, Centre Hospitalier Régional d'Orléans,  
27  
28 Orléans, France.

29  
30  
31 <sup>9</sup> Service de Médecine Intensive Réanimation, Centre Hospitalier de Saint Malo, Saint-Malo,  
32  
33 France

34  
35 <sup>10</sup> Service d'Anesthésie Réanimation Chirurgicale, Hopital Laënnec, Centre Hospitalier  
36  
37 Universitaire de Nantes, Nantes, France

38  
39  
40 <sup>11</sup> Service de Médecine Intensive Réanimation, Centre Hospitalier Universitaire de Bordeaux,  
41  
42 Bordeaux, France

43  
44  
45 <sup>12</sup> Service de Médecine Intensive Réanimation, Centre Hospitalier Universitaire de Poitiers,  
46  
47 Poitiers, France

48  
49  
50 <sup>13</sup> Service de Médecine Intensive Réanimation, Hôpital de la Croix Rousse, Hospices Civils  
51  
52 de Lyon, Lyon, France

53  
54 <sup>14</sup> Service de Médecine Intensive Réanimation, Institut de Cardiométabolisme et Nutrition,  
55  
56 Centre Hospitalier Universitaire La Pitié-Salpêtrière, Assistance Publique –Hôpitaux de  
57  
58 Paris, Paris, France; Sorbonne Université, Paris, France

1  
2  
3 15 Service de Médecine Intensive Réanimation, Centre Hospitalier d'Angoulême,  
4  
5 Angoulême, France  
6

7  
8 16 Service de Médecine Intensive Réanimation, Centre Hospitalier Universitaire Saint Louis,  
9  
10 Assistance Publique –Hôpitaux de Paris, Paris, France  
11

12 17 Service de Médecine Intensive Réanimation, Centre Hospitalier Intercommunal André  
13  
14 Grégoire, Montreuil, France  
15

16  
17 18 Service de Médecine Intensive Réanimation, Centre Hospitalier de Saint Briec, Saint  
18  
19 Briec, France  
20

21 19 Service de Médecine Intensive Réanimation, Centre Hospitalier Bretagne-Atlantique,  
22  
23 Vannes, France  
24

25  
26 20 Service de Réanimation polyvalente, Hôpital Foch, Suresnes, France  
27

28 21 Service de Médecine Intensive Réanimation, Centre Hospitalier Universitaire Lariboisière,  
29  
30 Assistance Publique –Hôpitaux de Paris, Paris, France  
31

32  
33 22 Service de Médecine Intensive Réanimation, Hôpital Européen Georges Pompidou,  
34  
35 Assistance Publique –Hôpitaux de Paris, Paris, France  
36

37 23 Service de Médecine Intensive Réanimation, Hôpital Louis-Mourier, Assistance Publique  
38  
39 –Hôpitaux de Paris, Colombes, France  
40

41  
42 24 Service de Médecine Intensive Réanimation, Hôpital Avicenne, Assistance Publique –  
43  
44 Hôpitaux de Paris, Bobigny, France  
45

46  
47 25 Service de Médecine Intensive Réanimation, Centre Hospitalier de Chartres, Chartres,  
48  
49 France  
50

51 26 Service de Médecine Intensive Réanimation, Centre Hospitalier de Montauban,  
52  
53 Montauban, France  
54

55  
56 27 Service de Médecine Intensive Réanimation, Hopital Saint Antoine, Assistance Publique –  
57  
58 Hôpitaux de Paris, Paris, France  
59  
60

- 1  
2  
3 28 Service de Réanimation chirurgicale, Hôpital Saint-Eloi, CHU de Montpellier,  
4  
5 Montpellier, France; PhyMedExp, INSERM, CNRS, Montpellier, France  
6  
7 29 Service de Médecine Intensive Réanimation, Centre Hospitalier de Valenciennes,  
8  
9 Valenciennes, France  
10  
11  
12 30 Service de Médecine Intensive Réanimation, Centre Hospitalier Emile Roux, Le Puy-en-  
13  
14 Velay, France  
15  
16  
17 31 Service de Médecine Intensive Réanimation, Centre Hospitalier Jacques Puel, Rodez,  
18  
19 France  
20  
21 32 Service de Médecine Intensive Réanimation, Centre Hospitalier de Bigorre, Tarbes, France  
22  
23  
24 33 Service de Médecine Intensive Réanimation, Centre Hospitalier Universitaire Amiens-  
25  
26 Picardie, Amiens, France  
27  
28  
29 34 Service de Médecine Intensive Réanimation, Centre Hospitalier Universitaire de la  
30  
31 Réunion, Saint-Denis, La Réunion, France  
32  
33 35 Service de Médecine Intensive Réanimation, Centre Hospitalier Universitaire de Pointe-à-  
34  
35 Pitre-Abymes, Pointe-à-Pitre, Guadeloupe, France  
36  
37  
38 36 Service de Médecine Intensive Réanimation, Centre Hospitalier Universitaire Bretonneau,  
39  
40 CRICS-TRIGGERSEP network Tours, France  
41  
42  
43 37 Service de Médecine Intensive Réanimation, Hôpital Cochin, Groupe Hospitalier Centre-  
44  
45 Université de Paris, Assistance Publique –Hôpitaux de Paris, Paris, France  
46  
47  
48 38 CHU de Lille, Centre de Réanimation, Lille, France; Université de Lille, INSERM U995,  
49  
50 Lille Inflammation Research International Center E2, F-59000 Lille, France  
51  
52 39 Service de Médecine Intensive Réanimation, Centre Hospitalier de Pau, Pau, France  
53  
54  
55 40 Service de Médecine Intensive Réanimation, Centre Hospitalier Universitaire de Besançon,  
56  
57 Besançon, France  
58  
59 41 Service de Médecine Intensive Réanimation, Centre Hospitalier d'Argenteuil, Argenteuil,  
60

1  
2  
3 France

4  
5 <sup>42</sup> Service de Médecine Intensive Réanimation, Centre Hospitalier Universitaire François  
6 Mitterrand, Dijon, France; Lipness Team, INSERM, LabExLipSTIC, Université de  
7 Bourgogne, Dijon, France; INSERM Centres d'Investigation Clinique, Département  
8 d'épidémiologie clinique, Université de Bourgogne, Dijon, France.

9  
10  
11  
12  
13  
14 <sup>43</sup> Service de Médecine Intensive Réanimation, Centre Hospitalier Universitaire La Cavale  
15 Blanche, Brest, France

16  
17  
18  
19 <sup>44</sup> Service de Médecine Intensive Réanimation, Centre Hospitalier Universitaire Bicêtre,  
20 Assistance Publique –Hôpitaux de Paris, Paris, France

21  
22  
23  
24 <sup>45</sup> Service de Médecine Intensive Réanimation, Centre Hospitalier de Beauvais, Beauvais,  
25 France

26  
27  
28 <sup>46</sup> Service de Médecine Intensive Réanimation, Centre Hospitalier de Dieppe, Dieppe, France

29  
30  
31 <sup>47</sup> Service de Médecine Intensive Réanimation, Hôpital de Hautepierre, Centre Hospitalier  
32 Universitaire de Strasbourg, Strasbourg, France.

33  
34  
35 <sup>48</sup> Service de Médecine Intensive Réanimation, Hôpital Delafontaine, Saint-Denis, France

36  
37  
38 <sup>49</sup> Service de Médecine Intensive Réanimation, Centre Hospitalier Annecy Genevois, Pringy,  
39 France

40  
41  
42 <sup>50</sup> Service de Médecine Intensive Réanimation, Centre Hospitalier Universitaire Gabriel-  
43 Montpied, Clermont-Ferrand, France.

44  
45  
46  
47 <sup>51</sup> Service de Médecine Intensive Réanimation, Centre Hospitalier Universitaire de Rennes,  
48 Rennes, France

49  
50  
51 <sup>52</sup> Service de Médecine Intensive Réanimation, Hôpital Charles Nicolle, Centre Hospitalier  
52 Universitaire de Rouen; Normandie Université, UNIROUEN, Inserm U1096, FHU-REMODO-  
53 VHF, Rouen, France  
54  
55  
56  
57  
58  
59  
60



1  
2  
3 5<sup>3</sup> Service de Médecine Intensive Réanimation, Université de Grenoble-Alpes, Grenoble,  
4 France. INSERM 1042, Grenoble, France.

5  
6  
7 5<sup>4</sup> Service de Médecine Intensive Réanimation, Centre Hospitalier de Lens, Lens, France

8  
9  
10 5<sup>5</sup> Service de Médecine Intensive Réanimation, Centre Hospitalier Universitaire de Saint  
11 Etienne, Saint Priest en Jarez, France.

12  
13  
14 5<sup>6</sup> Service de Médecine Intensive Réanimation, Centre Hospitalier Marc Jacquet, Melun,  
15 France

16  
17  
18 5<sup>7</sup> Service de Médecine Intensive Réanimation, Centre Hospitalier Universitaire Bichat-  
19 Claude Bernard, AP-HP, Paris, France; Université Paris, INSERM IAME, U1137, Team  
20 DesCID, Paris, France.

21  
22  
23 5<sup>8</sup> Service de Réanimation Chirurgicale, Centre Hospitalier Universitaire Amiens-Picardie,  
24 Amiens, France

25  
26  
27 5<sup>9</sup> Service de Médecine Intensive Réanimation, Centre Hospitalier du Mans, Le Mans, France

28  
29  
30 6<sup>0</sup> Service de Médecine Intensive Réanimation, Groupe Hospitalier Institut Catholique de  
31 Lille/Faculté Libre de Médecine/Université Lille Nord de France, Lomme, France;

32  
33  
34 6<sup>1</sup> Service de Médecine Intensive Réanimation, Centre Hospitalier Départemental de la  
35 Vendée, La Roche sur Yon, France

36  
37  
38 6<sup>2</sup> Service de Médecine Intensive Réanimation, Centre Hospitalier de Béthune, Béthune,  
39 France

40  
41  
42 6<sup>3</sup> Service de Médecine Intensive Réanimation, Unité d'Investigation Clinique, CHU Nantes,  
43 Nantes, France

44  
45  
46 6<sup>4</sup> Inserm CIC 1415, Tours, France; Université de Tours, Tours, France; CHU Tours, Tours,  
47 France.

1  
2  
3 **Corresponding author:** Professor Jean Reignier, Service de Médecine Intensive  
4  
5 Réanimation, Centre Hospitalier Universitaire Hôtel-Dieu, 30 Bd. Jean Monnet, 44093  
6  
7 Nantes Cedex 1, FRANCE  
8  
9  
10 Phone: + 33 240 087 365  
11  
12 E-mail: [jean.reignier@chu-nantes.fr](mailto:jean.reignier@chu-nantes.fr)  
13  
14  
15  
16  
17  
18

19 **Key words:** Critical illness, nutritional support, mechanical ventilation, shock, calories,  
20  
21 proteins, vasoactive drugs, nosocomial infection  
22  
23  
24  
25

26 **Manuscript Word Count (body only):** 4494 words  
27  
28  
29

30 **Abstract Word Count:** 299  
31  
32  
33  
34  
35  
36  
37  
38  
39  
40  
41  
42  
43  
44  
45  
46  
47  
48  
49  
50  
51  
52  
53  
54  
55  
56  
57  
58  
59  
60

## ABSTRACT

**Introduction:** International guidelines include early nutritional support ( $\leq 48$  h after admission), 20-25 kcal/kg/d, and 1.2-2 g/kg/d protein at the acute phase of critical illness. Recent data challenge the appropriateness of providing standard amounts of calories and protein during acute critical illness. Restricting calorie and protein intakes seemed beneficial, suggesting a role for metabolic pathways such as autophagy, a potential key mechanism in safeguarding cellular integrity, notably in the muscle, during critical illness. However, the optimal calorie and protein supply at the acute phase of severe critical illness remains unknown. NUTRIREA-3 will be the first trial to compare standard calorie and protein feeding complying with guidelines to low-calorie low-protein feeding. We hypothesised that nutritional support with calorie and protein restriction during acute critical illness decreased day-90 mortality and/or dependency on ICU management in mechanically ventilated patients receiving vasoactive amine therapy for shock, compared to standard calorie and protein targets.

**Methods and analysis:** NUTRIREA-3 is a randomised, controlled, multicentre, open-label trial comparing two parallel groups of patients receiving invasive mechanical ventilation and vasoactive amine therapy for shock and given early nutritional support according to one of two strategies: early calorie-protein restriction (6 kcal/kg/d-0.2-0.4 g/kg/d) or standard calorie-protein targets (25 kcal/kg/d-1.0-1.3g/kg/d) at the acute phase defined as the first 7 days in the ICU. We will include 3044 patients in 61 French ICUs. Two primary end-points will be evaluated: day-90 mortality and time to ICU discharge readiness. The trial will be considered positive if significant between-group differences are found for one or both alternative primary endpoints. Secondary outcomes include hospital-acquired infections and nutritional, clinical, and functional outcomes.

1  
2  
3 **Ethics and dissemination:** The NUTRIREA-3 study has been approved by the appropriate  
4 ethics committee. Patients are included after informed consent. Results will be submitted for  
5 publication in peer-reviewed journals.  
6  
7  
8  
9

10 **Trial Registration:** ClinicalTrials.gov: NCT03573739. Date of registration: June 29, 2018.  
11  
12  
13  
14  
15  
16  
17  
18  
19  
20  
21  
22  
23  
24  
25  
26  
27  
28  
29  
30  
31  
32  
33  
34  
35  
36  
37  
38  
39  
40  
41  
42  
43  
44  
45  
46  
47  
48  
49  
50  
51  
52  
53  
54  
55  
56  
57  
58  
59  
60

For peer review only

## STRENGTHS AND LIMITATIONS OF THIS STUDY

- NUTRIREA-3 is a pragmatic randomised controlled trial whose large number of patients recruited in numerous intensive care units (ICUs) enhance the reliability and general applicability of the results.
- We included a well-defined population of very severely critically ill patients requiring at least vasoactive drugs and mechanical ventilation, at high risk for death or protracted recovery, and therefore most likely to benefit from improved early nutritional support.
- We used two strong patient-centred primary outcomes, i.e., 90-day mortality and ICU dependency, and we evaluated important secondary outcomes, including long-term function, in keeping with recommendations about studies of nutritional support in critically ill patients.
- NUTRIREA-3 is the first study to evaluate the potential benefits of calorie and protein restriction versus standard calorie and protein targets during early nutritional support, using very different amounts of calories and proteins.
- A limitation is that blinding of nutritional strategies is not feasible.

## INTRODUCTION

Severe critical illness is associated during the acute phase with anorexia, metabolic disorders, endocrine dysfunction, and a major catabolic response responsible for severe skeletal and diaphragmatic muscle wasting(1). Among critically ill patients requiring mechanical ventilation (MV) and catecholamines for shock, nearly 40% to 50% die, and functional recovery is often delayed in survivors (2). Nutritional support is crucial, as malnutrition is associated with poor outcomes. Prescribing nutritional support in the critically ill is the result of a complex decision-making process designed to optimise three key parameters: the timing, the dose, and the route of artificial feeding. International guidelines encourage early nutritional support ( $\leq 48$  h after admission), via the enteral route if not contraindicated, with 20-25 kcal/kg/d, and 1.2-2 g/kg/d protein at the acute phase(3, 4). These targets are rarely achieved in patients with severe critical illnesses, who frequently experience gastroparesis responsible for intolerance to enteral nutrition(5). Observational studies have indicated that calorie and protein deficiencies were associated with nosocomial infections, ICU-acquired weakness, delayed weaning off MV, longer stays, and higher mortality(6-12).

However, recent data challenge the appropriateness of providing standard amounts of calories and protein during the acute phase of critical illness(13, 14). Studies showed no outcome benefits with higher intakes(15, 16). Instead, adding parenteral nutrition to increase intakes was associated with longer ICU stays and more infectious complications(17, 18). Higher protein intakes during the acute phase may be associated with greater muscle wasting and ICU-acquired weakness(1, 19). Restricting calorie and protein intakes seemed beneficial, suggesting a role for metabolic pathways such as autophagy, a potential key mechanism in safeguarding cellular integrity, notably in the muscle, during critical illness(20, 21). The recent EDEN and PERMIT trials showed no differences in patient outcomes between

1  
2  
3 hypocaloric and standard feeding(22-24). However, in both studies, calorie intakes were  
4  
5 below-target in the standard groups. Moreover, patients in both PERMIT trial groups  
6  
7 received similar protein intakes, as protein solutions were added in the hypocaloric group.  
8  
9  
10 Last, the TARGET trial demonstrated no benefit of delivering 100% vs. 70% of the  
11  
12 recommended calorie intake on outcomes of critically ill patients(25). Thus, the optimal  
13  
14 calorie and protein supply at the acute phase of severe critical illness remains unknown(14,  
15  
16 26-29).

17  
18  
19 We designed the NUTRIREA-3 trial to compare standard calorie and protein feeding  
20  
21 complying with guidelines to low-calorie low-protein feeding in a well-defined group of  
22  
23 severely ill ICU patients requiring at least MV and vasoactive drugs. These patients typically  
24  
25 have poor outcomes with long ICU stays, high frequencies of ICU-acquired weakness and  
26  
27 infections, and high mortality(1, 30). Reported impacts of nutritional support were greatest in  
28  
29 the most severely ill ICU patients (3, 4, 31, 32). Our hypothesis is that, in those severe  
30  
31 critically ill patients, low-calorie low-protein feeding at the early phase of critical illness  
32  
33 improves muscle preservation, thereby improving outcomes, and most notably diminishing  
34  
35 mortality and dependency on ICU care.  
36  
37  
38  
39  
40  
41  
42  
43  
44  
45  
46  
47  
48  
49  
50  
51  
52  
53  
54  
55  
56  
57  
58  
59  
60

## METHODS AND ANALYSIS

### Trial design

NUTRIREA-3 is a randomised, controlled, multicentre, open-label trial comparing two parallel groups of patients.

### Participants, interventions, outcomes

#### *Participating units*

Of the 61 French ICUs participating in the study, 34 are in university hospitals. All participating ICU staff members have attended training in the study procedures and protocols for providing nutritional support.

#### *Study population and recruitment modalities*

*Inclusion criteria* are age older than 18 years; invasive MV for an expected duration of at least 48 hours after inclusion, started in the ICU within the past 24 h, or started before ICU admission with ICU admission within the 24 h after intubation; treatment with a vasoactive agent for shock (adrenaline, dobutamine, or noradrenaline); nutritional support expected to be started within 24 h after intubation or within 24 h after ICU admission when MV was started before ICU admission; and patient and/or next-of-kin informed about the study and having consented to participation in the study. If the patient is unable to receive information and no next-of-kin can be contacted during screening for the study, trial inclusion will be completed as an emergency procedure by the ICU physician, in compliance with French law.

*Exclusion criteria* are specific nutritional needs, such as pre-existing long-term home enteral or parenteral nutrition, for chronic bowel disease; dying patient, not-to-be-resuscitated



1  
2  
3 order, or other treatment limitation decision at ICU admission; pregnancy, recent delivery, or  
4  
5 lactation; adult under guardianship; and department of corrections inmate.  
6  
7  
8  
9

### 10 ***Interventions***

11  
12 After study inclusion, patients will be allocated at random to one of two nutritional  
13 support strategies (Figure 1). The designated feeding strategy will be initiated as soon as  
14 possible after randomisation (in all patients, within 24 hours after intubation or ICU  
15 admission in patients with MV started before admission) and continued until extubation and  
16 withdrawal of vasoactive support, or death, or day 7, whichever occurs first.  
17  
18  
19  
20  
21  
22  
23

24 In the low-calorie low-protein (Low) group, the calorie target will be 6 kcal/kg/day  
25 and the protein target 0.2-0.4 g/kg/d during the acute phase, i.e. from D0 to D7. On D8, the  
26 calorie target will be 30 kcal/kg/d and the protein target 1.2-2.0 g/kg/d.  
27  
28  
29

30 In the standard-calorie/standard-protein (Standard) group, the first-line calorie target  
31 calculated based on body weight is 25 kcal/kg/day and the protein target 1.0-1.3 g/kg/d  
32 during the acute phase, i.e. from D0 to D7. On D8, the calorie target will be 30 kcal/kg/d and  
33 the protein target 1.2-2.0 g/kg/d.  
34  
35  
36  
37  
38  
39

40 Daily nutritional intakes needed to meet the allocated calorie target will be calculated  
41 based on body weight (BW). In obese patients (BMI>30 Kg/m<sup>2</sup>), the body weight yielding a  
42 BMI of 30 will be used. In patients with BMI<18.5, the following corrected body weight will  
43 be used: (ideal body weight + actual body weight)/2. The calorie/protein ratios of nutritional  
44 solutions currently available in French hospitals will ensure that the protein intake complies  
45 with the allocated nutritional regimen.  
46  
47  
48  
49  
50  
51  
52  
53  
54  
55

### 56 ***Nutritional support protocol***

1  
2  
3 The nutritional support protocol, including measures designed to evaluate tolerance,  
4 is standardised as indicated below.  
5  
6

7  
8 *General principles of nutritional support in both study arms*  
9

10 Nutritional support is started as soon as possible after randomisation and no later than  
11 24 hours after intubation or after ICU admission if intubation preceded ICU admission.  
12  
13

14 Randomised controlled trials showed that feeding route during the acute phase had no  
15 impact on major clinical outcomes of critically ill patients when iso-caloric nutrition was  
16 provided in both arms(33, 34). Thus, during the acute phase, bedside physicians will be free,  
17 each day, to choose the best feeding route, according to clinical considerations, to ensure that  
18 the calorie target is achieved. After the acute phase, enteral feeding remains the preferred  
19 route in patients without contraindications (4). Thus, on day 8, in the absence of  
20 contraindications to enteral nutrition, parenteral nutrition will be stopped in those patients fed  
21 via the parenteral route, and enteral nutrition started. From day 8 onwards, supplemental  
22 parenteral nutrition may be added in the event of intolerance to enteral nutrition precluding  
23 the achievement of the predefined calorie targets.  
24  
25  
26  
27  
28  
29  
30  
31  
32  
33  
34  
35  
36

37 Nutritional support is prescribed as a flow rate (mL/hour) and started at the prescribed  
38 flow rate (as opposed to increased gradually). The feed is delivered continuously over the 24-  
39 hour cycle, with no interruptions. Actual feed delivery is monitored regularly based on the  
40 volumes delivered relative to the predefined daily calorie targets. In addition, special  
41 attention is directed to avoiding delays. Any interruption in feed delivery is reported to the  
42 ICU physician in charge. Except in special situations, nutritional support is not interrupted  
43 while transporting the patient. However, when EN or PN must be interrupted (e.g., for a  
44 specific gastrointestinal or radiological investigation), the flow rate is not increased to  
45 compensate for the interruption. Finally, all patients are in the semi-recumbent supine  
46 position (torso inclined 30° to 45° relative to the horizontal plane).  
47  
48  
49  
50  
51  
52  
53  
54  
55  
56  
57  
58  
59  
60

1  
2  
3 After extubation, regardless of time since randomisation, decisions about the  
4 continued need for, and optimal route of, nutritional support are made by the physician in  
5 charge of the patient. Patients who are reintubated within 7 days after trial inclusion are  
6 managed until the end of the acute phase according to the arm they were randomised to  
7 during the first intubation period.  
8  
9

#### 14 *Enteral nutrition (EN)*

15  
16  
17 Iso-osmotic iso-caloric normal-protein polymeric preparations are used during the  
18 first week in both groups, after which the choice of feed is at the discretion of the physician.  
19 The feed is delivered via a 14-French silicone gastric tube. Tube position in the middle of the  
20 stomach is checked on a radiograph obtained at ICU admission or immediately after tube  
21 placement, as well as when the tube is changed or repositioned.  
22  
23  
24  
25  
26  
27

28  
29 A predefined protocol is used to manage upper gastrointestinal intolerance to enteral  
30 nutrition. This protocol was used in the NUTRIREA-2 trial(34). To minimise the risk of  
31 gastric intolerance and consequently of vomiting, the volume of supplemental water given  
32 enterally will be as small as possible during the first study week. Residual gastric volume is  
33 not monitored(35). The tolerance of enteral nutrition is defined based only on episodes of  
34 significant vomiting or regurgitation (passage of enteral nutrition formula into the mouth,  
35 outside the mouth, or into the endotracheal tube in the absence of care procedures or  
36 mobilisation). Minimal regurgitation or vomiting triggered by tracheal aspiration or oral  
37 cavity care is not taken to indicate intolerance. EN intolerance leads to the following two  
38 measures. First, treatment with a prokinetic agent is initiated after confirmation that there are  
39 no contraindications. The study ICUs use the prokinetic agent of their choice, according to  
40 their standard practice. The prokinetic agent is discontinued when EN at the highest  
41 prescribed flow rate has been well tolerated for 48 hours. Second, if gastric intolerance  
42 persists despite prokinetic therapy, the flow rate is decreased by 25 mL/h every 6 hours until  
43  
44  
45  
46  
47  
48  
49  
50  
51  
52  
53  
54  
55  
56  
57  
58  
59  
60

1  
2  
3 the signs of intolerance resolve. Therefore, EN is stopped (and the gastric tube placed under  
4 suction) only in patients with intolerance despite a flow rate  $\leq 25$  mL/h. All interruptions in  
5 EN delivery must be reported to the physician in charge of the patient. This precaution is  
6 particularly important in patients receiving insulin. EN is resumed at the prescribed flow rate  
7 (appropriate to the patient's needs) after 6 hours have elapsed with no further signs of  
8 intolerance. Patients at high risk for gastric intolerance, such as those turned in the prone  
9 position for acute respiratory distress syndrome (ARDS), receive prophylactic prokinetic  
10 treatment starting at the first turn in the prone position (36, 37).

### 21 *Parenteral nutrition (PN)*

22 Ternary admixtures packaged in bags and containing the three groups of  
23 macronutrients are used according to standard practice in each participating centre.  
24 Supplemental electrolytes are supplied in a solution separate from the parenteral feed,  
25 according to the needs of each patient. PN is delivered continuously via a central venous  
26 catheter (CVC). Special attention is directed to preventing infections by complying with the  
27 standard protocols for CVC insertion and maintenance used in each of the participating  
28 centres. Proper CVC position is checked on a radiograph.

### 39 *Additional intakes*

40 Additional water, electrolytes, vitamins, and trace elements are given intravenously  
41 according to the needs of each individual patient as assessed by the physician in charge and  
42 using the standard preparations and protocols available in each study ICU.

### 49 *Monitoring of intestinal transit*

50 The volume and appearance of the stools are monitored daily. The occurrence of  
51 constipation (no stool for more than 6 days) or diarrhoea (more than 300 mL of liquid stool  
52 or 4 loose stools per day) will be reported and will lead to the appropriate diagnostic and  
53 therapeutic management (15, 38, 39). Enteral nutrition is not stopped for diarrhoea, which  
54  
55  
56  
57  
58  
59  
60

1  
2  
3 leads to the following measures. First, treatments that accelerate bowel transit, including  
4 prokinetic agents, are stopped. Second, a stool test for *Clostridium difficile* toxin is  
5 performed in patients receiving antibiotics. Third, the enteral solution is changed if the first  
6 measure is ineffective and the *C. difficile* toxin test is negative. Finally, if the diarrhoea  
7 persists despite the measures listed above, the rate of enteral feeding is reduced until the  
8 diarrhoea resolves then increased again gradually until the desired flow rate (40).  
9  
10  
11  
12  
13  
14  
15

### 16 *Blood glucose control*

17  
18  
19 Close monitoring and strict application of the blood glucose-control and insulin-  
20 therapy protocols used at each study centre will be ensured. Blood glucose targets will be at  
21 the discretion of each physician in charge, according to the usual practice and protocols in  
22 their ICU. In patients receiving insulin therapy, blood glucose levels will be determined at  
23 least hourly if nutritional support is discontinued or decreased (because of poor tolerance of  
24 enteral nutrition) for as long as the patient remains intolerant to, or off, nutrition.  
25  
26  
27  
28  
29  
30  
31  
32  
33  
34

### 35 *Study outcomes*

#### 36 *Primary endpoints*

37  
38  
39 Two primary end-points will be analysed: all-cause mortality by day 90, and time to  
40 readiness for ICU discharge. Information on vital status will be collected on the 90<sup>th</sup> day after  
41 patient inclusion. For discharged patients, information on this primary endpoint will be  
42 collected by a telephone call to the patient's home. The time of ICU discharge to a regular  
43 ward may be affected by the availability of beds on regular wards, which may induce bias.  
44  
45  
46  
47  
48  
49  
50  
51  
52  
53  
54  
55  
56  
57  
58  
59  
60  
The study will therefore consider the time to readiness for ICU discharge. A patient will be  
considered ready for ICU discharge as soon as all predefined clinical conditions for ICU  
discharge are fulfilled (Table 1), regardless of ward-bed availability. Readiness for ICU  
discharge will be checked daily in all patients weaned from invasive MV and vasoactive

1  
2  
3 drugs. A similar strategy regarding this endpoint has been used previously in studies on  
4  
5 nutrition in the ICU(17, 18).  
6

7  
8 The trial will be considered positive if significant between-group differences are  
9  
10 found for one or both alternative primary endpoints.  
11

### 12 *Secondary outcomes*

13  
14 – Daily mean values during the first week, throughout the time on endotracheal  
15  
16 mechanical ventilation (MV) and from weaning off MV to readiness for ICU discharge of the  
17  
18 following:  
19

- 20  
21     ▪ number of calories (in Kcal) delivered enterally and/or  
22  
23     parenterally
- 24  
25     ▪ ratio (as a %) of prescribed over delivered calories
- 26  
27 – Proportion of patients who achieved their calorie target from day 0 to day 7
- 28  
29 – Daily mean values from day 0 to day 7 and during MV of the following:  
30  
31     ▪ protein supply (g) given enterally and/or parenterally  
32  
33     ▪ volume of fluids (in mL) received (daily mean from day 0 to  
34  
35     day 7 and during MV)
- 36  
37 – From day 0 to day 7:  
38  
39     ▪ SOFA score changes
- 40  
41     ▪ Changes in daily maximum blood glucose levels
- 42  
43     ▪ Proportion of patients with hypoglycaemia
- 44  
45     ▪ Total insulin dose received daily
- 46  
47 – Days on insulin treatment from day 0 to readiness for ICU discharge
- 48  
49 – Proportion of patients with at least one ICU-acquired infection; an independent
- 50  
51  
52  
53

54  
55  
56 blinded committee will adjudicate all ICU-acquired infections.  
57  
58  
59  
60

1  
2  
3 – Ventilator-associated pneumonia (VAP): the diagnosis of VAP is suspected based on  
4 the development or persistence of lung infiltrates on the chest radiograph with at least two of  
5 the following criteria: body temperature  $\geq 38.5$  or  $\leq 35.5^\circ\text{C}$ , leucocytosis ( $>10\,000/\text{mm}^3$ ) or  
6 leucopenia ( $<4000/\text{mm}^3$ ), and purulent tracheobronchial aspirate, from H48 after intubation  
7 to H48 after extubation. The diagnosis will have to be confirmed by a positive *semi-*  
8 *quantitative* bacteriological test: bronchoalveolar lavage ( $>10^{-4}$  cfu/mL), brush ( $>10^{-3}$   
9 cfu/mL), tracheal aspirate ( $>10^{-6}$  cfu/mL), or protected distal specimen ( $>10^{-3}$  cfu/mL)(41,  
10 42). VAP episodes are recorded from 48 hours after intubation until day 2 after extubation.

- 11
  - 12
  - 13
  - 14
  - 15
  - 16
  - 17
  - 18
  - 19
  - 20
  - 21
    - 22
    - 23
    - 24
    - 25
    - 26
    - 27
    - 28
    - 29
    - 30
    - 31
    - 32
    - 33
    - 34
    - 35
    - 36
    - 37
    - 38
    - 39
    - 40
    - 41
    - 42
    - 43
    - 44
    - 45
    - 46
    - 47
    - 48
    - 49
    - 50
    - 51
    - 52
    - 53
    - 54
    - 55
    - 56
    - 57
    - 58
    - 59
    - 60
- Other ICU-acquired infections:
    - Proportion of patients with at least one VAP episode
    - Total number of VAP episodes in each group
  - Other ICU-acquired infections:
    - Proportion of patients with at least one episode of bacteraemia
    - Proportion of patients with at least one central venous catheter (CVC)-related infection
    - Proportion of patients with at least one episode of urinary tract infection
    - Proportion of patients with at least one soft tissue infection
    - Proportion of patients with other nosocomial infections
  - Descriptive bacteriological data: organisms recovered in the overall population with nosocomial infections, and antimicrobial resistance profiles
  - Proportion of patients with at least one episode of liver dysfunction, defined as serum bilirubin  $>50\ \mu\text{mol/L}$  and/or elevation  $>3\text{N}$  of one or more liver enzymes ( $\gamma$ -glutamyltransferase, alkaline phosphatase, and ASAT-ALAT) at the end of MV, on day 7 (in patients on MV for more than 7 days), and at ICU discharge

- 1  
2  
3 – Proportion of patients with at least one episode of vomiting or regurgitation while on  
4  
5 MV  
6  
7 – Proportion of patients with at least one episode of diarrhoea defined as liquid stools in  
8  
9 a volume greater than 300 mL/24 hours in patients with a faecal collector or as more than  
10  
11 four loose stools/24 hours (15)  
12  
13 – Proportion of patients with at least one episode of constipation (no stool for more than  
14  
15 6 days)  
16  
17 – Proportion of patients with at least one documented episode of bowel ischaemia  
18  
19 defined as absent blood flow in one of the main arteries supplying the bowel (superior  
20  
21 mesenteric artery, inferior mesenteric artery, or celiac artery) with evidence of bowel wall  
22  
23 compromise on an imaging study (computed tomography angiography, angiography, or  
24  
25 magnetic resonance angiography) or presence of criteria for colonic ischaemia according to  
26  
27 the Favier classification system (stage I, petechiae; stage II, petechiae and superficial ulcers;  
28  
29 and stage III, necrotic ulcers and polypoid lesions) by endoscopy (rectosigmoidoscopy or  
30  
31 colonoscopy) (43)  
32  
33 – Mean changes in serum albumin, pre-albumin, and C-reactive protein (CRP)  
34  
35 measured at baseline, at the end of MV, on day 7 (in patients on MV for more than 7 days),  
36  
37 and at ICU discharge  
38  
39 – Changes in mean body weight determined at baseline, on day 7, and at ICU discharge  
40  
41  
42 – Days on MV  
43  
44 – Hospital stay length (days in hospital)  
45  
46  
47 – ICU mortality, 28-day mortality, and hospital mortality  
48  
49  
50 – Proportions of patients mobilised from day 0 to day 7 and total number of active  
51  
52 mobilisations, using predetermined criteria (44) (Table 2)  
53  
54  
55  
56  
57  
58  
59  
60



1  
2  
3 – Total Medical Research Council (MRC) score and proportion of patients with ICU-  
4 acquired paresis at the time of readiness for ICU discharge (45, 46); the MRC score can  
5 range from 0 (quadriplegia) to 60 (normal muscle strength); scores <48 will define ICU-  
6 acquired paresis.  
7  
8  
9

10  
11  
12 – Proportion of patients with at least one criterion for persistent altered health status at  
13 the time of readiness for ICU discharge, among the following: tracheostomy, non-invasive  
14 ventilation, ongoing renal-replacement therapy, parenteral nutrition, enteral nutrition via a  
15 nasogastric tube; Glasgow Coma Scale score <15, and treatment-limitation decision(47)  
16  
17  
18

19 – SF-36 score completed during a phone call to the patient by an independent blinded  
20 research nurse or psychologist 3 months and 1 year after study inclusion(48, 49)  
21  
22  
23  
24  
25  
26  
27

## 28 **Organisation of the trial**

29  
30 Figure 2 is the study diagram.  
31  
32

## 33 ***Recruitment modalities***

34  
35 All patients treated with invasive MV and vasopressor support for shock within 24 h  
36 after intubation, or within 24 h after ICU admission if already intubated, will be screened for  
37 eligibility by the ICU physicians and clinical research nurses, around the clock and 7 days a  
38 week. Patients will be included after checking inclusion and non-inclusion criteria. A log of  
39 patients considered for study participation will be kept and will include any reasons for non-  
40 inclusion and refusals of consent.  
41  
42  
43  
44  
45  
46  
47  
48  
49

## 50 ***Randomisation***

51  
52 Randomisation is centralised and performed using a secure, computer-generated,  
53 interactive, web-response system available at each study centre. Randomisation is stratified  
54 on study centre with a 1:1 ratio.  
55  
56  
57  
58  
59  
60

### ***Blinding***

The trial will be open, since the nature of the intervention precludes blinding of healthcare staff to group assignment. However, the absence of blinding cannot have an impact on either of the primary endpoints. Day-90 mortality is an objective endpoint with no evidence that absence of blinding may affect the data(50). Given its more subjective nature, the primary endpoint of readiness to discharge alive from the ICU will be checked daily by the bedside physician according to predefined criteria, in order to strongly limit the risk of detection bias. Moreover, the secondary endpoints relevant to nosocomial infections will be validated by an adjudication committee.

### ***Sample size***

Assuming a 43% day-90 mortality rate in the Standard group and a 5% absolute decrease in day-90 mortality (to 38%) in the Low group, with the alpha risk set at 4.9% (as two interim analyses are planned) and the beta risk at 20%, 1522 patients are needed in each group, i.e., a theoretical total of 3044 patients.

This sample size will provide 94% power to detect a 1.5-day difference in time to ICU discharge alive between the two groups (mean, 14.5 days in the control group versus 13.0 days in the experimental group).

No corrections will be made for multiple comparisons. Indeed, adjusting for multiplicity is controversial and there is no consensus about the appropriate analysis (51). Moreover, adjusting for multiplicity may lead to increased sample size and subsequent decreased feasibility of the study. Last, most recent studies with a similar design did not use corrections for multiple comparisons (17, 18).

The ICU stay lengths in survivors and mortality rates used for the sample size estimation

1  
2  
3 are those obtained in the NUTRIREA-1 and -2 trials, which used similar inclusion criteria.  
4  
5  
6

### 7 8 ***Interim analysis*** 9

10 Given the need for a large sample size, two interim analyses will be scheduled, one  
11 after enrolment of 1000 patients and the other after enrolment of 2000 patients. Members of  
12 the independent Data Safety Monitoring Board (DSMB) will not be otherwise involved in the  
13 trial. This DSMB consists of one methodologist and two intensivists. For both interim  
14 analyses, the DSMB will have access to unblinded results on day-90 mortality, time to  
15 discharge alive from the ICU, variations in SOFA scores from day 0 to day 7, amounts of  
16 calories and proteins received daily from day 0 to day 7, and nosocomial infections. The  
17 results of the interim analyses will not be disclosed unless they lead the DSMB to request  
18 premature trial discontinuation.  
19  
20  
21  
22  
23  
24  
25  
26  
27  
28  
29  
30  
31  
32

### 33 ***Statistical analysis*** 34

35 Each patient will remain in the group assigned by randomisation, regardless of  
36 subsequent events. A statistical analysis report will be written to describe all the findings,  
37 according to CONSORT Statement recommendations, while taking into account the specific  
38 features of the trial, most notably the nonpharmacological nature of the intervention. The  
39 baseline features of the groups established by randomisation will be compared using  
40 descriptive statistics; no statistical tests will be performed.  
41  
42  
43  
44  
45  
46  
47  
48

### 49 ***Primary endpoint*** 50

51 Day-90 mortality will be reported as the point estimate with the 95% confidence  
52 interval in each group. The difference in proportions with the 95% confidence interval will  
53 also be estimated. Day-90 mortality will be compared between the two groups using the chi-  
54 square test.  
55  
56  
57  
58  
59  
60

1  
2  
3 Time to readiness for ICU discharge will be analysed using the competing risk  
4  
5 approach (Fine and Gray model), with death in the ICU as a competing risk.  
6

7  
8 *Secondary endpoints*  
9

10 The incidence of patients with at least one nosocomial infection will be estimated and  
11 compared between the groups using a Fine and Gray model, with death and ICU discharge  
12 alive as competing events. The incidence of patients with at least one VAP episode will be  
13 estimated using a Fine and Gray model, with not only death as a competing risk, but also  
14 time to extubation +2 days, since after this point any episode of pneumonia would not be  
15 classified as VAP. For CVC-related infections, the competing risks will be death and CVC  
16 removal; for urinary tract infections they will be death and urinary catheter removal.  
17 Bacteraemia, soft tissue infections, and other infections will be analysed using the same  
18 method as for the pooled nosocomial infections. For descriptive bacteriological data  
19 (organisms recovered with their resistance profiles for each nosocomial infection), only  
20 descriptive analyses will be performed. For the proportions of patients with at least one  
21 episode of vomiting or regurgitation, diarrhoea, constipation, documented acute colonic  
22 pseudo-obstruction, documented bowel ischaemia, mechanical complication of CVC  
23 insertion, hypoglycaemia from day 0 to day 7, and liver dysfunction, the method will be the  
24 same as for nosocomial infections. Changes over time in delivered calories and proteins will  
25 be represented graphically by boxplots created each day on the same graph; changes over  
26 time will be compared between the two groups using a mixed linear model, after data  
27 transformation if necessary. The same analysis will be performed for volume of feeds  
28 delivered each day. The proportion of patients who achieved 100% of their daily calorie  
29 target will be determined at each follow-up time point (in days) and compared between the  
30 two groups using a logistic random-effects model. Day-28 mortality will be analysed in the  
31 same way as day-90 mortality. For ICU and hospital mortality rates, a Fine and Gray model  
32  
33  
34  
35  
36  
37  
38  
39  
40  
41  
42  
43  
44  
45  
46  
47  
48  
49  
50  
51  
52  
53  
54  
55  
56  
57  
58  
59  
60

1  
2  
3 will be used, with ICU discharge and hospital discharge as events competing with death  
4  
5 during the stay. Time to extubation will be analysed using a Fine and Gray model with death  
6  
7 and ICU discharge as competing events. Changes over time in SOFA, total insulin, blood  
8  
9 glucose, nutritional markers and body weight will be analysed using the method described  
10  
11 above for the number of calories delivered. For the proportion of mobilised patients, patients  
12  
13 with at least one criterion of persistent altered health status at the time of readiness for ICU  
14  
15 discharge, and patients with ICU-acquired paresis, the method will be the same as for  
16  
17 nosocomial infections. The Medical Research Council (MRC) sum score at the time of  
18  
19 readiness for ICU discharge and days on insulin will be compared between the two groups  
20  
21 using the non-parametric Wilcoxon test. The total quality-of-life SF-36 score will be  
22  
23 compared between the two groups using a mixed linear model.  
24  
25  
26  
27  
28  
29  
30

### 31 ***Data collection and follow-up***

32  
33 The following data will be recorded until the patient is extubated: demographic and  
34  
35 clinical data, nutrition monitoring data, treatments given, laboratory tests, invasive devices,  
36  
37 functional evaluation, and data relevant to nosocomial infections. The patient will be  
38  
39 followed up for 1 year after study inclusion; at hospital discharge, on D28 and D90, and at 1  
40  
41 year, the vital status will be recorded. The SF-36 score will be recorded on D90 and 1 year  
42  
43 after study inclusion. Table 3 is the study flow-chart.  
44  
45  
46  
47  
48  
49

### 50 ***Data entry and monitoring***

51  
52 An Internet-based data collection tool will be used for this study to store the data of  
53  
54 all the participants. This electronic case-report form (eCRF) is a secure, interactive, web-  
55  
56 response system available at each study centre. It is provided and managed by the biometrical  
57  
58  
59  
60

unit of the Tours University Hospital (CIC INSERM 1415, Tours, France). Access to the eCRF will require only an Internet connection and a browser.

Monitoring of the data collected and of the screening forms in each participating centre will be carried out by the Research Division, Promotion Department, of the Nantes University hospital. Research assistants will regularly perform on-site checks of adherence to the protocol and accuracy of recorded data.

### ***Trial Status***

Inclusions started in July 2018. The scheduled interim analysis were performed on the first 1000 (by October 2009) and 2000 (by March 2020) included patients, respectively. Both analyses led the DSMB to recommend continuation of the study. Recruitment in the trial was interrupted from March to June 2020 because of the COVID-19 crisis, when all ICUs were full with COVID-19 patients and all research teams were working only on COVID-19 trials. By August 19, 2020, 2764 patients had been included. Recruitment is expected to be complete by December 2020.

### **Ethics and dissemination**

#### ***Ethical review board***

The NUTRIREA-3 trial was approved by the competent French authorities on 20 April 2016 (*Comité de Protection des Personnes Sud-Méditerranée 2*, registration 2018-A00424-51) and registered on ClinicalTrials (NCT03573739) in June 2018.

#### ***Consent***

The patients are included after providing their signed informed consent to trial participation. For patients unable to consent because of impaired consciousness or severe critical illness, information about the study is provided to their next of kin. Patients who are

1  
2  
3 unable to consent and for whom no relative is available to consent to study participation  
4  
5 within a timeframe compatible with the study design are included after completion of an  
6  
7 emergency consent form by the bedside physician. The relatives are informed of the  
8  
9 inclusion as soon as possible. Patients are asked to confirm their willingness to participate in  
10  
11 the trial once they regain decision-making capacity. Data of patients without relatives who  
12  
13 die without previously recovering consciousness will be included in the statistical analysis.  
14  
15

### 16 17 ***Confidentiality and source data archiving***

18  
19 The medical data about each patient will be communicated only to the institution (i.e.,  
20  
21 the sponsor) with which the chief investigator is affiliated or to a person appointed by the  
22  
23 chief investigator and the sponsor under conditions that ensure the confidentiality of the  
24  
25 patient data. During or at completion of the study, the data collected from the study  
26  
27 participants and communicated by the individuals involved in the study will be rendered  
28  
29 anonymous. Study investigators will archive all study data for at least 15 years after the end  
30  
31 of the study.  
32  
33

### 34 35 ***Dissemination policy***

36  
37 The publication policy will comply with international recommendations (N Engl J  
38  
39 Med, 1997; 336:309-315) and the CONSORT statement (<http://www.consort-statement.org>).  
40  
41 Findings will be published in peer-reviewed journals and presented during national and  
42  
43 international scientific meetings. Communications and scientific reports relevant to this study  
44  
45 will be under the responsibility of the study coordinator (JR), who will obtain the approval of  
46  
47 the other investigators.  
48  
49

### 50 51 ***Patient and public involvement***

52  
53 Neither patients nor the public are involved in the study.  
54  
55  
56  
57  
58  
59  
60

## References

1. Puthuchery ZA, Rawal J, McPhail M, et al. Acute skeletal muscle wasting in critical illness. *JAMA* 2013;310(15):1591-1600.
2. Hermans G, Van den Berghe G. Clinical review: intensive care unit acquired weakness. *Crit Care* 2015;19:274.
3. Singer P, Blaser AR, Berger MM, et al. ESPEN guideline on clinical nutrition in the intensive care unit. *Clin Nutr* 2018.
4. Taylor BE, McClave SA, Martindale RG, et al. Guidelines for the Provision and Assessment of Nutrition Support Therapy in the Adult Critically Ill Patient: Society of Critical Care Medicine (SCCM) and American Society for Parenteral and Enteral Nutrition (A.S.P.E.N.). *Crit Care Med* 2016;44(2):390-438.
5. Blaser AR, Starkopf J, Kirsimagi U, et al. Definition, prevalence, and outcome of feeding intolerance in intensive care: a systematic review and meta-analysis. *Acta Anaesthesiol Scand* 2014;58(8):914-922.
6. Alberda C, Gramlich L, Jones N, et al. The relationship between nutritional intake and clinical outcomes in critically ill patients: results of an international multicenter observational study. *Intensive care medicine* 2009;35(10):1728-1737.
7. Elke G, Wang M, Weiler N, et al. Close to recommended caloric and protein intake by enteral nutrition is associated with better clinical outcome of critically ill septic patients: secondary analysis of a large international nutrition database. *Crit Care* 2014;18(1):R29.
8. Compher C, Chittams J, Sammarco T, et al. Greater Protein and Energy Intake May Be Associated With Improved Mortality in Higher Risk Critically Ill Patients: A Multicenter, Multinational Observational Study. *Crit Care Med* 2017;45(2):156-163.



- 1  
2  
3 9. Allingstrup MJ, Esmailzadeh N, Wilkens Knudsen A, et al. Provision of protein and  
4 energy in relation to measured requirements in intensive care patients. *Clin Nutr*  
5  
6 2012;31(4):462-468.  
7
- 8  
9  
10 10. Faisy C, Candela Llerena M, Savalle M, et al. Early ICU energy deficit is a risk factor  
11 for *Staphylococcus aureus* ventilator-associated pneumonia. *Chest* 2011;140(5):1254-1260.  
12
- 13  
14 11. Villet S, Chiolerio RL, Bollmann MD, et al. Negative impact of hypocaloric feeding  
15 and energy balance on clinical outcome in ICU patients. *Clin Nutr* 2005;24(4):502-509.  
16
- 17  
18 12. Wei X, Day AG, Ouellette-Kuntz H, et al. The Association Between Nutritional  
19 Adequacy and Long-Term Outcomes in Critically Ill Patients Requiring Prolonged  
20 Mechanical Ventilation: A Multicenter Cohort Study. *Crit Care Med* 2015;43(8):1569-1579.  
21
- 22  
23 13. Casaer MP, Van den Berghe G. Nutrition in the acute phase of critical illness. *N Engl*  
24 *J Med* 2014;370(25):2450-2451.  
25
- 26  
27 14. Preiser JC, van Zanten AR, Berger MM, et al. Metabolic and nutritional support of  
28 critically ill patients: consensus and controversies. *Crit Care* 2015;19(1):35.  
29
- 30  
31 15. Doig GS, Simpson F, Finfer S, et al. Effect of evidence-based feeding guidelines on  
32 mortality of critically ill adults: a cluster randomized controlled trial. *JAMA*  
33 2008;300(23):2731-2741.  
34
- 35  
36 16. Heyland DK, Murch L, Cahill N, et al. Enhanced Protein-Energy Provision via the  
37 Enteral Route Feeding Protocol in Critically Ill Patients: Results of a Cluster Randomized  
38 Trial. *Crit Care Med* 2013.  
39
- 40  
41 17. Favez T, Kerklaan D, Mesotten D, et al. Early versus Late Parenteral Nutrition in  
42 Critically Ill Children. *N Engl J Med* 2016;374(12):1111-1122.  
43
- 44  
45 18. Casaer MP, Mesotten D, Hermans G, et al. Early versus late parenteral nutrition in  
46 critically ill adults. *N Engl J Med* 2011;365(6):506-517.  
47  
48  
49  
50  
51  
52  
53  
54  
55  
56  
57  
58  
59  
60

19. Casaer MP, Wilmer A, Hermans G, et al. Role of disease and macronutrient dose in the randomized controlled EPaNIC trial: a post hoc analysis. *Am J Respir Crit Care Med* 2013;187(3):247-255.
20. Vanhorebeek I, Gunst J, Derde S, et al. Insufficient activation of autophagy allows cellular damage to accumulate in critically ill patients. *J Clin Endocrinol Metab* 2011;96(4):E633-645.
21. Choi AM, Ryter SW, Levine B. Autophagy in human health and disease. *N Engl J Med* 2013;368(7):651-662.
22. Arabi YM, Aldawood AS, Haddad SH, et al. Permissive Underfeeding or Standard Enteral Feeding in Critically Ill Adults. *N Engl J Med* 2015;372(25):2398-2408.
23. Needham DM, Dinglas VD, Bienvenu OJ, et al. One year outcomes in patients with acute lung injury randomised to initial trophic or full enteral feeding: prospective follow-up of EDEN randomised trial. *BMJ* 2013;346:f1532.
24. Rice TW, Wheeler AP, Thompson BT, et al. Initial trophic vs full enteral feeding in patients with acute lung injury: the EDEN randomized trial. *JAMA* 2012;307(8):795-803.
25. Deane AM, Little L, Bellomo R, et al. Outcomes Six Months after Delivering 100% or 70% of Enteral Calorie Requirements during Critical Illness (TARGET). A Randomized Controlled Trial. *Am J Respir Crit Care Med* 2020;201(7):814-822.
26. Marik PE, Hooper MH. Normocaloric versus hypocaloric feeding on the outcomes of ICU patients: a systematic review and meta-analysis. *Intensive Care Med* 2016;42(3):316-323.
27. Marik PE, Rice TW. Feeding the Critically Ill: More Questions Than Answers! *Am J Respir Crit Care Med* 2017;195(5):555-556.
28. Preiser JC. High protein intake during the early phase of critical illness: yes or no? *Crit Care* 2018;22(1):261.

- 1  
2  
3 29. Singer P, Cohen J. Nutrition in the ICU: proof of the pudding is in the tasting.  
4  
5 Intensive Care Med 2015;41(1):154-156.  
6
- 7  
8 30. Iwashyna TJ, Ely EW, Smith DM, et al. Long-term cognitive impairment and  
9  
10 functional disability among survivors of severe sepsis. JAMA 2010;304(16):1787-1794.  
11
- 12  
13 31. Rhodes A, Evans LE, Alhazzani W, et al. Surviving Sepsis Campaign: International  
14  
15 Guidelines for Management of Sepsis and Septic Shock: 2016. Intensive Care Med  
16  
17 2017;43(3):304-377.  
18
- 19  
20 32. Artinian V, Krayem H, DiGiovine B. Effects of early enteral feeding on the outcome  
21  
22 of critically ill mechanically ventilated medical patients. Chest 2006;129(4):960-967.  
23
- 24  
25 33. Harvey SE, Parrott F, Harrison DA, et al. Trial of the route of early nutritional  
26  
27 support in critically ill adults. N Engl J Med 2014;371(18):1673-1684.  
28
- 29  
30 34. Reignier J, Boisrame-Helms J, Brisard L, et al. Enteral versus parenteral early  
31  
32 nutrition in ventilated adults with shock: a randomised, controlled, multicentre, open-label,  
33  
34 parallel-group study (NUTRIREA-2). Lancet 2018;391(10116):133-143.  
35
- 36  
37 35. Reignier J, Mercier E, Le Gouge A, et al. Effect of not monitoring residual gastric  
38  
39 volume on risk of ventilator-associated pneumonia in adults receiving mechanical ventilation  
40  
41 and early enteral feeding: a randomized controlled trial. JAMA 2013;309(3):249-256.  
42
- 43  
44 36. Poulard F, Dimet J, Martin-Lefevre L, et al. Impact of Not Measuring Residual  
45  
46 Gastric Volume in Mechanically Ventilated Patients Receiving Early Enteral Feeding: A  
47  
48 Prospective Before-After Study. JPEN J Parenter Enteral Nutr 2009.  
49
- 50  
51 37. Reignier J, Dimet J, Martin-Lefevre L, et al. Before-after study of a standardized ICU  
52  
53 protocol for early enteral feeding in patients turned in the prone position. Clin Nutr  
54  
55 2010;29(2):210-216.  
56  
57  
58  
59  
60

- 1  
2  
3 38. Gacouin A, Camus C, Gros A, et al. Constipation in long-term ventilated patients:  
4 associated factors and impact on intensive care unit outcomes. *Critical care medicine*  
5  
6 2010;38(10):1933-1938.  
7  
8  
9  
10 39. van der Spoel JI, Schultz MJ, van der Voort PH, et al. Influence of severity of illness,  
11 medication and selective decontamination on defecation. *Intensive Care Med*  
12  
13 2006;32(6):875-880.  
14  
15  
16  
17 40. Brisard L, Le Gouge A, Lascarrou J, et al. Impact of early enteral versus parenteral  
18 nutrition on mortality in patients requiring mechanical ventilation and catecholamines: study  
19 protocol for a randomized controlled trial (NUTRIREA-2). *Trials* 2014;15(1):507.  
20  
21  
22  
23  
24 41. Chastre J, Fagon JY. Ventilator-associated pneumonia. *Am J Respir Crit Care Med*  
25 2002;165(7):867-903.  
26  
27  
28  
29 42. Hubmayr RD, Burchardi H, Elliot M, et al. Statement of the 4th International  
30 Consensus Conference in Critical Care on ICU-Acquired Pneumonia--Chicago, Illinois, May  
31 2002. *Intensive Care Med* 2002;28(11):1521-1536.  
32  
33  
34  
35 43. Favier C, Bonneau HP, Tran Minh V, et al. Endoscopic diagnosis of regressive  
36 ischemic colitis. Endoscopic, histologic and arteriographic correlations. *Nouv Presse Med*  
37 1976;5(2):77-79.  
38  
39  
40  
41  
42 44. Wright SE, Thomas K, Watson G, et al. Intensive versus standard physical  
43 rehabilitation therapy in the critically ill (EPICC): a multicentre, parallel-group, randomised  
44 controlled trial. *Thorax* 2017.  
45  
46  
47  
48  
49 45. Bittner EA, Martyn JA, George E, et al. Measurement of muscle strength in the  
50 intensive care unit. *Crit Care Med* 2009;37(10 Suppl):S321-330.  
51  
52  
53  
54 46. Sharshar T, Bastuji-Garin S, Stevens RD, et al. Presence and severity of intensive  
55 care unit-acquired paresis at time of awakening are associated with increased intensive care  
56 unit and hospital mortality. *Crit Care Med* 2009;37(12):3047-3053.  
57  
58  
59  
60

- 1  
2  
3 47. Santamaria JD, Duke GJ, Pilcher DV, et al. The timing of discharge from the  
4  
5 intensive care unit and subsequent mortality. A prospective, multicenter study. *Am J Respir*  
6  
7 *Crit Care Med* 2015;191(9):1033-1039.  
8  
9  
10 48. Ware J, Jr., Kosinski M, Gandek B. SF-36® Health Survey Manual & Interpretation  
11  
12 Guide. : Lincoln, RI: Quality Metric Incorporated; 2005.  
13  
14  
15 49. Oeyen SG, Vandijck DM, Benoit DD, et al. Quality of life after intensive care: a  
16  
17 systematic review of the literature. *Crit Care Med* 2010;38(12):2386-2400.  
18  
19  
20 50. Anthon CT, Granholm A, Perner A, et al. No firm evidence that lack of blinding  
21  
22 affects estimates of mortality in randomized clinical trials of intensive care interventions: a  
23  
24 systematic review and meta-analysis. *Journal of clinical epidemiology* 2018;100:71-81.  
25  
26  
27 51. Li G, Taljaard M, Van den Heuvel ER, et al. An introduction to multiplicity issues in  
28  
29 clinical trials: the what, why, when and how. *Int J Epidemiol* 2017;46(2):746-755.  
30  
31  
32  
33  
34  
35  
36  
37  
38  
39  
40  
41  
42  
43  
44  
45  
46  
47  
48  
49  
50  
51  
52  
53  
54  
55  
56  
57  
58  
59  
60

**AUTHORS' CONTRIBUTIONS:**

ALG and JR prepared the first draft of the manuscript.

JR, JBL, DM, ALG, and BGi wrote the manuscript.

JR, JBL, ALG, DM, and BGi participated in designing the NUTRIREA-3 study.

ALG and BGi wrote the statistical analysis plan and performed the sample size estimation.

JR and DM obtaining funding for the study.

JR, JBL, DA, LA, YH, PA, JB, MAN, NVB, LB, HNB, DC, LC, AC, CC, MD, VD, MD, AD, JD, SV, NAB, LMD, JO, OG, SG, BGu, SJ, FL, CL, PL, BM, JM, OM, FM, EM, JPM, SN, WP, GPi, GPI, JPQ, AR, LG, JR, JPR, FS, DS, MS, BS, FR, FT, NT, DT, GT, NTR, JFT, FT, PT, TV, IV, and CV contributed to acquire the study data.

All authors revised the manuscript for important intellectual content and read and approved the final version of the manuscript.

**FUNDING STATEMENT**

The NUTRIREA-3 trial is sponsored by the Nantes University Hospital (CHU, Nantes, France) and supported by a grant from the French Ministry of Health (*Programme Hospitalier de Recherche Clinique*, PHRC 2017-0213) that will cover all expenses related to the research. The NUTRIREA-3 trial does not require funding from, or any other form of participation of, any pharmaceutical company.

**COMPETING INTEREST STATEMENT**

JR had travel and accommodation expenses to attend scientific meetings covered by Baxter and Fresenius.

**ACKNOWLEDGEMENTS**

1  
2  
3 We are indebted to Antoinette Wolfe, MD, for assistance in preparing and reviewing  
4 the manuscript; Carine Coffre and Frédérique Musset for managing the database; Manon  
5 Rouaud for coordinating the study; and Prof. Sylvie Chevret (Biostatistics and Medical  
6 Information Department, Hôpital Saint-Louis, Paris, France; Centre de Recherche en  
7 Épidémiologie et Statistiques [CRESS-INSERM-UMR1153], Paris, France; Epidemiology  
8 and Clinical Statistics for Tumour, Respiratory, and Resuscitation Assessments [ECSTRRA]  
9 Team, Paris, France; Université de Paris, Paris, France), Prof. Jean Chastre (Medical ICU, La  
10 Pitié-Salpêtrière Hospital, Paris, France), and Prof. Pierre-François Laterre (St Luc  
11 University Hospital, Université Catholique de Louvain, Brussels, Belgium) for constituting  
12 the independent data safety and monitoring board.  
13  
14  
15  
16  
17  
18  
19  
20  
21  
22  
23  
24  
25  
26  
27  
28  
29  
30  
31  
32  
33  
34  
35  
36  
37  
38  
39  
40  
41  
42  
43  
44  
45  
46  
47  
48  
49  
50  
51  
52  
53  
54  
55  
56  
57  
58  
59  
60

**FIGURE LEGENDS****Figure 1:** Study interventions**Figure 2:** Study diagram

For peer review only



**Table 1: Criteria for readiness for ICU discharge**

---

*A patient will be considered ready for ICU discharge when he/she meets all of the following criteria:*

- No longer in need of, or at risk for needing, invasive mechanical ventilation
  - No longer in need of, or at risk for needing, vasoactive support
  - No agitation or altered consciousness requiring close monitoring and management
  - No severe acute metabolic or haematologic disorder requiring close monitoring and management
-

**Table 2: Mobilisation scale**

|                             |                                                                                                                                                                                                |
|-----------------------------|------------------------------------------------------------------------------------------------------------------------------------------------------------------------------------------------|
| <b>Remains in bed</b>       | <ul style="list-style-type: none"><li>▪ no mobilisation,</li><li>▪ turned in bed,</li><li>▪ sitting position in bed with the head of the bed elevated</li></ul>                                |
| <b>Mobilised in the bed</b> | <ul style="list-style-type: none"><li>▪ passive mobilisation of the legs in bed</li><li>▪ active mobilisation of the legs in bed</li><li>▪ cycling motions in bed</li></ul>                    |
| <b>Mobilised out of bed</b> | <ul style="list-style-type: none"><li>▪ sits on the edge of the bed with the feet on the floor</li><li>▪ sits in a chair</li><li>▪ stands</li><li>▪ marches in place</li><li>▪ walks</li></ul> |

**Table 3: Study flow chart of patient follow-up**

|                                                            | <b>Inclusion</b> | <b>D0*</b> | <b>D1 to Dn</b> | <b>End of study protocol</b> | <b>Ready for ICU discharge</b> | <b>D28</b> | <b>D90</b> | <b>One year End of follow-up **</b> |
|------------------------------------------------------------|------------------|------------|-----------------|------------------------------|--------------------------------|------------|------------|-------------------------------------|
| <b>Eligibility: check inclusion and exclusion criteria</b> | X                |            |                 |                              |                                |            |            |                                     |
| <b>Patient information and consent</b>                     | X                |            |                 |                              |                                |            |            |                                     |
| <b>Randomisation</b>                                       |                  | X          |                 |                              |                                |            |            |                                     |
| <b>Demographic characteristics</b>                         |                  | X          |                 |                              |                                |            |            |                                     |
| <b>Vital signs</b>                                         |                  | X          |                 |                              |                                |            |            |                                     |
| <b>Weight</b>                                              |                  | X          | X               |                              |                                |            |            |                                     |
| <b>Ventilation</b>                                         |                  | X          | X               |                              |                                |            |            |                                     |
| <b>Laboratory tests</b>                                    |                  | X          | X*              |                              |                                |            |            |                                     |
| <b>SOFA</b>                                                |                  | X          | X               |                              |                                |            |            |                                     |
| <b>Nutritional evaluation</b>                              |                  | X          | X               |                              |                                |            |            |                                     |
| <b>Treatments used</b>                                     |                  | X          | X               |                              |                                |            |            |                                     |
| <b>Daily nutritional intake</b>                            |                  | X          | X               |                              |                                |            |            |                                     |
| <b>Fluid intake</b>                                        |                  | X          | X               |                              |                                |            |            |                                     |
| <b>Nosocomial infections</b>                               |                  |            | X               |                              |                                |            |            |                                     |
| <b>Final extubation</b>                                    |                  |            |                 | X                            |                                |            |            |                                     |
| <b>Final discontinuation of nutritional support</b>        |                  |            |                 | X                            |                                |            |            |                                     |
| <b>Health status</b>                                       |                  |            |                 |                              | X                              |            |            |                                     |
| <b>MRC score</b>                                           |                  |            |                 |                              | X                              |            |            |                                     |
| <b>Survived / died</b>                                     |                  |            |                 |                              | X                              | X          | X          | X                                   |
| <b>SF-36</b>                                               |                  |            |                 |                              |                                |            | X          | X                                   |

\* from time of inclusion to 11:59 pm

\*\* Information will be collected by phone contact with patients or relatives.

**Figure 1: Study interventions**

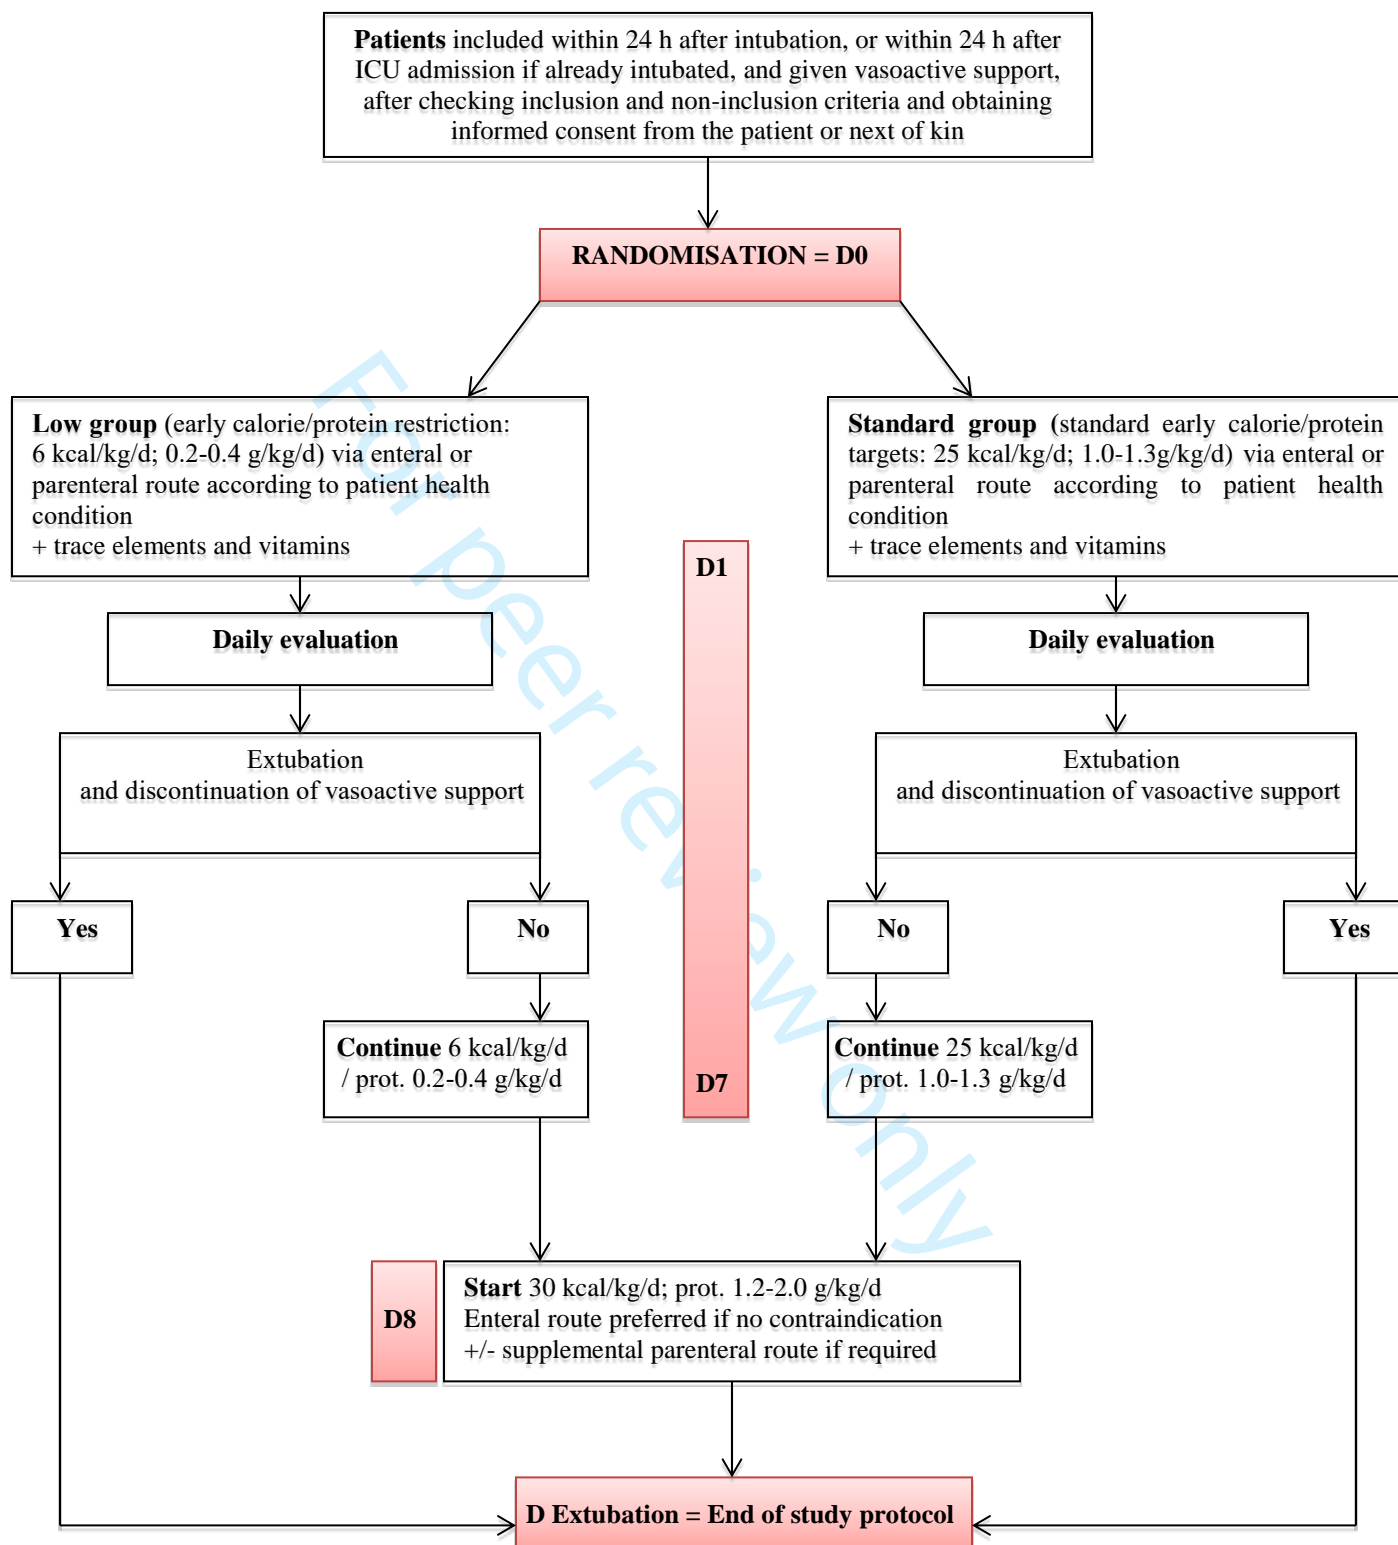

**Figure 2: Study diagram**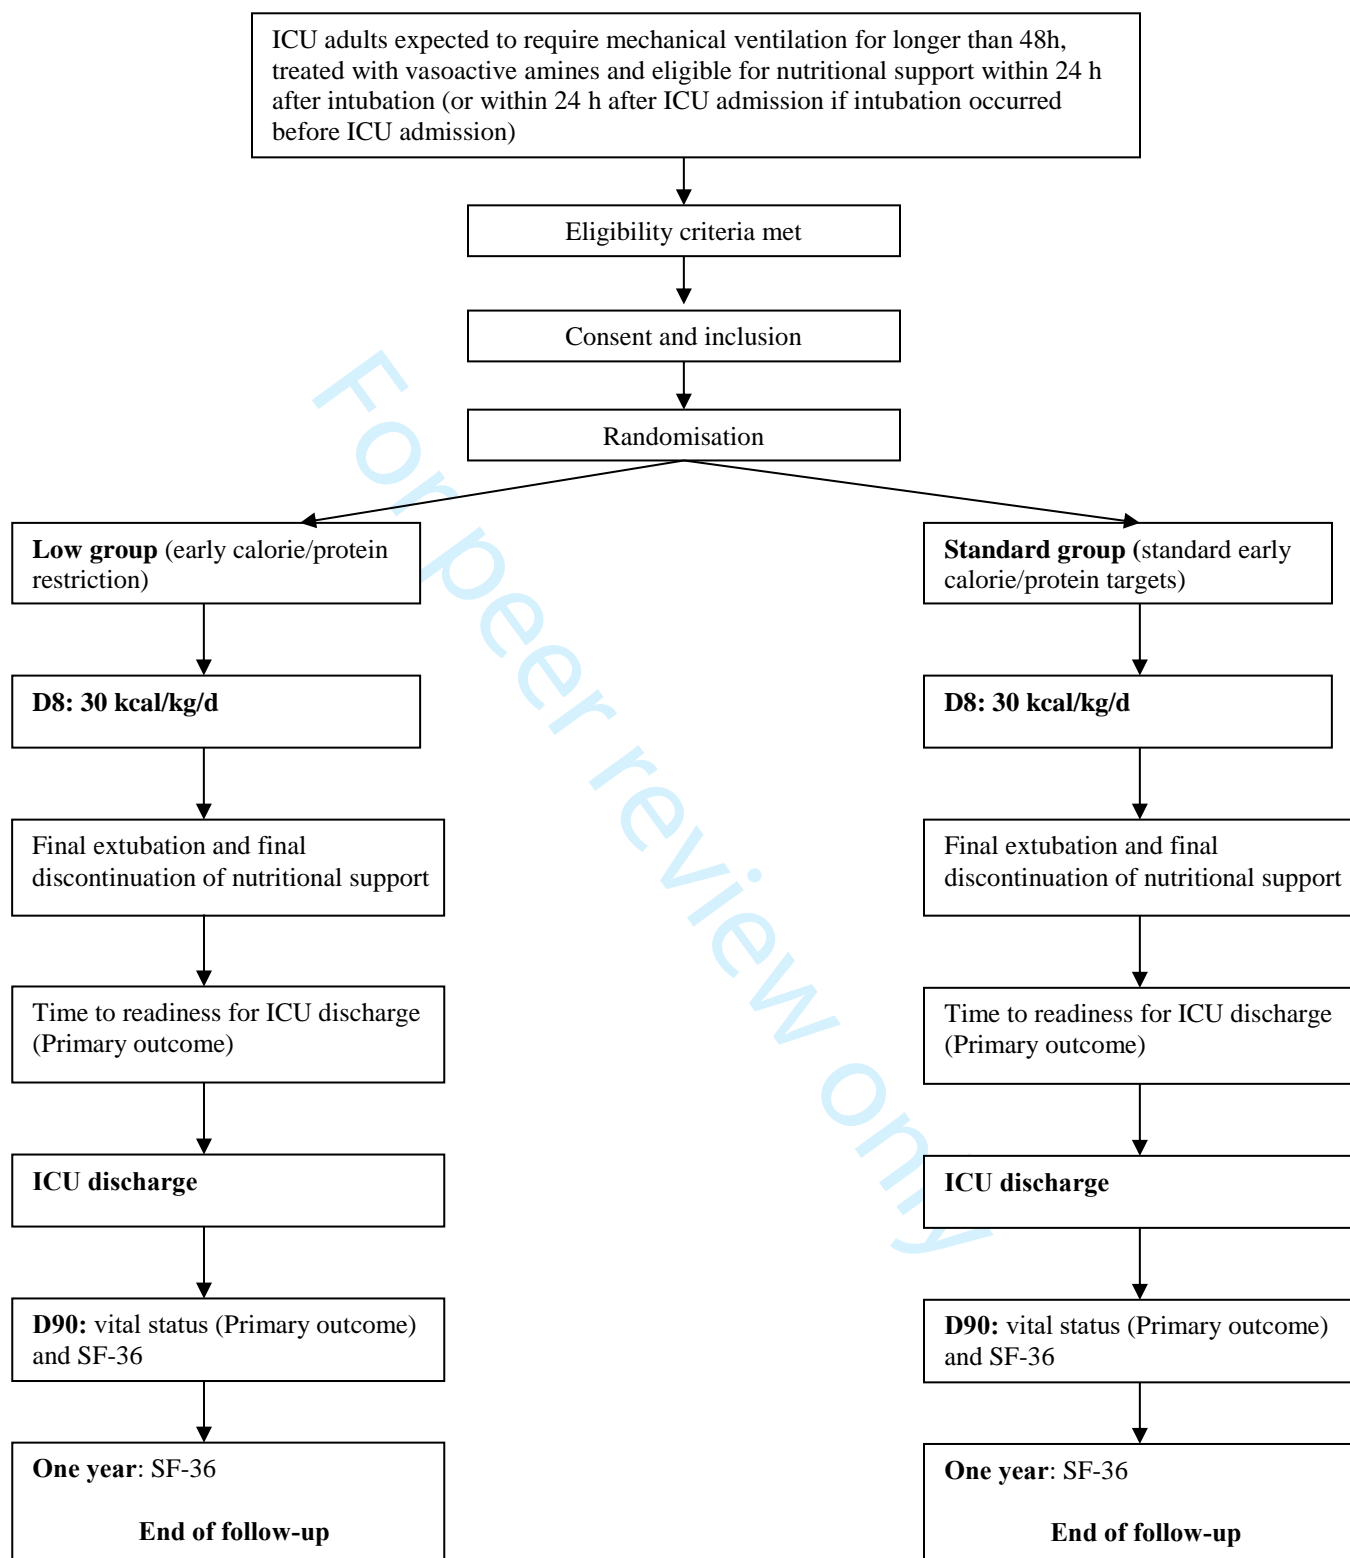

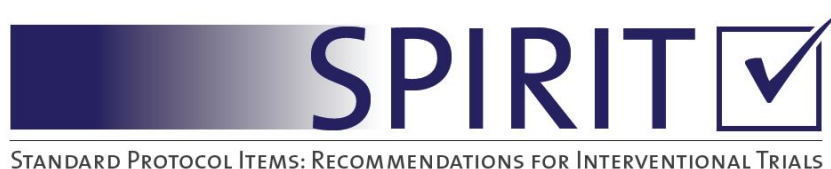

STANDARD PROTOCOL ITEMS: RECOMMENDATIONS FOR INTERVENTIONAL TRIALS

SPIRIT 2013 Checklist: Recommended items to address in a clinical trial protocol and related documents\*

| Section/item                      | Item No | Page | Description                                                                                                                                                                                                                                                                              |
|-----------------------------------|---------|------|------------------------------------------------------------------------------------------------------------------------------------------------------------------------------------------------------------------------------------------------------------------------------------------|
| <b>Administrative information</b> |         |      |                                                                                                                                                                                                                                                                                          |
| Title                             | 1       | 1    | Descriptive title identifying the study design, population, interventions, and, if applicable, trial acronym                                                                                                                                                                             |
| Trial registration                | 2a      | 9    | Trial identifier and registry name. If not yet registered, name of intended registry                                                                                                                                                                                                     |
|                                   | 2b      |      | All items from the World Health Organization Trial Registration Data Set                                                                                                                                                                                                                 |
| Protocol version                  | 3       | NA   | Date and version identifier                                                                                                                                                                                                                                                              |
| Funding                           | 4       | 29   | Sources and types of financial, material, and other support                                                                                                                                                                                                                              |
| Roles and responsibilities        | 5a      | 29   | Names, affiliations, and roles of protocol contributors                                                                                                                                                                                                                                  |
|                                   | 5b      | NA   | Name and contact information for the trial sponsor                                                                                                                                                                                                                                       |
|                                   | 5c      | 29   | Role of study sponsor and funders, if any, in study design; collection, management, analysis, and interpretation of data; writing of the report; and the decision to submit the report for publication, including whether they will have ultimate authority over any of these activities |
|                                   | 5d      | NA   | Composition, roles, and responsibilities of the coordinating centre, steering committee, endpoint adjudication committee, data management team, and other individuals or groups overseeing the trial, if applicable (see Item 21a for data monitoring committee)                         |
| <b>Introduction</b>               |         |      |                                                                                                                                                                                                                                                                                          |
| Background and rationale          | 6a      | 11   | Description of research question and justification for undertaking the trial, including summary of relevant studies (published and unpublished) examining benefits and harms for each intervention                                                                                       |
|                                   | 6b      | 12   | Explanation for choice of comparators                                                                                                                                                                                                                                                    |
| Objectives                        | 7       | 12   | Specific objectives or hypotheses                                                                                                                                                                                                                                                        |
| Trial design                      | 8       | 13   | Description of trial design including type of trial (eg, parallel group, crossover, factorial, single group), allocation ratio, and framework (eg, superiority, equivalence, noninferiority, exploratory)                                                                                |

### Methods: Participants, interventions, and outcomes

|                      |     |        |                                                                                                                                                                                                                                                                                                                                                                                |
|----------------------|-----|--------|--------------------------------------------------------------------------------------------------------------------------------------------------------------------------------------------------------------------------------------------------------------------------------------------------------------------------------------------------------------------------------|
| Study setting        | 9   | 13     | Description of study settings (eg, community clinic, academic hospital) and list of countries where data will be collected. Reference to where list of study sites can be obtained                                                                                                                                                                                             |
| Eligibility criteria | 10  | 13     | Inclusion and exclusion criteria for participants. If applicable, eligibility criteria for study centres and individuals who will perform the interventions (eg, surgeons, psychotherapists)                                                                                                                                                                                   |
| Interventions        | 11a | 14     | Interventions for each group with sufficient detail to allow replication, including how and when they will be administered                                                                                                                                                                                                                                                     |
|                      | 11b | 14-17  | Criteria for discontinuing or modifying allocated interventions for a given trial participant (eg, drug dose change in response to harms, participant request, or improving/worsening disease)                                                                                                                                                                                 |
|                      | 11c | 14-17  | Strategies to improve adherence to intervention protocols, and any procedures for monitoring adherence (eg, drug tablet return, laboratory tests)                                                                                                                                                                                                                              |
|                      | 11d | 14-17  | Relevant concomitant care and interventions that are permitted or prohibited during the trial                                                                                                                                                                                                                                                                                  |
| Outcomes             | 12  | 18     | Primary, secondary, and other outcomes, including the specific measurement variable (eg, systolic blood pressure), analysis metric (eg, change from baseline, final value, time to event), method of aggregation (eg, median, proportion), and time point for each outcome. Explanation of the clinical relevance of chosen efficacy and harm outcomes is strongly recommended |
| Participant timeline | 13  | 21, 25 | Time schedule of enrolment, interventions (including any run-ins and washouts), assessments, and visits for participants. A schematic diagram is highly recommended (see Figure)                                                                                                                                                                                               |
| Sample size          | 14  | 22     | Estimated number of participants needed to achieve study objectives and how it was determined, including clinical and statistical assumptions supporting any sample size calculations                                                                                                                                                                                          |
| Recruitment          | 15  | 21     | Strategies for achieving adequate participant enrolment to reach target sample size                                                                                                                                                                                                                                                                                            |

### Methods: Assignment of interventions (for controlled trials)

#### Allocation:

|                     |     |    |                                                                                                                                                                                                                                                                                                                                                          |
|---------------------|-----|----|----------------------------------------------------------------------------------------------------------------------------------------------------------------------------------------------------------------------------------------------------------------------------------------------------------------------------------------------------------|
| Sequence generation | 16a | 22 | Method of generating the allocation sequence (eg, computer-generated random numbers), and list of any factors for stratification. To reduce predictability of a random sequence, details of any planned restriction (eg, blocking) should be provided in a separate document that is unavailable to those who enrol participants or assign interventions |
|---------------------|-----|----|----------------------------------------------------------------------------------------------------------------------------------------------------------------------------------------------------------------------------------------------------------------------------------------------------------------------------------------------------------|

|    |                |     |    |                                                                         |
|----|----------------|-----|----|-------------------------------------------------------------------------|
| 1  |                |     |    |                                                                         |
| 2  | Allocation     | 16b | 22 | Mechanism of implementing the allocation sequence (eg, central          |
| 3  | concealment    |     |    | telephone; sequentially numbered, opaque, sealed envelopes),            |
| 4  | mechanism      |     |    | describing any steps to conceal the sequence until interventions are    |
| 5  |                |     |    | assigned                                                                |
| 6  |                |     |    |                                                                         |
| 7  | Implementation | 16c | 22 | Who will generate the allocation sequence, who will enrol participants, |
| 8  |                |     |    | and who will assign participants to interventions                       |
| 9  |                |     |    |                                                                         |
| 10 | Blinding       | 17a | 22 | Who will be blinded after assignment to interventions (eg, trial        |
| 11 | (masking)      |     |    | participants, care providers, outcome assessors, data analysts), and    |
| 12 |                |     |    | how                                                                     |
| 13 |                |     |    |                                                                         |
| 14 |                |     |    |                                                                         |
| 15 |                | 17b | NA | If blinded, circumstances under which unblinding is permissible, and    |
| 16 |                |     |    | procedure for revealing a participant's allocated intervention during   |
| 17 |                |     |    | the trial                                                               |
| 18 |                |     |    |                                                                         |

### Methods: Data collection, management, and analysis

|    |                 |     |     |                                                                          |
|----|-----------------|-----|-----|--------------------------------------------------------------------------|
| 21 |                 |     |     |                                                                          |
| 22 | Data collection | 18a | 25  | Plans for assessment and collection of outcome, baseline, and other      |
| 23 | methods         |     |     | trial data, including any related processes to promote data quality (eg, |
| 24 |                 |     |     | duplicate measurements, training of assessors) and a description of      |
| 25 |                 |     |     | study instruments (eg, questionnaires, laboratory tests) along with      |
| 26 |                 |     |     | their reliability and validity, if known. Reference to where data        |
| 27 |                 |     |     | collection forms can be found, if not in the protocol                    |
| 28 |                 |     |     |                                                                          |
| 29 |                 |     |     |                                                                          |
| 30 |                 | 18b | 25  | Plans to promote participant retention and complete follow-up,           |
| 31 |                 |     |     | including list of any outcome data to be collected for participants who  |
| 32 |                 |     |     | discontinue or deviate from intervention protocols                       |
| 33 |                 |     |     |                                                                          |
| 34 | Data            | 19  | 26  | Plans for data entry, coding, security, and storage, including any       |
| 35 | management      |     |     | related processes to promote data quality (eg, double data entry;        |
| 36 |                 |     |     | range checks for data values). Reference to where details of data        |
| 37 |                 |     |     | management procedures can be found, if not in the protocol               |
| 38 |                 |     |     |                                                                          |
| 39 |                 |     |     |                                                                          |
| 40 | Statistical     | 20a | 24  | Statistical methods for analysing primary and secondary outcomes.        |
| 41 | methods         |     |     | Reference to where other details of the statistical analysis plan can be |
| 42 |                 |     |     | found, if not in the protocol                                            |
| 43 |                 |     |     |                                                                          |
| 44 |                 | 20b | 24  | Methods for any additional analyses (eg, subgroup and adjusted           |
| 45 |                 |     |     | analyses)                                                                |
| 46 |                 |     |     |                                                                          |
| 47 |                 |     |     |                                                                          |
| 48 |                 | 20c | 23- | Definition of analysis population relating to protocol non-adherence     |
| 49 |                 |     | 24  | (eg, as randomised analysis), and any statistical methods to handle      |
| 50 |                 |     |     | missing data (eg, multiple imputation)                                   |
| 51 |                 |     |     |                                                                          |

### Methods: Monitoring

|    |                 |     |    |                                                                      |
|----|-----------------|-----|----|----------------------------------------------------------------------|
| 52 |                 |     |    |                                                                      |
| 53 |                 |     |    |                                                                      |
| 54 | Data monitoring | 21a | NA | Composition of data monitoring committee (DMC); summary of its role  |
| 55 |                 |     |    | and reporting structure; statement of whether it is independent from |
| 56 |                 |     |    | the sponsor and competing interests; and reference to where further  |
| 57 |                 |     |    | details about its charter can be found, if not in the protocol.      |
| 58 |                 |     |    | Alternatively, an explanation of why a DMC is not needed             |
| 59 |                 |     |    |                                                                      |
| 60 |                 |     |    |                                                                      |



|          |     |    |                                                                                                                                                                                   |
|----------|-----|----|-----------------------------------------------------------------------------------------------------------------------------------------------------------------------------------|
|          | 21b | 23 | Description of any interim analyses and stopping guidelines, including who will have access to these interim results and make the final decision to terminate the trial           |
| Harms    | 22  | NA | Plans for collecting, assessing, reporting, and managing solicited and spontaneously reported adverse events and other unintended effects of trial interventions or trial conduct |
| Auditing | 23  | NA | Frequency and procedures for auditing trial conduct, if any, and whether the process will be independent from investigators and the sponsor                                       |

### Ethics and dissemination

|                               |     |    |                                                                                                                                                                                                                                                                                     |
|-------------------------------|-----|----|-------------------------------------------------------------------------------------------------------------------------------------------------------------------------------------------------------------------------------------------------------------------------------------|
| Research ethics approval      | 24  | 26 | Plans for seeking research ethics committee/institutional review board (REC/IRB) approval                                                                                                                                                                                           |
| Protocol amendments           | 25  |    | Plans for communicating important protocol modifications (eg, changes to eligibility criteria, outcomes, analyses) to relevant parties (eg, investigators, REC/IRBs, trial participants, trial registries, journals, regulators)                                                    |
| Consent or assent             | 26a | 27 | Who will obtain informed consent or assent from potential trial participants or authorised surrogates, and how (see Item 32)                                                                                                                                                        |
|                               | 26b | NA | Additional consent provisions for collection and use of participant data and biological specimens in ancillary studies, if applicable                                                                                                                                               |
| Confidentiality               | 27  | 27 | How personal information about potential and enrolled participants will be collected, shared, and maintained in order to protect confidentiality before, during, and after the trial                                                                                                |
| Declaration of interests      | 28  | 28 | Financial and other competing interests for principal investigators for the overall trial and each study site                                                                                                                                                                       |
| Access to data                | 29  | 27 | Statement of who will have access to the final trial dataset, and disclosure of contractual agreements that limit such access for investigators                                                                                                                                     |
| Ancillary and post-trial care | 30  | NA | Provisions, if any, for ancillary and post-trial care, and for compensation to those who suffer harm from trial participation                                                                                                                                                       |
| Dissemination policy          | 31a | 27 | Plans for investigators and sponsor to communicate trial results to participants, healthcare professionals, the public, and other relevant groups (eg, via publication, reporting in results databases, or other data sharing arrangements), including any publication restrictions |
|                               | 31b | 27 | Authorship eligibility guidelines and any intended use of professional writers                                                                                                                                                                                                      |
|                               | 31c | NA | Plans, if any, for granting public access to the full protocol, participant-level dataset, and statistical code                                                                                                                                                                     |

## Appendices

|                            |    |    |                                                                                                                                                                                                |
|----------------------------|----|----|------------------------------------------------------------------------------------------------------------------------------------------------------------------------------------------------|
| Informed consent materials | 32 |    | Model consent form and other related documentation given to participants and authorised surrogates                                                                                             |
| Biological specimens       | 33 | NA | Plans for collection, laboratory evaluation, and storage of biological specimens for genetic or molecular analysis in the current trial and for future use in ancillary studies, if applicable |

\*It is strongly recommended that this checklist be read in conjunction with the SPIRIT 2013 Explanation & Elaboration for important clarification on the items. Amendments to the protocol should be tracked and dated. The SPIRIT checklist is copyrighted by the SPIRIT Group under the Creative Commons "[Attribution-NonCommercial-NoDerivs 3.0 Unported](#)" license.

For peer review only
